# Supplementary material
Source: publisher figshare collection journal article supplement (https://acs.figshare.com/ndownloader/files/7895971)

# ***Supporting Information***

## **Total Synthesis and Structural Determination of the Dimeric Tetrahydroxanthone Ascherxanthone A**

Zheming Xiao, Yayue Li, Shuanhu Gao\*

Shanghai Key Laboratory of Green Chemistry and Chemical Processes, Department of Chemistry,  
East China Normal University, 3663N Zhongshan Road, Shanghai 200062, China.

Email: shgao@chem.ecnu.edu.cn

Fax: (+) 86-21-62604784

## **Supporting Information**

|                                                                                                        |     |
|--------------------------------------------------------------------------------------------------------|-----|
| <b>General Experimental Procedures:</b> .....                                                          | S2  |
| <b>Reference:</b> .....                                                                                | S21 |
| <b><sup>1</sup>H and <sup>13</sup>C NMR Spectra of the Synthetic Intermediates and Products:</b> ..... | S25 |

## General Experimental Procedures:

All reactions were carried out under nitrogen unless noted. Anhydrous 1,4-dioxane, dichloromethane, acetonitrile, N,N-dimethylformamide, 1,2-dichloroethane were distilled from calcium hydride. Tetrahydrofuran was distilled from sodium-benzophenone ketyl, anhydrous toluene and *tert*-butyl methyl ether (MTBE) was distilled from sodium. Flash column chromatography was performed as described by Still (Still, W. C.; Kahn, M.; Mitra, A. *J. Org. Chem.* **1978**, *43*, 2923–2925), employing Qingdao Haiyang silica gel 60 (200–300 mesh). TLC analyses were performed on EMD 250  $\mu$ m Silica Gel HSGF<sub>254</sub> plates and visualized by quenching of UV fluorescence ( $\lambda_{\text{max}}$ =254 nm), or by staining ceric ammonium molybdate, ammonium molybdate, phosphomolybdic acid, or potassium permanganate. <sup>1</sup>H and <sup>13</sup>C NMR spectra were recorded on a Bruker-500, 400, 300 spectrometer. Chemical shifts for <sup>1</sup>H and <sup>13</sup>C NMR spectra are reported in ppm ( $\delta$ ) relative to residue protium and carbon resonance in the solvent (CDCl<sub>3</sub>:  $\delta$  7.26, 77.0 ppm) and the multiplicities are presented as follows: s = singlet, d = doublet, t = triplet, q = quartet, m = multiplet, br = broad. High-resolution mass spectra (HRMS) were acquired on Waters Micromass GCT Premier, Thermo Fisher Scientific LTQ FT Ultra and Mass spectra at Agilent 5975C. HPLC analysis was performed on Dionex U 3000 and Shimadzu LC-20AD. Infrared (IR) spectra were obtained using a Thermo Electron Corporation Nicolet Nexus 670 FT-IR Spectrometer. The  $[\alpha]_D$  was recorded using PolAAr 3005 High Accuracy Polarimeter.

## Screening ligands of asymmetric dihydroxylation:

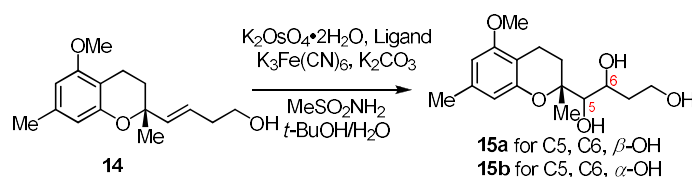

| entry | ligand         | temp | time | yield                  | dr <sup>a</sup> |
|-------|----------------|------|------|------------------------|-----------------|
| 1     | DHQ-PHAL       | 0 °C | 33 h | 80%                    | 4.6:1           |
| 2     | DHQ-PYR        | 0 °C | 33 h | 81%                    | 3.1:1           |
| 3     | DHQ-PYDQ       | 0 °C | 33 h | 81%                    | 4.7:1           |
| 4     | DHQ-AQN        | 0 °C | 33 h | 81%                    | 2.7:1           |
| 5     | DHQ-CLB        | 0 °C | 33 h | 78%                    | 3.0:1           |
| 6     | DHQ-PHN        | 0 °C | 33 h | 77%                    | 5.1:1           |
| 7     | DHQ-MEQ        | 0 °C | 33 h | 85%                    | 6.0:1           |
| 8     | - <sup>c</sup> | rt   | 5 d  | \                      | NR              |
| 9     | - <sup>d</sup> | rt   | 5 d  | 73% (81%) <sup>b</sup> | 1:5.5           |

a: all were determined by crude NMR analysis. b: based on starting material.  
 c: AD-mix- $\alpha$  was used. d: AD-mix- $\beta$  was used.

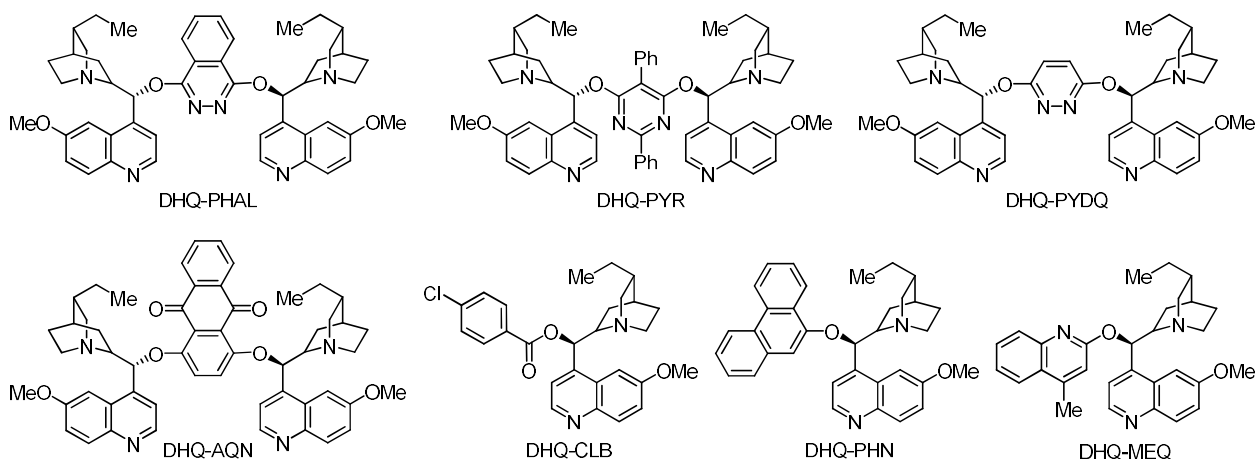

**General Procedure:** To a solution of *t*-BuOH/H<sub>2</sub>O (1 mL, 1:1) was added K<sub>2</sub>OsO<sub>4</sub>•2H<sub>2</sub>O (0.005 mmol, 0.05 equiv), ligand (0.02 mmol, 0.2 equiv), K<sub>3</sub>Fe(CN)<sub>6</sub> (0.3 mmol, 3 equiv), K<sub>2</sub>CO<sub>3</sub> (0.3 mmol, 3 equiv), MeSO<sub>2</sub>NH<sub>2</sub> (0.1 mmol, 1 equiv), then the solution was stirred at room temperature (about 21 °C) for 1 h. **14** (neat, 0.1 mmol, 1 equiv) was added, and the solution was stirred at 0 °C (entries 1-7) or room temperature (entries 8-9). It was quenched by saturated aqueous Na<sub>2</sub>SO<sub>3</sub> (5 mL). The mixture was extracted with EtOAc (5 mL×4). The combined organic phase was washed with brine (10 mL×2). The organic phase was dried over Na<sub>2</sub>SO<sub>4</sub>, filtered, concentrated, and purified by silica gel column chromatography (25% to 50% Ethyl acetate-petroleum ether) to give **15** as a white solid.

### Procedure for the preparation of substrates:

We prepared racemic **18**, from racemic **11**, using the same procedures as chiral **18**. Racemic **11** was synthesized following the procedure reported by Gong<sup>[1]</sup> using Pd(OAc)<sub>2</sub> as catalyst, PPh<sub>3</sub> as ligand.

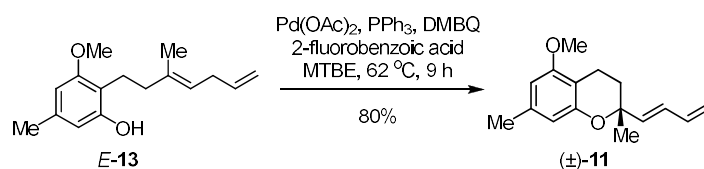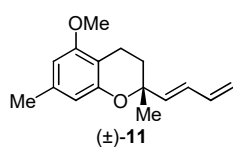

**Olefin (±)-11.** To a dried 500 mL Schlenk bottle was added Pd(OAc)<sub>2</sub> (0.4 g, 1.8 mmol, 0.038 equiv), PPh<sub>3</sub> (1.52 g, 5.8 mmol, 0.12 equiv), 2,6-dimethoxybenzo-1,4-quinone (DMBQ) (7.7 g, 58 mmol, 1.2 equiv) and 2-fluorobenzoic acid (0.5 g, 3.6 mmol, 0.076 equiv) successively, then it was pumped and replaced with N<sub>2</sub> atmosphere for three times, followed by (*E*)-**11** (11.5 g, 46.7 mmol, 1 equiv) and anhydrous *tert*-butyl methyl ether (MTBE) (234 mL) addition. The solution was subjected to three freeze-pump-thaw cycles using liquid nitrogen to degas the solution, and then it was heated to 62 °C and remained for 9 h. After the mixture cooled to rt, it was concentrated, and purified by silica gel column chromatography (10% to 20% CH<sub>2</sub>Cl<sub>2</sub>-petroleum ether) to give (±)-**11** as a colorless oil (9.13 g, 80%).

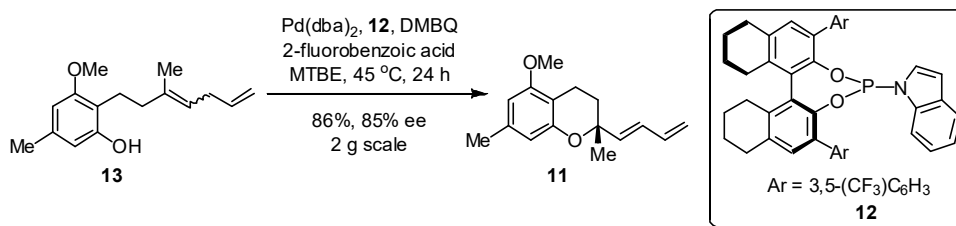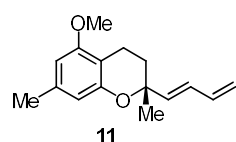

**Olefin 11.** To a dried 100 mL round bottle flask was added Pd(dba)<sub>2</sub> (102.3 mg, 0.18 mmol, 0.02 equiv), **12** (239.0 mg, 0.28 mmol, 0.03 equiv), 2,6-dimethoxybenzo-1,4-quinone (DMBQ) (1.469 g, 10.8 mmol, 1.2 equiv),

2-fluorobenzoic acid (50.9 mg, 0.36 mmol, 0.04 equiv), then it was pumped and replaced with N<sub>2</sub> atmosphere for three times, followed by anhydrous *tert*-butyl methyl ether (MTBE) (45 mL) addition. The solution was heated to 45 °C and remained for 0.5 h. The mixture was cooled to 23 °C, and **13**<sup>[1]</sup> (neat, 2.2168 g, 9 mmol, 1 equiv) was added. After addition, the solution was heated to 45 °C and remained for 24 h. After the mixture cooled to 23 °C, it was concentrated, and purified by silica gel column chromatography (2% to 15% CH<sub>2</sub>Cl<sub>2</sub>-petroleum ether) to give **11** as a colorless oil (1.883 g, 86%). *R<sub>f</sub>* = 0.84 (5% Ethyl acetate-petroleum ether); [ $\alpha$ ]<sub>D</sub><sup>21</sup> = +13.0 (*c* = 0.78, CHCl<sub>3</sub>). Enantiomeric excess: 85%, determined by HPLC (CHIRALPAK OD-H, hexane/isopropanol = 99.5/0.5, flow rate 0.5 mL/min, T = 30 °C, 230 nm): *t<sub>R</sub>* = 12.75 min (minor), *t<sub>R</sub>* = 17.10 min (major). <sup>1</sup>H NMR (400 MHz, CDCl<sub>3</sub>)  $\delta$  6.35 (s, 1H), 6.32 – 6.13 (m, 3H), 5.73 (d, *J* = 15.2 Hz, 1H), 5.13 (d, *J* = 16.0 Hz, 1.5 Hz, 1H), 5.02 (d, *J* = 9.3 Hz, 1.5 Hz, 1H), 3.77 (s, 3H), 2.62 (dt, *J* = 17.0, 5.6 Hz, 1H), 2.51 – 2.39 (m, 1H), 2.27 (s, 3H), 1.90 (dt, *J* = 13.2, 5.7 Hz, 1H), 1.77 (ddd, *J* = 13.7, 9.5, 5.9 Hz, 1H), 1.41 (s, 3 H) ppm. <sup>13</sup>C NMR (100 MHz, CDCl<sub>3</sub>)  $\delta$  157.5, 154.2, 137.6, 137.0, 136.6, 129.4, 117.0, 110.1, 107.3, 102.7, 75.7, 55.3, 31.7, 26.7, 21.6, 16.8 ppm. IR  $\nu_{\text{max}}$  2928, 2850, 1616, 1583, 1457, 1419, 1351, 1223, 1159, 1107, 1004, 813 cm<sup>-1</sup>; HRMS (EI): *m/z* calcd for C<sub>16</sub>H<sub>20</sub>O<sub>2</sub> [M]<sup>+</sup>: 244.1463, found 244.1464. The absolute configuration of **11** was determined by comparing the optical rotation value with Gong' data.<sup>[1]</sup>

#### HPLC of olefin 11.

### <Chromatogram>

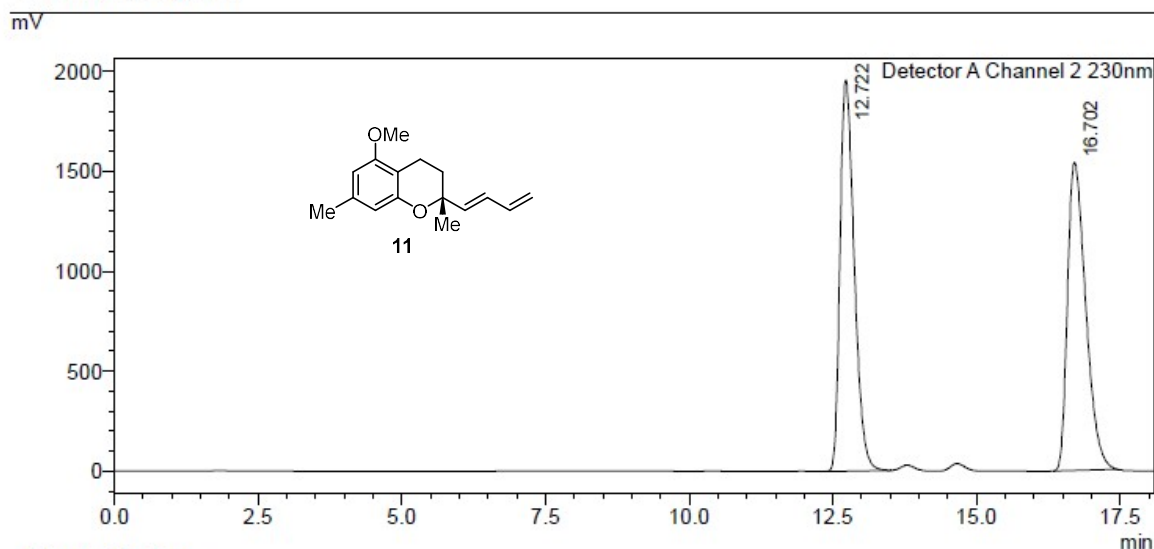

### <Peak Table>

Detector A Channel 2 230nm

| Peak# | Ret. Time | Area     | Height  | Conc.  |
|-------|-----------|----------|---------|--------|
| 1     | 12.722    | 33560336 | 1954637 | 49.722 |
| 2     | 16.702    | 33935829 | 1540150 | 50.278 |
| Total |           | 67496165 | 3494787 |        |

### <Chromatogram>

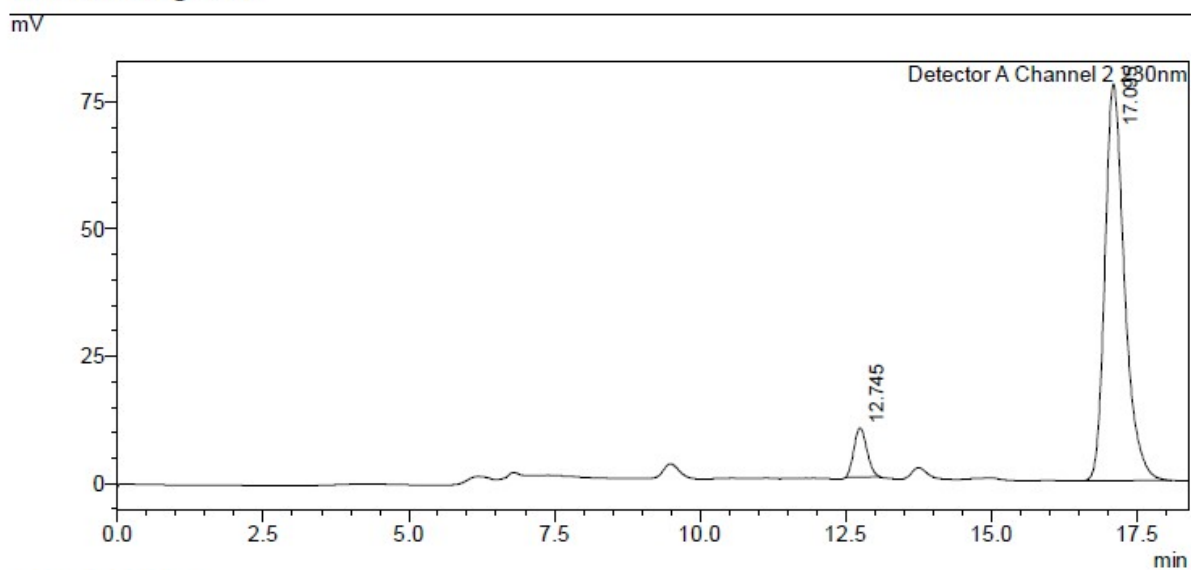

### <Peak Table>

Detector A Channel 2 230nm

| Peak# | Ret. Time | Area    | Height | Conc.  |
|-------|-----------|---------|--------|--------|
| 1     | 12.745    | 149426  | 9639   | 7.583  |
| 2     | 17.095    | 1821010 | 77877  | 92.417 |
| Total |           | 1970436 | 87517  |        |

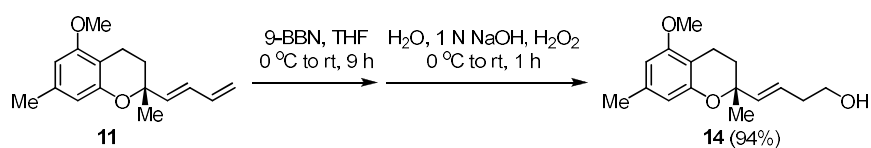

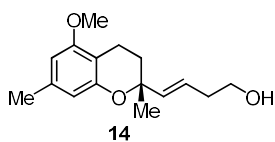

**Alcohol 14.** To a neat **11** (1.82 g, 7.5 mmol, 1 equiv) in 200 mL dried round bottle flask was added 9-BBN (0.5 M in THF, 30 mL, 15 mmol, 2 equiv) dropwise at 0 °C under N<sub>2</sub> atmosphere. After addition, the solution was

stirred at 20 °C overnight, then the solution was cooled to 0 °C. H<sub>2</sub>O (1.8 mL) was added dropwise followed by 1 N NaOH (25.8 mL) and H<sub>2</sub>O<sub>2</sub> (30% w/w in H<sub>2</sub>O, 12.8 mL) addition. After the solution stirred at 20 °C for 1 h, it was cooled to 0 °C and quenched by saturated aqueous Na<sub>2</sub>SO<sub>3</sub> (50 mL). The mixture was extracted with EtOAc (100 mL×3). The combined organic phase was washed with brine (200 mL×2). The organic phase was dried over Na<sub>2</sub>SO<sub>4</sub>, filtered, concentrated, and purified by silica gel column chromatography (10% to 20% Ethyl acetate-petroleum ether) to give **14** (1.8416 g, 94%) as a colorless oil.  $R_f = 0.29$  (20% Ethyl acetate-petroleum ether);  $[\alpha]_D^{21} = +32.2$  ( $c = 1.33$ , CHCl<sub>3</sub>). <sup>1</sup>H NMR (400 MHz, CDCl<sub>3</sub>)  $\delta$  6.35 (s, 1H), 6.23 (s, 1H), 5.68 – 5.53 (m, 2H), 3.79 (s, 3H), 3.57 (t,  $J = 6.4$  Hz, 2H), 2.64 (dt,  $J = 17.0, 5.6$  Hz, 1H), 2.51 – 2.40 (m, 1H), 2.28 (s, 3H), 2.25 (dd,  $J = 12.3, 6.4$  Hz, 2H), 1.88 (dt,  $J = 13.6, 5.8$  Hz, 1H), 1.76 (ddd,  $J = 13.6, 9.4, 5.9$  Hz, 1H), 1.40 (s, 3H) ppm. <sup>13</sup>C NMR (100 MHz, CDCl<sub>3</sub>)  $\delta$  157.4, 154.2, 136.9, 136.5, 125.3, 110.0, 107.2, 102.6, 75.7, 61.8, 55.3, 35.6, 31.6, 26.7, 21.6, 16.7 ppm. IR  $\nu_{\max}$  3340, 2932, 1617, 1583, 1457, 1350, 1227, 1106, 1046, 968, 813 cm<sup>-1</sup>; HRMS (EI):  $m/z$  calcd for C<sub>16</sub>H<sub>22</sub>O<sub>3</sub> [M]<sup>+</sup>: 262.1569, found 262.1568.

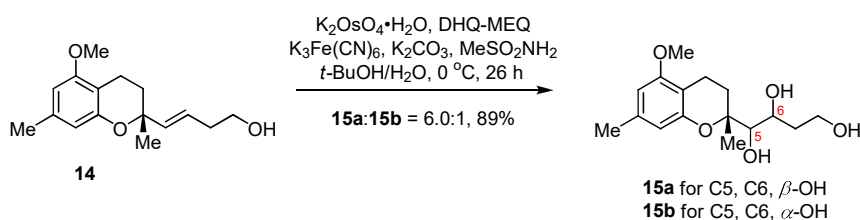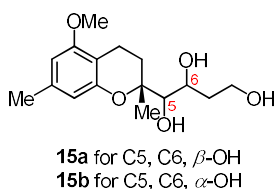

**Triol 15a/15b.** To a solution of *t*-BuOH/H<sub>2</sub>O (84 mL, 1:1) was added K<sub>2</sub>OsO<sub>4</sub>·2H<sub>2</sub>O (138.1 mg, 0.44 mmol, 0.05 equiv), DHQ-MEQ (855.9 mg, 1.77 mmol, 0.2 equiv), K<sub>3</sub>Fe(CN)<sub>6</sub> (8.70 g, 2.64 mmol, 3 equiv), K<sub>2</sub>CO<sub>3</sub> (3.72 g, 2.69 mmol, 3 equiv), MeSO<sub>2</sub>NH<sub>2</sub> (840.1 mg, 8.83 mmol, 1 equiv),

then the solution was stirred at 19 °C for 1 h. After the solution cooled to 0 °C, **14** (neat, 2.23 g, 8.5 mmol, 1 equiv) was added and the mixture was stirred at 0 °C for more 26 h. TLC shows all **14** was consumed, then it was quenched by Na<sub>2</sub>SO<sub>3</sub> (40 mL). The mixture was extracted with EtOAc (60

mL×4). The combined organic phase was washed with brine (100 mL×2). The organic phase was dried over Na<sub>2</sub>SO<sub>4</sub>, filtered, concentrated, and purified by silica gel column chromatography (25% to 50% Ethyl acetate-petroleum ether) to give **15** (2.256 g, 89%) as a white solid. *R<sub>f</sub>* = 0.13 (50% Ethyl acetate-petroleum ether). <sup>1</sup>H NMR (400 MHz, CDCl<sub>3</sub>) (major) δ 6.25 (s, 2H), 4.35 (dd, *J* = 8.8, 2.7 Hz, 1H), 3.92 – 3.83 (m, 2H), 3.80 (s, 3H), 3.48 – 3.38 (br, OH, 1H), 3.38 – 3.32 (m, 1H), 3.26 – 2.93 (br, OH, 2H) 2.74 (ddd, *J* = 17.2, 6.1, 2.6 Hz, 1H), 2.55 – 2.44 (m, 1H), 2.26 (s, 3H), 2.21 – 2.10 (m, 1H), 2.10 – 1.99 (m, 1H), 1.72 (ddt, *J* = 9.1, 6.4, 3.4 Hz, 2H), 1.28 (s, 3H) ppm. <sup>13</sup>C NMR (100 MHz, CDCl<sub>3</sub>) (major) δ 157.6, 152.9, 137.2, 110.1, 107.1, 103.2, 79.6, 77.1, 69.1, 60.5, 55.3, 36.8, 26.7, 21.5, 19.6, 15.8 ppm. IR ν<sub>max</sub> 3927, 1584, 1459, 1413, 1352, 1232, 1145, 1105, 1019, 814 cm<sup>-1</sup>; HRMS (EI): *m/z* calcd for C<sub>16</sub>H<sub>24</sub>O<sub>5</sub> [M]<sup>+</sup>: 296.1624, found 296.1627.

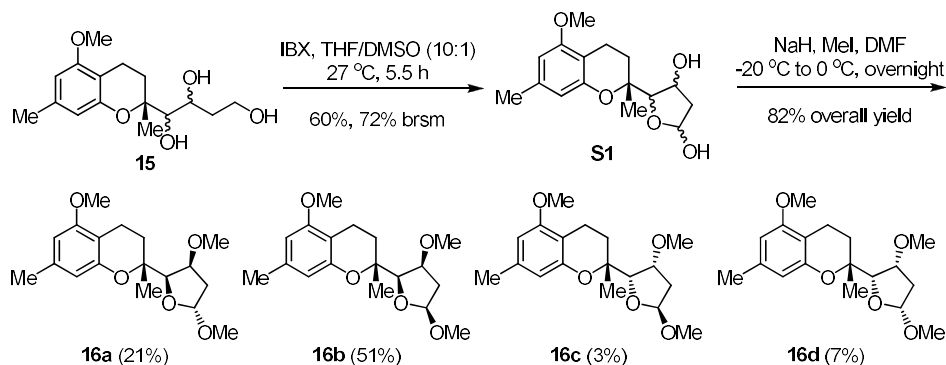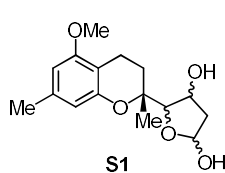

**Hemiacetal S1.** To a neat **15** (1.4237 g, 4.8 mmol, 1 equiv) in 200 mL round bottle was added 2-iodoxybenzoic acid (IBX) (1.614 g, 5.8 mmol, 1.2 equiv) then it was replaced with N<sub>2</sub> atmosphere for three times. The anhydrous co-sol.

THF/DMSO (10:1, 49.5 mL) was added and the mixture was stirred at 27 °C for 5.5 h. It was quenched by saturated aqueous NaHCO<sub>3</sub> (40 mL) and NaS<sub>2</sub>O<sub>3</sub> (10 mL). The mixture was extracted with EtOAc (50 mL×3). The combined organic phase was washed with brine (100 mL×2). The organic phase was dried over Na<sub>2</sub>SO<sub>4</sub>, filtered, concentrated, and purified by silica gel column chromatography (0.5% to 5% MeOH-CH<sub>2</sub>Cl<sub>2</sub>) to give **S1** (845.0 mg, 60%, 72% brsm) as a white solid and recovered **15** (245.3 mg).

**Acetal 16a/16b/16c/16d.** To a mixture of NaH (525.4 mg, 13.14 mmol, 3 equiv) in anhydrous DMF (18 mL) was added **S1** (1.2873 g, 4.37 mmol, 1 equiv) in anhydrous DMF (4 mL) dropwise at -20

°C. After addition, the reaction mixture was slowly warmed to 0 °C and remained at 0 °C overnight. It was quenched by saturated aqueous NH<sub>4</sub>Cl (10 mL). The mixture was extracted with EtOAc (30 mL×3). The combined organic phase was washed with brine (50 mL×3). The organic phase was dried over Na<sub>2</sub>SO<sub>4</sub>, filtered, concentrated, and purified by silica gel column chromatography (1% to 8% Ethyl acetate-petroleum ether) to give **16a** (295 mg, 21%) as a white solid, **16b** (713 mg, 51%) as a white solid, **16c** (37 mg, 3%) as a white solid, **16d** (95 mg, 7%) as a white solid. **16d** was obtained as a white single crystal from CH<sub>2</sub>Cl<sub>2</sub>/hexane solution.

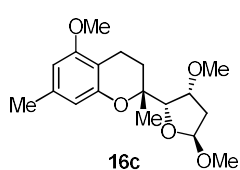

**Acetal 16c.**  $R_f = 0.67$  (20% Ethyl acetate-petroleum ether);  $[\alpha]_D^{21} = -6.8$  ( $c = 0.25$ , CHCl<sub>3</sub>). <sup>1</sup>H NMR (400 MHz, CDCl<sub>3</sub>)  $\delta$  6.32 (s, 1H), 6.22 (s, 1H), 5.17 (dd,  $J = 5.7, 3.1$  Hz, 1H), 4.07 – 3.94 (m, 2H), 3.80 (s, 3H), 3.37 (s, 3H), 3.32 (s, 3H), 2.69 (dt,  $J = 17.1, 5.7$  Hz, 1H), 2.53 (ddd,  $J = 17.1, 9.8, 7.0$  Hz, 1H), 2.34 – 2.21 (m, 4H), 2.12 – 1.92 (m, 3H), 1.36 (s, 3H) ppm. <sup>13</sup>C NMR (100 MHz, CDCl<sub>3</sub>)  $\delta$  157.5, 154.1, 136.8, 110.4, 107.3, 103.7, 102.4, 83.4, 81.2, 76.9, 56.9, 55.3 (2 C), 39.0, 27.5, 21.6, 19.8, 15.9 ppm. IR  $\nu_{\max}$  2922, 2853, 1585, 1458, 1350, 1228, 1198, 1105, 1040, 965, 818 cm<sup>-1</sup>; HRMS (EI):  $m/z$  calcd for C<sub>18</sub>H<sub>26</sub>O<sub>5</sub> [M]<sup>+</sup>: 322.1780, found 322.1776.

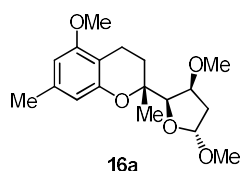

**Acetal 16a.**  $R_f = 0.61$  (20% Ethyl acetate-petroleum ether);  $[\alpha]_D^{22} = -33.5$  ( $c = 0.26$ , CHCl<sub>3</sub>). <sup>1</sup>H NMR (400 MHz, CDCl<sub>3</sub>)  $\delta$  6.37 (s, 1H), 6.22 (s, 1H), 5.22 (dd,  $J = 5.8, 2.8$  Hz, 1H), 4.00 (dt,  $J = 7.4, 2.8$  Hz, 2H), 3.80 (s, 3H), 3.36 (s, 3H), 3.25 (s, 3H), 2.61 (t,  $J = 6.9$  Hz, 2H), 2.31 – 2.15 (m, 4H), 2.04 – 1.79 (m, 3H), 1.42 (s, 3H) ppm. <sup>13</sup>C NMR (100 MHz, CDCl<sub>3</sub>)  $\delta$  157.2, 153.4, 136.9, 110.6, 106.8, 103.6, 102.4, 82.7, 80.2, 77.0, 56.5, 55.2 (2 C), 38.7, 27.7, 21.6, 20.1, 16.1 ppm. IR  $\nu_{\max}$  2929, 1738, 1585, 1460, 1355, 1236, 1106, 1042, 966, 812 cm<sup>-1</sup>; HRMS (EI):  $m/z$  calcd for C<sub>18</sub>H<sub>26</sub>O<sub>5</sub> [M]<sup>+</sup>: 322.1780, found 322.1777.

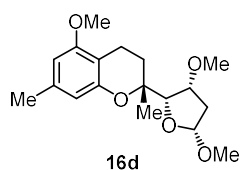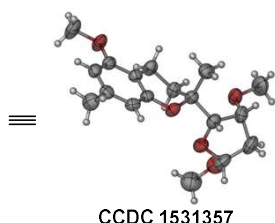

**Acetal 16d.**  $R_f = 0.40$  (20% Ethyl acetate-petroleum ether);  $[\alpha]_D^{21} = +37.9$  ( $c = 0.46$ , CHCl<sub>3</sub>). <sup>1</sup>H NMR (400 MHz, CDCl<sub>3</sub>)  $\delta$  6.34 (s, 1H), 6.23 (s, 1H), 5.10 (d,  $J = 5.8$  Hz, 1H), 4.09 (d,  $J = 4.3$  Hz, 1H), 3.90 (t,  $J = 4.7$  Hz,



1H), 3.80 (s, 3H), 3.40 (s, 3H), 3.35 (s, 3H), 2.74 (dd,  $J = 17.2, 2.6$  Hz, 1H), 2.58 – 2.44 (m, 1H), 2.34 – 2.00 (m, 7H), 1.30 (s, 3H) ppm.  $^{13}\text{C}$  NMR (100 MHz,  $\text{CDCl}_3$ )  $\delta$  157.3, 153.9, 136.7, 110.5, 107.4, 105.0, 102.4, 87.9, 80.1, 78.1, 57.3, 55.9, 55.2, 37.2, 25.7, 21.6, 18.9, 15.8 ppm. IR  $\nu_{\text{max}}$  2929, 2888, 1617, 1584, 1455, 1355, 1228, 1199, 1103, 1043, 947, 818  $\text{cm}^{-1}$ ; HRMS (EI):  $m/z$  calcd for  $\text{C}_{18}\text{H}_{26}\text{O}_5$   $[\text{M}]^+$ : 322.1780, found 322.1783.

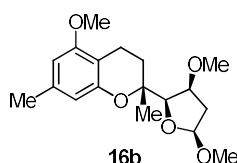

**Acetal 16b.**  $R_f = 0.35$  (20% Ethyl acetate-petroleum ether);  $[\alpha]_{\text{D}}^{22} = +95.6$  ( $c = 0.75$ ,  $\text{CHCl}_3$ ).  $^1\text{H}$  NMR (400 MHz,  $\text{CDCl}_3$ )  $\delta$  6.43 (s, 1H), 6.23 (s, 1H), 5.13 (d,  $J = 5.8$  Hz, 1H), 4.04 (d,  $J = 4.5$  Hz, 1H), 3.88 (t,  $J = 4.8$  Hz, 1H), 3.80 (s, 3H),

3.48 (s, 3H), 3.31 (s, 3H), 2.63 (t,  $J = 6.8$  Hz, 2H), 2.26 (s, 3H), 2.22 (d,  $J = 14.3$  Hz, 1H), 1.96 (ddd,  $J = 14.7, 9.5, 3.5$  Hz, 3H), 1.45 (s, 3H).  $^{13}\text{C}$  NMR (100 MHz,  $\text{CDCl}_3$ )  $\delta$  157.4, 153.5, 137.1, 110.8, 107.0, 104.9, 102.5, 86.7, 79.4, 78.1, 57.1, 55.9, 55.3, 36.8, 27.4, 21.6, 19.8, 16.2 ppm. IR  $\nu_{\text{max}}$  2925, 1614, 1582, 1458, 1352, 1222, 1037, 948, 907, 815  $\text{cm}^{-1}$ ; HRMS (EI):  $m/z$  calcd for  $\text{C}_{18}\text{H}_{26}\text{O}_5$   $[\text{M}]^+$ : 322.1780, found 322.1784.

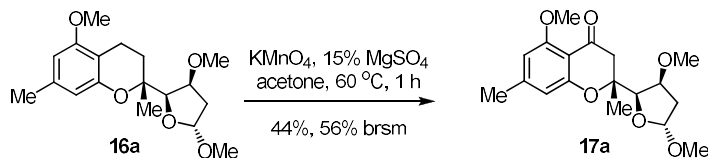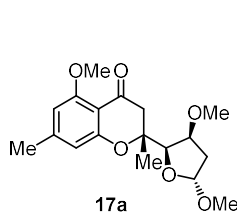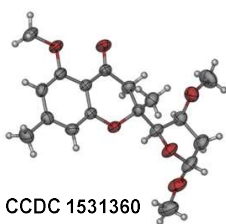

**Acetal 17a.** To a solution of **16a** (48.0 mg, 0.15 mmol, 1 equiv) in acetone (0.8 mL) was added 15%  $\text{MgSO}_4$  (w/w in  $\text{H}_2\text{O}$ , 0.2 mL) at 22 °C, then  $\text{KMnO}_4$  (141.4 mg, 0.9 mmol, 6 equiv) was added. The solution was stirred at 22

°C for 5 min. The mixture was heated to 60 °C and remained for 1 h, then it was cooled to 22 °C. It was quenched by saturated aqueous  $\text{Na}_2\text{SO}_3$  (1 mL), then the mixture was filtered through Celite, and acetone was removed under vacuum. The remained solution was extracted with EtOAc (5 mL $\times$ 3). The combined organic phase was washed with brine (10 mL). The organic phase was dried over  $\text{Na}_2\text{SO}_4$ , filtered, concentrated, and purified by silica gel column chromatography (10% to 20% Ethyl acetate-petroleum ether, 1% to 3%  $\text{MeOH-CH}_2\text{Cl}_2$ ) to give **16a** (10.4 mg) and **17a** (22.0 mg,

44%, 56% brsm) as a white solid. **17a** was obtained as a white single crystal from EtOAc/hexane solution.  $R_f = 0.28$  (50% Ethyl acetate-petroleum ether);  $[\alpha]_D^{22} = -70.7$  ( $c = 0.29$ ,  $\text{CHCl}_3$ ).  $^1\text{H}$  NMR (400 MHz,  $\text{CDCl}_3$ )  $\delta$  6.41 (s, 1H), 6.27 (s, 1H), 5.18 (dd,  $J = 5.7, 3.0$  Hz, 1H), 4.14 (d,  $J = 4.3$  Hz, 1H), 3.94 (ddd,  $J = 6.1, 4.5, 2.0$  Hz, 1H), 3.88 (s, 3H), 3.34 (s, 3H), 3.21 (s, 3H), 2.95 (d,  $J = 16.1$  Hz, 1H), 2.73 (d,  $J = 16.0$  Hz, 1H), 2.29 (s, 3H), 2.23 (ddd,  $J = 14.2, 5.8, 2.0$  Hz, 1H), 1.95 (ddd,  $J = 14.3, 5.9, 3.0$  Hz, 1H), 1.52 (s, 3H) ppm.  $^{13}\text{C}$  NMR (100 MHz,  $\text{CDCl}_3$ )  $\delta$  190.5, 160.8, 159.9, 147.6, 111.0, 108.5, 104.3, 104.0, 81.9, 81.7, 80.2, 56.6, 56.0, 55.3, 45.9, 38.4, 22.4, 20.8 ppm. IR  $\nu_{\text{max}}$  2923, 1680, 1610, 1566, 1461, 1413, 1355, 1227, 1110, 1038, 961, 817  $\text{cm}^{-1}$ ; HRMS (EI):  $m/z$  calcd for  $\text{C}_{18}\text{H}_{24}\text{O}_6$   $[\text{M}]^+$ : 336.1573, found 336.1567.

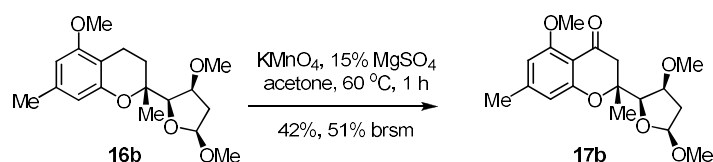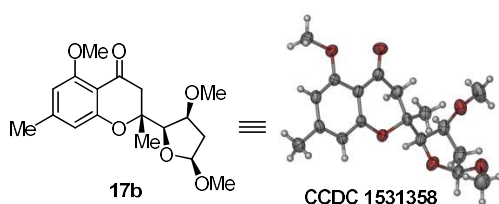

**Acetal 17b.** To a solution of **16b** (745.8 mg, 2.3 mmol, 1 equiv) in acetone (16.2 mL) was added 15%  $\text{MgSO}_4$  (w/w in  $\text{H}_2\text{O}$ , 6.9 mL) at 18 °C, then  $\text{KMnO}_4$  (2.33 g, 14.7 mmol, 6.4 equiv) was added. The solution was stirred at 18 °C for

5 min. The mixture was heated to 60 °C and remained for 1 h, then it was cooled to 18 °C. It was quenched by saturated aqueous  $\text{Na}_2\text{SO}_3$  (1 mL), then the mixture was filtered through Celite, and acetone was removed under vacuum. The remained solution was extracted with EtOAc (20 mL $\times$ 3). The combined organic layer was washed with brine (30 mL). The organic phase was dried over  $\text{Na}_2\text{SO}_4$ , filtered, concentrated, and purified by silica gel column chromatography (10% to 20% Ethyl acetate-petroleum ether, 1% to 3%  $\text{MeOH-CH}_2\text{Cl}_2$ ) to give **16b** (134.9 mg) and **17b** as a white solid (323.1 mg, 42%, 51% brsm). **17b** was obtained as a white single crystal from EtOAc/hexane solution.  $R_f = 0.20$  (50% Ethyl acetate-petroleum ether);  $[\alpha]_D^{21} = +94.8$  ( $c = 0.43$ ,  $\text{CHCl}_3$ ).  $^1\text{H}$  NMR (400 MHz,  $\text{CDCl}_3$ )  $\delta$  6.47 (s, 1H), 6.29 (s, 1H), 5.11 (d,  $J = 5.8$  Hz, 1H), 4.23 (d,  $J = 4.6$  Hz, 1H), 3.89 (s, 3H), 3.86 (t,  $J = 4.9$  Hz, 1H), 3.44 (s, 3H), 3.29 (s, 3H), 2.91 (d,  $J = 15.9$  Hz, 1H), 2.81 (d,  $J = 15.9$  Hz, 1H), 2.29 (s, 3H), 2.22 (d,  $J = 14.4$  Hz, 1H), 1.96 (dt,  $J = 14.4, 5.6$  Hz,

1H), 1.58 (s, 3H) ppm.  $^{13}\text{C}$  NMR (125 MHz,  $\text{CDCl}_3$ )  $\delta$  190.6 160.8, 160.0, 147.7, 111.1, 108.6, 105.2, 104.4, 85.4, 82.8, 79.4, 57.2, 56.0, 55.9, 45.8, 36.8, 22.4, 20.5 ppm. IR  $\nu_{\text{max}}$  2930, 1678, 1612, 1567, 1463, 1353, 1226, 1109, 1037, 946, 820  $\text{cm}^{-1}$ ; HRMS (EI):  $m/z$  calcd for  $\text{C}_{18}\text{H}_{24}\text{O}_6$   $[\text{M}]^+$ : 336.1573, found 336.1570.

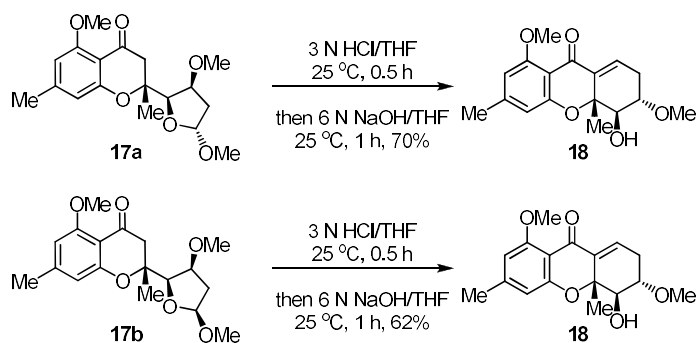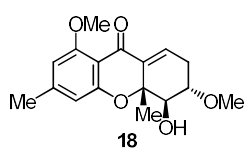

**Tetrahydroxanthone 18.** To a solution of **17a** (43.7 mg, 0.13 mmol) in THF (0.3 mL) was added 3 N HCl (0.6 mL) at 25 °C, after the solution stirred at 25 °C for 0.5 h, TLC shows all **17a** was consumed, and THF (0.45 mL) was added

followed by 6 N NaOH (0.45 mL) addition at 25 °C. After the solution stirred at 25 °C for 1 h, it was quenched by saturated aqueous  $\text{NH}_4\text{Cl}$  (5 mL). The mixture was extracted with EtOAc (10 mL $\times$ 3). The combined organic phase was washed with brine (20 mL). The organic phase was dried over  $\text{Na}_2\text{SO}_4$ , filtered, concentrated, and purified by silica gel column chromatography (25% to 50% Ethyl acetate-petroleum ether) to give **18** (27.5 mg, 70%) as a light yellow solid.

To a solution of **17b** (132.4 mg, 0.39 mmol) in THF (1 mL) was added 3 N HCl (2 mL) at 25 °C. After the solution stirred at 25 °C for 0.5 h, TLC shows all **17b** was consumed, and THF (1.5 mL) was added followed by 6 N NaOH (1.5 mL) addition at 25 °C. After the solution stirred at 25 °C for 1 h, it was quenched by saturated aqueous  $\text{NH}_4\text{Cl}$  (5 mL). The mixture was extracted with EtOAc (15 mL $\times$ 3). The combined organic phase was washed with brine (30 mL). The organic phase was dried over  $\text{Na}_2\text{SO}_4$ , filtered, concentrated, and purified by silica gel column chromatography (25% to 50% Ethyl acetate-petroleum ether) to give **18** (74.1 mg, 62%) as a light yellow solid.

$R_f$  = 0.36 (60% Ethyl acetate-petroleum ether);  $[\alpha]_D^{21}$  = -66.3 ( $c$  = 0.24,  $\text{CHCl}_3$ ). Enantiomeric excess: > 99%, determined by HPLC (CHIRALPAK AD-H, hexane/isopropanol = 70/30, flow rate

0.6 mL/min, T = 25 °C, 210 nm):  $t_R$  = 8.90 min (major),  $t_R$  = 13.07 min (minor).  $^1\text{H}$  NMR (400 MHz,  $\text{CDCl}_3$ )  $\delta$  6.76 (dd,  $J$  = 5.1, 2.9 Hz, 1H), 6.46 (s, 1H), 6.34 (s, 1H), 4.08 (d,  $J$  = 10.3 Hz, 1H), 3.91 (s, 3H), 3.48 (s, 3H), 3.45 – 3.37 (m, 1H), 2.94 (s, OH, 1H), 2.89 (ddd,  $J$  = 19.3, 6.0, 5.3 Hz, 1H), 2.30 (s, 3H), 2.24 (ddd,  $J$  = 19.3, 9.2, 2.9 Hz, 1H), 1.48 (s, 3H) ppm.  $^{13}\text{C}$  NMR (100 MHz,  $\text{CDCl}_3$ )  $\delta$  179.4, 161.2, 160.8, 147.9, 136.9, 131.1, 111.4, 108.8, 105.4, 81.8, 76.9, 76.0, 57.1, 56.1, 30.5, 22.4, 19.2 ppm. IR  $\nu_{\text{max}}$  3561, 2922, 1675, 1611, 1565, 1468, 1260, 1234, 1099, 1003, 909, 814, 736  $\text{cm}^{-1}$ ; HRMS (EI):  $m/z$  calcd for  $\text{C}_{17}\text{H}_{20}\text{O}_5$   $[\text{M}]^+$ : 304.1311, found 304.1308.

### HPLC of tetrahydroxanthone 18.

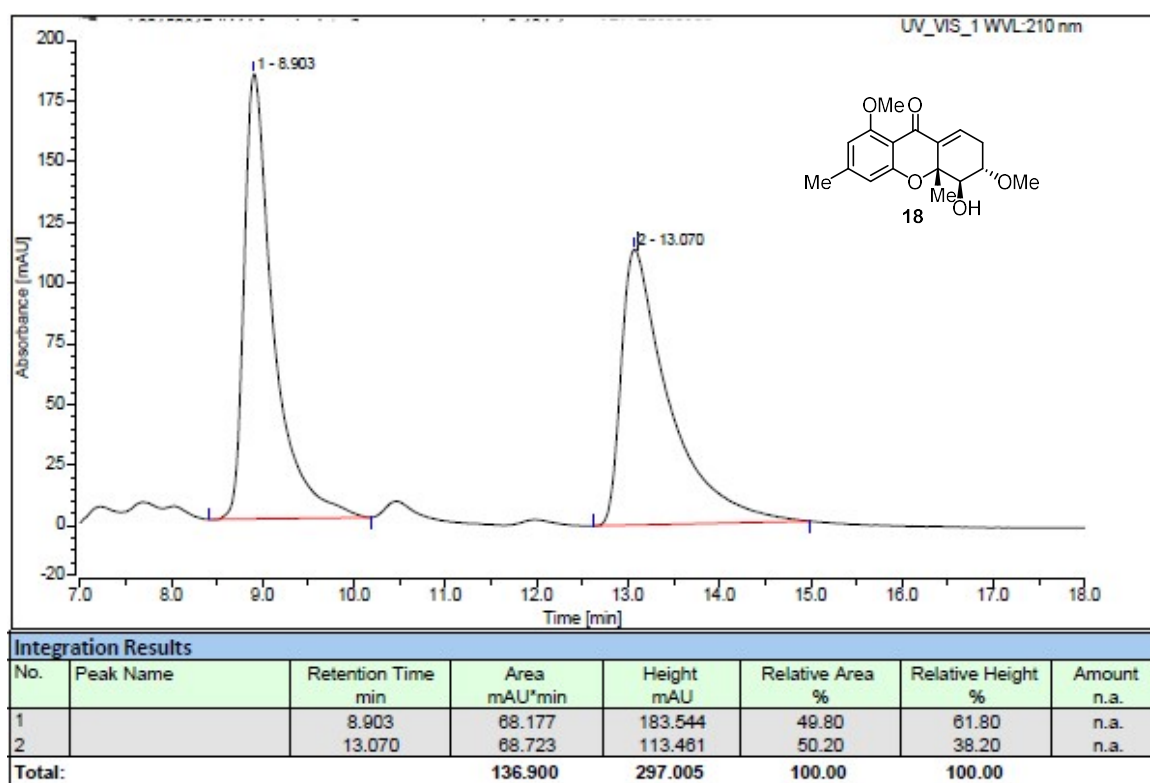

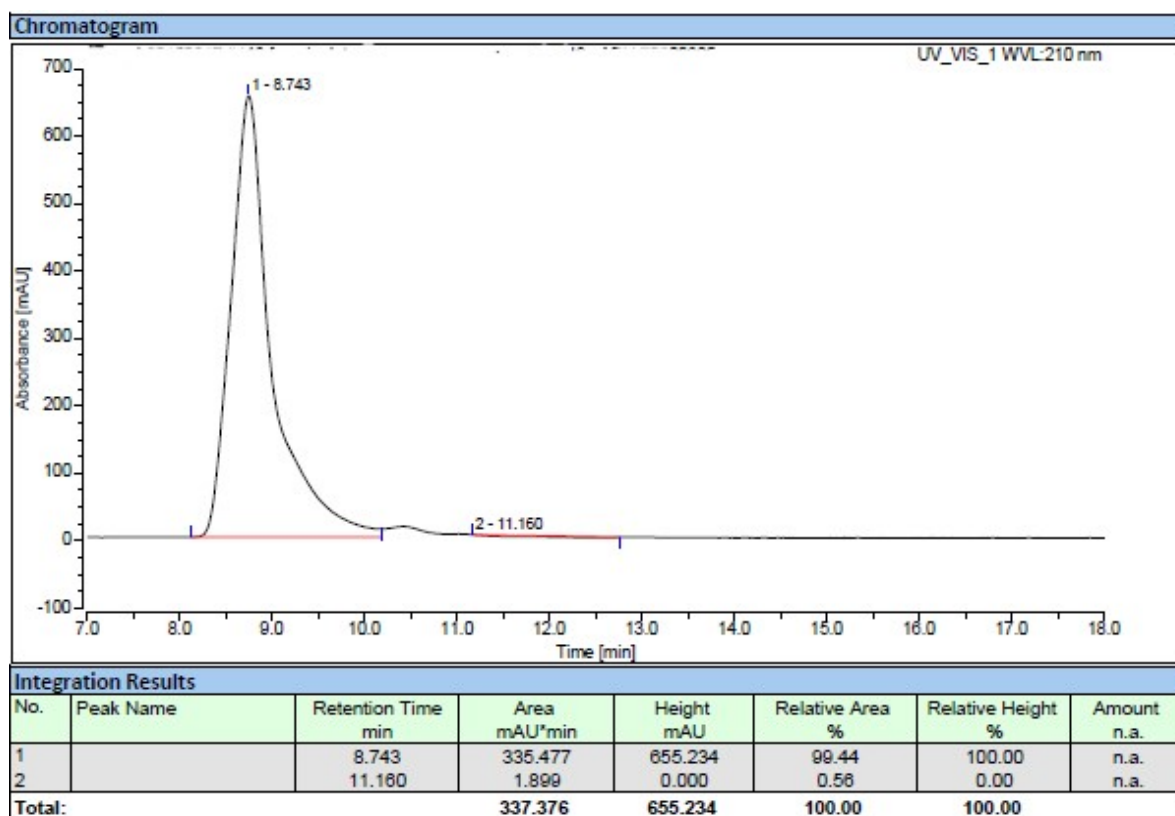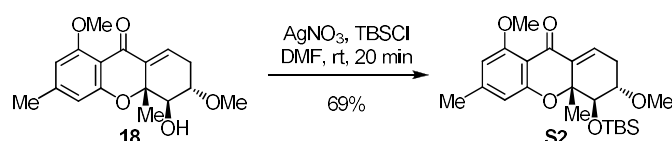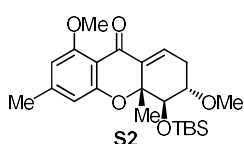

**Tetrahydroxanthone S2.** To a solution of **18** (46.9 mg, 0.15 mmol, 1 equiv) in anhydrous DMF (1.5 mL) was added AgNO<sub>3</sub> (79.4 mg, 0.47 mmol, 3 equiv) and TBSCl (42.4 mg, 0.28 mmol, 2 equiv) successively at 24 °C. After the

solution stirred at 24 °C for 20 min, TLC shows all **18** was consumed, and it was quenched by saturated aqueous NaHCO<sub>3</sub> (1 mL). The mixture was extracted with EtOAc (5 mL×3). The combined organic phase was washed with brine (10 mL×3). The organic phase was dried over Na<sub>2</sub>SO<sub>4</sub>, filtered, concentrated, and purified by silica gel column chromatography (15% to 20% Ethyl acetate-petroleum ether) to give **S2** as a light yellow solid (44.4 mg, 69%). *R<sub>f</sub>* = 0.62 (50% Ethyl acetate-petroleum ether);  $[\alpha]_D^{24} = -26.8$  (*c* = 0.42, CHCl<sub>3</sub>). <sup>1</sup>H NMR (300 MHz, CDCl<sub>3</sub>) δ 6.74 (dd, *J* = 5.0, 3.0 Hz, 1H), 6.31 (s, 2H), 4.02 (d, *J* = 10.1 Hz, 1H), 3.90 (s, 3H), 3.42 (s, 3H), 3.29 (td, *J* = 9.4, 6.4 Hz, 1H), 2.85 (ddd, *J* = 19.7, 6.3, 5.2 Hz, 1H), 2.31 (s, 3H), 2.22 (ddd, *J* = 19.8, 9.1, 3.0 Hz, 1H), 1.43 (s, 3H), 1.00 (s, 9H), 0.22 (s, 3H), 0.17 (s, 3H) ppm. <sup>13</sup>C NMR (100 MHz, CDCl<sub>3</sub>) δ

179.8, 161.2 (2 C), 147.6, 137.1, 131.4, 111.0, 108.8, 105.1, 82.6, 77.7, 77.6, 57.9, 56.0, 31.6, 26.0 (3 C), 22.4, 19.7, 18.5, -4.3, -4.6 ppm. IR  $\nu_{\max}$  2959, 2925, 2853, 1615, 1461, 1257, 1149, 1087, 1018, 805  $\text{cm}^{-1}$ ; HRMS (EI):  $m/z$  calcd for  $\text{C}_{23}\text{H}_{34}\text{O}_5\text{Si}$   $[\text{M}]^+$ : 418.2176, found 418.2174.

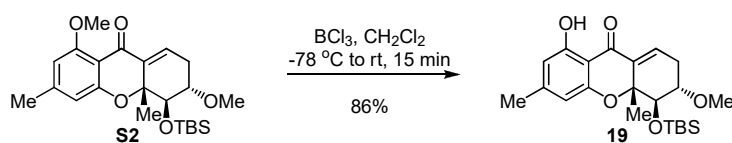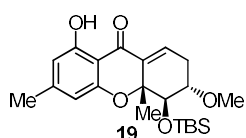

**Tetrahydroxanthone 19.** To a solution of **S2** (72.8 mg, 0.17 mmol, 1 equiv)

in anhydrous  $\text{CH}_2\text{Cl}_2$  (3.5 mL) cooled to  $-78\text{ }^\circ\text{C}$  was added  $\text{BCl}_3$  (1.0 M in hexane, 0.35 mL, 0.35 mmol, 2 equiv) dropwise. After addition, the cooled

bath was removed; the solution was warmed to  $28\text{ }^\circ\text{C}$ . After TLC shows all **S2** was consumed, it was quenched by saturated aqueous  $\text{NaHCO}_3$  (2 mL) and stirred at  $28\text{ }^\circ\text{C}$  for 5 min. The mixture was extracted with EtOAc (10 mL $\times$ 3). The combined organic phase was washed with brine (15 mL). The organic phase was dried over  $\text{Na}_2\text{SO}_4$ , filtered, concentrated, and purified by silica gel column chromatography (0.5% to 2% Ethyl acetate-petroleum ether) to give **19** (60.3 mg, 86%) as a yellow solid.  $R_f$  = 0.78 (50% Ethyl acetate-petroleum ether);  $[\alpha]_D^{24}$  = +6.5 ( $c$  = 0.51,  $\text{CHCl}_3$ ).  $^1\text{H}$  NMR (500 MHz,  $\text{CDCl}_3$ )  $\delta$  12.08 (s, 1H), 6.83 (dd,  $J$  = 5.0, 3.0 Hz, 1H), 6.31 (s, 1H), 6.17 (s, 1H), 4.04 (d,  $J$  = 10.0 Hz, 1H), 3.43 (s, 3H), 3.32 (td,  $J$  = 9.4, 6.5 Hz, 1H), 2.91 (ddd,  $J$  = 20.0, 6.4, 5.2 Hz, 1H), 2.35 – 2.24 (m, 4H), 1.44 (s, 3H), 1.00 (s, 9H), 0.22 (s, 3H), 0.16 (s, 3H) ppm.  $^{13}\text{C}$  NMR (125 MHz,  $\text{CDCl}_3$ )  $\delta$  185.4, 162.9, 159.2, 150.7, 135.6, 133.7, 109.9, 108.6, 105.2, 83.0, 77.6, 77.2 (CH, dept 135) 58.0, 31.8, 26.0 (3 C), 22.6, 20.2, 18.6, -4.3, -4.6 ppm. IR  $\nu_{\max}$  2928, 1638, 1605, 1373, 1207, 1143, 1087, 885, 836, 775  $\text{cm}^{-1}$ ; HRMS (EI):  $m/z$  calcd for  $\text{C}_{22}\text{H}_{32}\text{O}_5\text{Si}$   $[\text{M}]^+$ : 404.2019, found 404.2012.

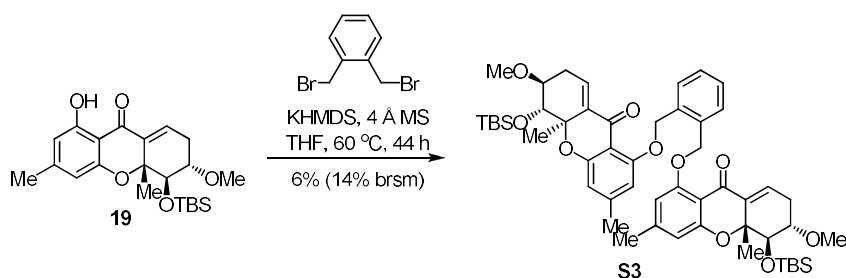

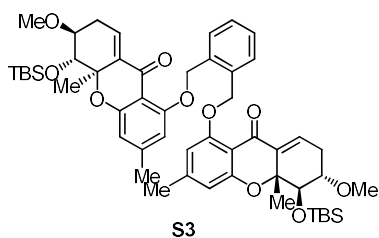

**Tetrahydroxanthone S3.** To a 10 mL Schlenk tube was added newly activated 4 Å MS (50 mg) under N<sub>2</sub> atmosphere, then **19** (15.8 mg, 0.04 mmol, 1 equiv) in anhydrous THF (1 mL) was added. After the solution stirred at 17 °C for 20 min, KHMDS (1.0 M in

THF, 39 μL, 0.04 mol, 1 equiv) was added dropwise and the solution was stirred at 17 °C for 20 min. 1,3-bis(bromomethyl)benzene (5.16 mg, 0.02 mmol, 0.5 equiv) in anhydrous THF (0.1 mL) was added, then the solution was heated to 60 °C and remained at 60 °C for 44 h. It was cooled to 17 °C then quenched by saturated aqueous NH<sub>4</sub>Cl (2 mL). The mixture was extracted with EtOAc (5 mL×3). The combined organic phase was washed with brine (15 mL). The organic phase was dried over Na<sub>2</sub>SO<sub>4</sub>, filtered, concentrated, and purified by PTLC to give **19** (9.0 mg) and **S3** (1.1 mg, 6%, 14% brsm) as a light yellow solid. *R*<sub>f</sub> = 0.60 (20% Ethyl acetate-petroleum ether); [α]<sub>D</sub><sup>20</sup> = -20.7 (*c* = 0.03, CHCl<sub>3</sub>). <sup>1</sup>H NMR (500 MHz, CDCl<sub>3</sub>) δ 7.70 (dd, *J* = 5.4, 3.5 Hz, 2H), 7.37 (dd, *J* = 5.6, 3.4 Hz, 2H), 6.71 (dd, *J* = 4.9, 2.9 Hz, 2H), 6.47 (s, 2H), 6.26 (s, 2H), 5.42 (d, *J* = 12.3 Hz, 2H), 5.35 (d, *J* = 12.3 Hz, 2H), 4.00 (d, *J* = 10.1 Hz, 2H), 3.42 (s, 6H), 3.28 (td, *J* = 9.4, 6.5 Hz, 2H), 2.87 – 2.79 (m, 2H), 2.28 – 2.18 (m, 8H), 1.34 (s, 6H), 0.99 (s, 18H), 0.22 (s, 6H), 0.16 (s, 6H) ppm. <sup>13</sup>C NMR (125 MHz, CDCl<sub>3</sub>) δ 179.5 (2 C), 161.0 (2 C), 160.1 (2 C), 147.5 (2 C), 137.2 (2 C), 134.6 (2 C), 131.1 (2 C), 128.6 (2 C), 128.2 (2 C), 111.1 (2 C), 108.9 (2 C), 106.7 (2 C), 82.5 (2 C), 77.7 (2 C), 77.6 (2 C), 69.7 (2 C), 58.0 (2 C), 31.6 (2 C), 26.0 (6 C), 22.5 (2 C), 19.6 (2 C), 18.6 (2 C), -4.3 (2 C), -4.6 (2 C) ppm. IR ν<sub>max</sub> 2923, 1615, 1467, 1259, 1096, 1023, 879, 806 cm<sup>-1</sup>; HRMS (ESI): *m/z* calcd for C<sub>52</sub>H<sub>70</sub>O<sub>10</sub>Si<sub>2</sub>Na [M+Na]<sup>+</sup>: 933.4405, found 933.4415.

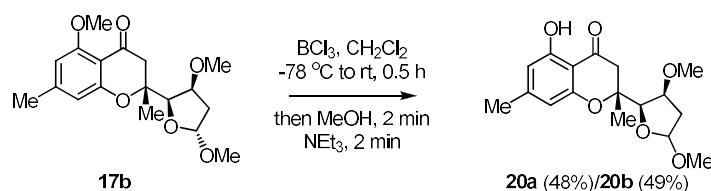

**Acetal 20a/20b.** To a solution of **17b** (98.8 mg, 0.29 mmol, 1 equiv) in anhydrous CH<sub>2</sub>Cl<sub>2</sub> (3 mL) was added BCl<sub>3</sub> (1.0 M in hexane, 0.59 mL, 0.59 mmol, 2 equiv) dropwise at -78 °C. After addition, the cooled bath was removed and the solution was warmed to 26 °C. After TLC shows all **17b** was

consumed, MeOH (0.5 mL) was added dropwise and stirred at 26 °C for 2 min. Then NEt<sub>3</sub> (1.0 mL) was added. After the solution stirred at 26 °C for more 2 min, it was quenched by saturated aqueous NaHCO<sub>3</sub> (2 mL) and stirred at 26 °C for 5 min. The mixture was extracted with EtOAc (10 mL×3). The combined organic phase was washed with brine (15 mL). The organic phase was dried over Na<sub>2</sub>SO<sub>4</sub>, filtered, concentrated, and purified by silica gel column chromatography (10% to 15% Ethyl acetate-petroleum ether) to give **20a** (45.1 mg, 48%) as a white solid and **20b** (46.5 mg, 49%) as a white solid (relative stereochemistry remains uncertain).

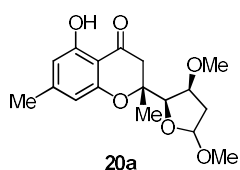

**Acetal 20a.**  $R_f = 0.60$  (20% Ethyl acetate-petroleum ether);  $[\alpha]_D^{21} = -49.6$  ( $c = 0.33$ , CHCl<sub>3</sub>). <sup>1</sup>H NMR (400 MHz, CDCl<sub>3</sub>)  $\delta$  11.71 (s, 1H), 6.27 (s, 1H), 6.25 (s, 1H), 5.16 (dd,  $J = 5.4, 3.1$  Hz, 1H), 4.04 (d,  $J = 4.0$  Hz, 1H), 3.92 – 3.82 (m, 1H), 3.35 (s, 3H), 3.20 – 3.04 (m, 4H), 2.71 (d,  $J = 17.3$  Hz, 1H), 2.30 – 2.18 (m, 4H), 1.95 (ddd,  $J = 14.2, 5.5, 3.2$  Hz, 1H), 1.54 (s, 3H) ppm. <sup>13</sup>C NMR (100 MHz, CDCl<sub>3</sub>)  $\delta$  196.9, 161.4, 159.1, 150.1, 109.3, 108.5, 105.4, 103.9, 82.5, 81.3, 80.3, 56.1, 55.4, 43.0, 38.5, 23.0, 22.4 ppm. IR  $\nu_{\max}$  2930, 1640, 1570, 1448, 1368, 1203, 1037, 752 cm<sup>-1</sup>; HRMS (EI):  $m/z$  calcd for C<sub>17</sub>H<sub>22</sub>O<sub>6</sub> [M]<sup>+</sup>: 322.1416, found 322.1418.

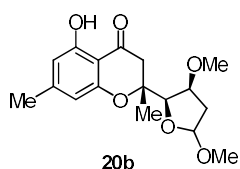

**Acetal 20b.**  $R_f = 0.52$  (30% Ethyl acetate-petroleum ether);  $[\alpha]_D^{21} = +109.1$  ( $c = 0.51$ , CHCl<sub>3</sub>). <sup>1</sup>H NMR (400 MHz, CDCl<sub>3</sub>)  $\delta$  11.66 (s, 1H), 6.30 (s, 1H), 6.29 (s, 1H), 5.12 (d,  $J = 5.7$  Hz, 1H), 4.18 (d,  $J = 4.6$  Hz, 1H), 3.86 (t,  $J = 4.8$  Hz, 1H), 3.43 (s, 3H), 3.26 (s, 3H), 3.09 (d,  $J = 17.2$  Hz, 1H), 2.80 (d,  $J = 17.1$  Hz, 1H), 2.25 (s, 3H), 2.23 (d,  $J = 14.4$  Hz, 1H), 2.01 (dt,  $J = 14.4, 5.6$  Hz, 1H), 1.57 (s, 3H) ppm. <sup>13</sup>C NMR (100 MHz, CDCl<sub>3</sub>)  $\delta$  197.1, 161.5, 159.0, 150.5, 109.3, 108.7, 105.6, 105.2, 86.0, 82.6, 79.6, 57.1, 55.9, 43.0, 36.9, 22.5, 21.3 ppm. IR  $\nu_{\max}$  2931, 1640, 1570, 1448, 1370, 1307, 1203, 1089, 1036, 935, 831, 750 cm<sup>-1</sup>; HRMS (EI):  $m/z$  calcd for C<sub>17</sub>H<sub>22</sub>O<sub>6</sub> [M]<sup>+</sup>: 322.1416, found 322.1415.



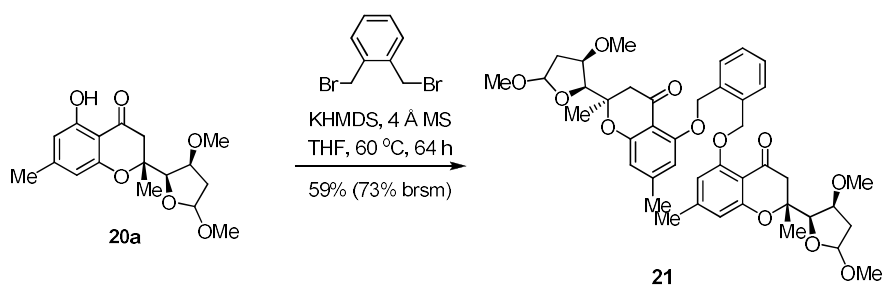

**Acetal 21.** To a 10 mL Schlenk tube was added newly activated 4 Å MS (100 mg) under N<sub>2</sub> atmosphere, then **20a** (45.1 mg, 0.14 mmol, 1 equiv) in anhydrous THF (2 mL) was added. After the solution stirred at 26 °C for 20 min, KHMDS (1.0 M in THF, 0.14 mL, 0.14 mol, 1 equiv) was added. The solution was stirred at 26

°C for 20 min, and 1,3-bis(bromomethyl)benzene (18.5 mg, 0.07 mmol, 0.5 equiv) in anhydrous THF (0.5 mL) was added, then the solution was heated to 60 °C and remained for 64 h. It was cooled to 26 °C and quenched by saturated aqueous NH<sub>4</sub>Cl (2 mL). The mixture was extracted with EtOAc (5 mL×3). The combined organic phase was washed with brine (15 mL). The organic phase was dried over Na<sub>2</sub>SO<sub>4</sub>, filtered, concentrated, and purified by silica gel column chromatography (5% to 40% Ethyl acetate-petroleum ether) to give **20a** (8.5 mg) and **21** (30.8 mg, 59%, 73% brsm) as a light yellow solid. *R*<sub>f</sub> = 0.32 (40% Ethyl acetate-petroleum ether); [α]<sub>D</sub><sup>20</sup> = -123 (*c* = 0.09, CHCl<sub>3</sub>). <sup>1</sup>H NMR (400 MHz, CDCl<sub>3</sub>) δ 7.73 (dd, *J* = 5.4, 3.5 Hz, 2H), 7.38 (dd, *J* = 5.6, 3.4 Hz, 2H), 6.44 (s, 2H), 6.39 (s, 2H), 5.42 (d, *J* = 12.4 Hz, 2H), 5.27 (d, *J* = 12.4 Hz, 2H), 5.19 (dd, *J* = 5.6, 3.0 Hz, 2H), 4.13 (d, *J* = 4.3 Hz, 2H), 3.94 (dd, *J* = 7.1, 3.0 Hz, 2H), 3.35 (s, 6H), 3.21 (s, 6H), 2.93 (d, *J* = 15.9 Hz, 2H), 2.68 (d, *J* = 15.8 Hz, 2H), 2.31 – 2.16 (m, 8H), 1.96 (ddd, *J* = 14.2, 5.8, 3.0 Hz, 2H), 1.48 (s, 6H) ppm. <sup>13</sup>C NMR (100 MHz, CDCl<sub>3</sub>) δ 190.1 (2 C), 160.7 (2 C), 158.7 (2 C), 147.4 (2 C), 134.5 (2 C), 128.4 (2 C), 128.1 (2 C), 111.0 (2 C), 108.7 (2 C), 105.9 (2 C), 104.0 (2 C), 82.0 (2 C), 81.7 (2 C), 80.3 (2 C), 69.4 (2 C), 56.6 (2 C), 55.3 (2 C), 45.9 (2 C), 38.5 (2 C), 22.3 (2 C), 20.8 (2 C) ppm. IR ν<sub>max</sub> 2921, 1678, 1612, 1565, 1449, 1353, 1230, 1101, 1040, 962, 754 cm<sup>-1</sup>; HRMS (ESI): *m/z* calcd for C<sub>42</sub>H<sub>50</sub>O<sub>12</sub>Na [M+Na]<sup>+</sup>: 769.3200, found 769.3196.

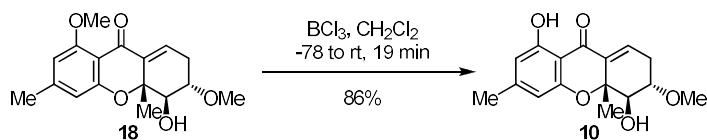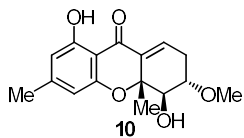

**Tetrahydroxanthone 10.** To a solution of **18** (98.6 mg, 0.32 mmol, 1 equiv) in anhydrous  $\text{CH}_2\text{Cl}_2$  (6.5 mL) cooled to  $-78\text{ }^\circ\text{C}$  was added  $\text{BCl}_3$  (1.0 M in hexane, 0.49 mL, 0.49 mmol, 1.5 equiv) dropwise. After addition, the cooled bath was

removed and the solution was warmed to  $17\text{ }^\circ\text{C}$ . After TLC shows all **18** was consumed, it was quenched by saturated aqueous  $\text{NaHCO}_3$  (3 mL) and the solution was stirred at  $17\text{ }^\circ\text{C}$  for 5 min. Then the mixture was extracted with EtOAc (10 mL $\times$ 3). The combined organic phase was washed with brine (15 mL). The organic phase was dried over  $\text{Na}_2\text{SO}_4$ , filtered, concentrated, and purified by silica gel column chromatography (15% to 25% Ethyl acetate-petroleum ether) to give **10** (81.2 mg, 86%) as a yellow solid.  $R_f = 0.41$  (40% Ethyl acetate-petroleum ether);  $[\alpha]_D^{23} = -17.5$  ( $c = 0.32$ ,  $\text{CHCl}_3$ ).  $^1\text{H}$  NMR (500 MHz,  $\text{CDCl}_3$ )  $\delta$  12.06 (s, 1H), 6.86 (dd,  $J = 5.0, 2.9$  Hz, 1H), 6.34 (s, 1H), 6.32 (s, 1H), 4.11 (d,  $J = 10.3$  Hz, 1H), 3.50 (s, 3H), 3.44 (td,  $J = 9.6, 6.4$  Hz, 1H), 3.00 – 2.90 (m, 2H), 2.36 – 2.24 (m, 4H), 1.50 (s, 3H) ppm.  $^{13}\text{C}$  NMR (125 MHz,  $\text{CDCl}_3$ )  $\delta$  185.1, 162.9, 158.8, 150.9, 135.5, 133.2, 110.2, 109.1, 105.2, 82.2, 76.8 (CH, dept 135), 75.8, 57.2, 30.8, 22.6, 19.7 ppm. IR  $\nu_{\text{max}}$  3554, 2920, 1633, 1604, 1426, 1364, 1200, 1071, 796  $\text{cm}^{-1}$ ; HRMS (EI):  $m/z$  calcd for  $\text{C}_{16}\text{H}_{18}\text{O}_5$   $[\text{M}]^+$ : 290.1154, found 290.1158.

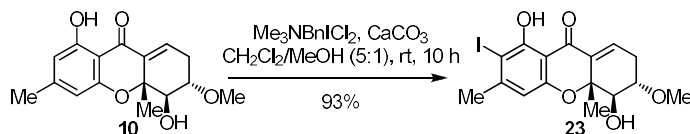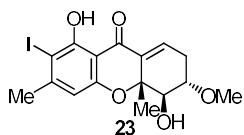

**Tetrahydroxanthone 23.** To a solution of **10** (81.2 mg, 0.28 mmol, 1 equiv) in  $\text{CH}_2\text{Cl}_2/\text{MeOH}$  (5:1, 2.8 mL) was added  $\text{CaCO}_3$  (205.5 mg, 2 mmol, 7 equiv) and  $\text{Me}_3\text{NBnICl}_2$  (97.7 mg, 2.8 mmol, 1 equiv) successively, and the solution

was stirred at  $14\text{ }^\circ\text{C}$  for 10 h. It was filtered through Celite, concentrated, and purified by silica gel column chromatography (10% to 25% Ethyl acetate-petroleum ether) to give **23** as a yellow solid (109.1 mg, 93%).  $R_f = 0.41$  (40% Ethyl acetate-petroleum ether);  $[\alpha]_D^{21} = -62.5$  ( $c = 0.19$ ,  $\text{CHCl}_3$ ).  $^1\text{H}$

NMR (400 MHz, CDCl<sub>3</sub>)  $\delta$  13.12 (s, 1H), 6.91 (dd,  $J$  = 5.0, 2.9 Hz, 1H), 6.55 (s, 1H), 4.12 (d,  $J$  = 10.3 Hz, 1H), 3.50 (s, 3H), 3.44 (td,  $J$  = 9.6, 6.3 Hz, 1H), 2.96 (td,  $J$  = 11.7, 5.8 Hz, 1H), 2.95 (s, OH, 1 H), 2.44 (s, 3H), 2.33 (ddd,  $J$  = 19.9, 9.1, 2.9 Hz, 1H), 1.50 (s, 3H) ppm. <sup>13</sup>C NMR (125 MHz, CDCl<sub>3</sub>)  $\delta$  184.6, 161.5, 158.8, 153.3, 134.7, 134.5, 110.4, 105.1, 82.6, 81.1, 76.7, 75.6, 57.3, 30.8, 29.6, 19.7 ppm. IR  $\nu_{\text{max}}$  3454, 2923, 1582, 1445, 1373, 1265, 1189, 1072, 844 cm<sup>-1</sup>; HRMS (EI):  $m/z$  calcd for C<sub>16</sub>H<sub>17</sub>IO<sub>5</sub> [M]<sup>+</sup>: 416.0121, found 416.0117.

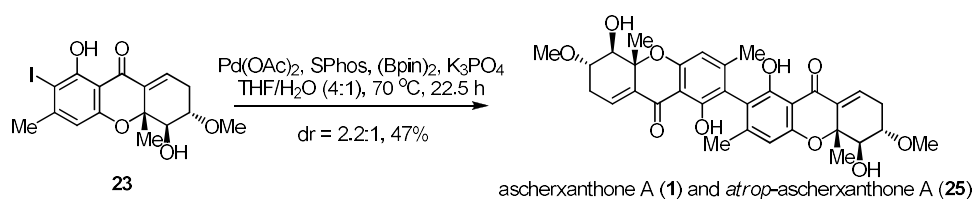

To a dried 10 mL Schlenk tube was added **23** (109.1 mg, 0.26 mmol, 1 equiv), Pd(OAc)<sub>2</sub> (11.6 mg, 0.05 mmol, 0.2 equiv), (Bpin)<sub>2</sub> (46.8 mg, 0.18 mmol, 0.7 equiv), K<sub>3</sub>PO<sub>4</sub> (170.5 mg, 0.8 mmol, 3 equiv), then it was pumped and replaced with N<sub>2</sub> atmosphere for three times, 2-dicyclohexylphosphino-2',6'-dimethoxy-1,1'-biphenyl (SPhos) (43.0 mg, 0.1 mmol, 0.4 equiv) was added under N<sub>2</sub> atmosphere. After THF/H<sub>2</sub>O (4:1, 3 mL) was added, the solution was subjected to three freeze-pump-thaw cycles using liquid nitrogen to degas the solution, then the mixture was heated to 70 °C and remained for 22.5 h. The solution was cooled to 15 °C, it was quenched by saturated aqueous NH<sub>4</sub>Cl (2 mL). The mixture was extracted with EtOAc (10 mL×3). The combined organic phase was washed with brine (15 mL). The organic phase was dried over Na<sub>2</sub>SO<sub>4</sub>, filtered, concentrated, and purified by silica gel column chromatography (25% to 50% Ethyl acetate-petroleum ether) to give **10** (33.4 mg, 44%) and dimeric products (35.5 mg, 47%) which were further purified by preparative HPLC (SFC, Column: Daicel CHIRALCEL OD-H, 5  $\mu$ m, 30 mm×250 mm, MeOH + 0.3% FA + CO<sub>2</sub>, flow rate: 65 g/min). Ascherxanthone A (**1**) was obtained as a yellow single crystal from the CH<sub>2</sub>Cl<sub>2</sub>/hexane solution. *Atrop*-ascherxanthone A (**25**) was obtained as a yellow single crystal from the CDCl<sub>3</sub>/hexane solution.

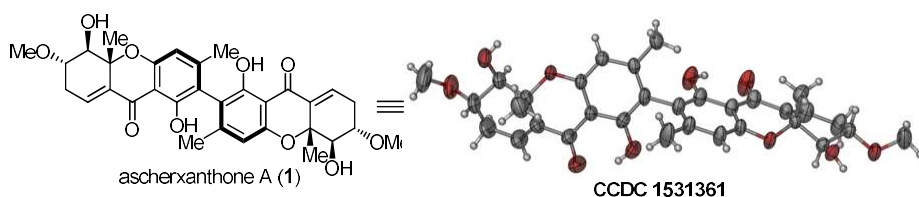

### Ascherxanthone A (1).

$R_f = 0.16$  (50% Ethyl acetate -petroleum ether);

$[\alpha]_D^{18} = +137.1$  ( $c = 0.645$ ,

$\text{CHCl}_3$ ) [Previous report in lit.  $[\alpha]_D^{24} = +227$  ( $c = 0.2$ ,  $\text{CHCl}_3$ ), value measured in 2007 by the same group  $[\alpha]_D^{27} = +88.3$  ( $c = 0.2$ ,  $\text{CHCl}_3$ ), sample from Prof. Isaka (8:1 mixture of ascherxanthone A and *atrop*-ascherxanthone A)  $[\alpha]_D^{18} = +86.1$  ( $c = 0.1$ ,  $\text{CHCl}_3$ )].  $^1\text{H}$  NMR (500 MHz,  $\text{CDCl}_3$ )  $\delta$  12.35 (s, 2H), 6.87 (dd,  $J = 5.0, 2.9$  Hz, 2H), 6.51 (s, 2H), 4.14 (d,  $J = 10.2$  Hz, 2H), 3.52 (s, 6H), 3.48 (ddd,  $J = 10.2, 9.1, 6.4$  Hz, 2H), 3.01 (br, OH, 2H), 2.96 (ddd,  $J = 19.7, 6.4, 5.0$  Hz, 2H), 2.34 (ddd,  $J = 19.7, 9.1, 2.9$  Hz, 2H), 2.09 (s, 6H), 1.58 (s, 6H) ppm.  $^{13}\text{C}$  NMR (125 MHz,  $\text{CDCl}_3$ )  $\delta$  185.3 (2 C), 160.5 (2 C), 158.2 (2 C), 150.8 (2 C), 135.6 (2 C), 133.3 (2 C), 115.9 (2 C), 109.5 (2 C), 105.2 (2 C), 82.2 (2 C), 76.8 (CH, dept 135, 2 C), 75.9 (2 C), 57.3 (2 C), 30.8 (2 C), 21.0 (2 C), 20.0 (2 C) ppm. IR  $\nu_{\text{max}}$  3454, 2920, 1597, 1371, 1263, 1174, 1087, 801  $\text{cm}^{-1}$ ; HRMS (EI):  $m/z$  calcd for  $\text{C}_{32}\text{H}_{34}\text{O}_{10}$   $[\text{M}]^+$ : 578.2152, found 578.2154.

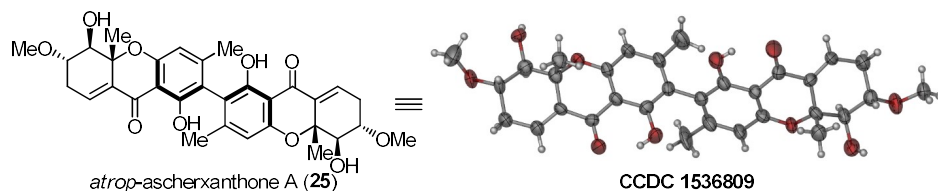

### *Atrop*-ascherxanthone

**A (25).**  $R_f = 0.16$  (50%

Ethyl acetate

-petroleum ether);  $[\alpha]_D^{19}$

$= -251.7$  ( $c = 0.265$ ,  $\text{CHCl}_3$ ) [value measured in 2007 by Prof. Isaka (1.4:1 mixture of ascherxanthone A and *atrop*-ascherxanthone A)  $[\alpha]_D^{27} = -56.6$  ( $c = 0.2$ ,  $\text{CHCl}_3$ )].  $^1\text{H}$  NMR (500 MHz,  $\text{CDCl}_3$ )  $\delta$  12.46 (s, 2H), 6.89 (dd,  $J = 5.0, 2.9$  Hz, 2H), 6.52 (s, 2H), 4.15 (d,  $J = 10.2$  Hz, 2H), 3.53 (s, 6H), 3.48 (ddd,  $J = 10.2, 9.1, 6.4$  Hz, 2H), 2.97 (br, OH, 2H), 3.02 – 2.92 (m, 2H), 2.34 (ddd,  $J = 19.7, 9.1, 2.9$  Hz, 2H), 2.02 (s, 6H), 1.59 (s, 6H) ppm.  $^{13}\text{C}$  NMR (125 MHz,  $\text{CDCl}_3$ )  $\delta$  185.3 (2 C), 160.4 (2 C), 158.3 (2 C), 150.9 (2 C), 135.6 (2 C), 133.4 (2 C), 115.9 (2 C), 109.7 (2 C), 105.3 (2 C), 82.4 (2 C), 76.8 (CH, dept 135, 2C), 75.9 (2 C), 57.3 (2 C), 30.9 (2 C), 21.0 (2 C), 20.0 (2 C) ppm. IR  $\nu_{\text{max}}$  3578, 2913, 1617, 1406, 1262, 1175, 1087, 827  $\text{cm}^{-1}$ ; HRMS (EI):  $m/z$  calcd for  $\text{C}_{32}\text{H}_{34}\text{O}_{10}$   $[\text{M}]^+$ : 578.2152, found 578.2157.

**Reference:**

- [1] P. S. Wang, P. Liu, Y. J. Zhai, H. C. Lin, Z. Y. Han, L. Z. Gong, *J. Am. Chem. Soc.* **2015**, *137*, 12732-12735.

Note: During our synthesis, we found the  $^1\text{H}$  and  $^{13}\text{C}$  NMR spectroscopic data of our synthetic ascherxanthone A have slight differences with the previously reported data by Prof. Isaka. So we contacted with Prof. Isaka. We really appreciate that Prof. Isaka generously response us and also sent us the natural samples. We rechecked their NMR spectrum and optical rotations which matched with our synthetic sample. We also found that the spectral and physical data of the minor coupling isomer, *atrop*-ascherxanthone A (**25**), matched with the minor component of the natural sample. The structure of *atrop*-ascherxanthone A was also confirmed by X-ray diffraction analysis. Based on these results, we concluded that *atrop*-ascherxanthone A also exists in the same natural source as ascherxanthone A.

**The following tables itemize the data analysis of the previously reported data, sample from Prof. Isaka and our synthetic ascherxanthone A and *atrop*-ascherxanthone A.**

## Comparison of NMR spectroscopic data of natural and synthetic ascherxanthone A:

**Table 1.** Comparison of  $^1\text{H}$  NMR spectroscopic data of natural and synthetic ascherxanthone A.

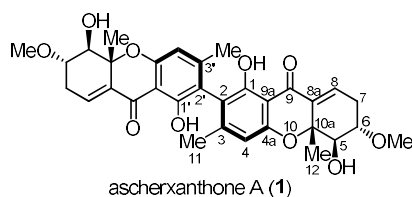

| position                                         | previously reported<br>$^1\text{H}$ NMR<br>$\delta$ $^1\text{H}$ [ppm; mult; $J$<br>(Hz)] 500 MHz,<br>$\text{CDCl}_3$ | sample from Prof.<br>Isaka<br>$\delta$ $^1\text{H}$ [ppm; mult; $J$<br>(Hz)] 500 MHz,<br>$\text{CDCl}_3$ | Synthetic sample<br>$\delta$ $^1\text{H}$ [ppm; mult; $J$<br>(Hz)] 500 MHz,<br>$\text{CDCl}_3$ | deviation<br>(natural–synthetic)<br>$\Delta\delta$ (ppm) |
|--------------------------------------------------|-----------------------------------------------------------------------------------------------------------------------|----------------------------------------------------------------------------------------------------------|------------------------------------------------------------------------------------------------|----------------------------------------------------------|
| 1-OH and<br>1'-OH                                | 12.36 (2H, s, <sup>a</sup> )                                                                                          | 12.35 (s, 2H)                                                                                            | 12.35 (s, 2H)                                                                                  |                                                          |
| H-8 and<br>H-8'                                  | 6.87 (2H, dd, $J$ =<br>5.0, 2.8 Hz)                                                                                   | 6.87 (dd, $J$ = 5.0,<br>2.9 Hz, 2H)                                                                      | 6.87 (dd, $J$ = 5.0,<br>2.9 Hz, 2H)                                                            |                                                          |
| H-4 and<br>H-4'                                  | 6.51 (2H, s) <sup>a</sup>                                                                                             | 6.51 (s, 2H)                                                                                             | 6.51 (s, 2H)                                                                                   |                                                          |
| H-5 and<br>H-5'                                  | 4.13 (2H, d, $J$ = 10.3<br>Hz)                                                                                        | 4.14 (d, $J$ = 10.3<br>Hz, 2H)                                                                           | 4.14 (d, $J$ = 10.2<br>Hz, 2H)                                                                 |                                                          |
| 6-OCH <sub>3</sub><br>and<br>6'-OCH <sub>3</sub> | 3.52 (6H, s)                                                                                                          | 3.52 (s, 6H)                                                                                             | 3.52 (s, 6H)                                                                                   |                                                          |
| H-6 and<br>H-6'                                  | 3.48 (2H, ddd, $J$ =<br>10.3, 9.2, 6.2 Hz)                                                                            | 3.47 (ddd, $J$ = 10.3,<br>9.1, 6.3 Hz, 2H)                                                               | 3.48 (ddd, $J$ = 10.2,<br>9.1, 6.4 Hz, 2H)                                                     | -0.01                                                    |
| 5-OH and<br>5'-OH                                |                                                                                                                       | 2.97 (br, 2H)                                                                                            | 3.01 (br, 2H)                                                                                  |                                                          |
| H-7a and<br>H-7a'                                | 2.97 (2H, ddd, $J$ =<br>19.4, 6.2, 5.0 Hz)                                                                            | 2.96 (ddd, $J$ = 19.7,<br>6.3, 5.0 Hz, 2H)                                                               | 2.96 (ddd, $J$ = 19.7,<br>6.4, 5.0 Hz, 2H)                                                     |                                                          |
| H-7b and<br>H-7b'                                | 2.33 (2H, ddd, $J$ =<br>19.4, 9.2, 2.8 Hz)                                                                            | 2.34 (ddd, $J$ = 19.7,<br>9.1, 2.9 Hz, 2H)                                                               | 2.34 (ddd, $J$ = 19.7,<br>9.1, 2.9 Hz, 2H)                                                     |                                                          |
| H-11 and<br>H-11'                                | 2.10 (6H, s)                                                                                                          | 2.09 (s, 6H)                                                                                             | 2.09 (s, 6H)                                                                                   |                                                          |
| H-12 and<br>H-12'                                | 1.59 (6H, s)                                                                                                          | 1.58 (s, 6H)                                                                                             | 1.58 (s, 6H)                                                                                   |                                                          |

**Table 2.** Comparison of  $^{13}\text{C}$  NMR spectroscopic data of natural and synthetic ascherxanthone A.

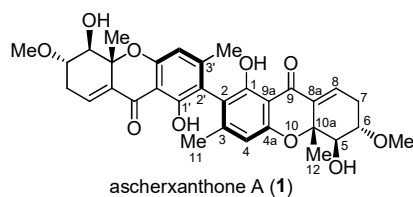

| position                                      | previously reported<br>$^{13}\text{C}$ NMR<br>$\delta$ $^{13}\text{C}$ [ppm]<br>125 MHz, $\text{CDCl}_3$ | sample from<br>Prof. Isaka<br>$\delta$ $^{13}\text{C}$ [ppm]<br>125 MHz, $\text{CDCl}_3$ | Synthetic sample<br>$\delta$ $^{13}\text{C}$ [ppm]<br>125 MHz, $\text{CDCl}_3$ | deviation<br>(natural–synthetic) $\Delta\delta$ (ppm) |
|-----------------------------------------------|----------------------------------------------------------------------------------------------------------|------------------------------------------------------------------------------------------|--------------------------------------------------------------------------------|-------------------------------------------------------|
| C-9 and C-9'                                  | 185.3                                                                                                    | 185.3                                                                                    | 185.3                                                                          |                                                       |
| C-1 and C-1'                                  | 160.5                                                                                                    | 160.5                                                                                    | 160.5                                                                          |                                                       |
| C-4a and C-4a'                                | 158.3                                                                                                    | 158.2                                                                                    | 158.2                                                                          |                                                       |
| C-3 and C-3'                                  | 150.8                                                                                                    | 150.8                                                                                    | 150.8                                                                          |                                                       |
| C-8a and C-8a'                                | 135.6                                                                                                    | 135.6                                                                                    | 135.6                                                                          |                                                       |
| C-8 and C-8'                                  | 133.3                                                                                                    | 133.24                                                                                   | 133.27                                                                         | -0.03                                                 |
| C-2 and C-2'                                  | 115.9                                                                                                    | 115.9                                                                                    | 115.9                                                                          |                                                       |
| C-4 and C-4'                                  | 109.537 <sup>a</sup>                                                                                     | 109.537                                                                                  | 109.537                                                                        |                                                       |
| C-9a and C-9a'                                | 105.3                                                                                                    | 105.2                                                                                    | 105.2                                                                          |                                                       |
| C-10a and<br>C-10a'                           | 82.3                                                                                                     | 82.2                                                                                     | 82.2                                                                           |                                                       |
| C-6 and C-6'                                  | 76.9                                                                                                     | 76.8 (CH, dept)                                                                          | 76.8 (CH, dept)                                                                |                                                       |
| C-5 and C-5'                                  | 75.9                                                                                                     | 75.9                                                                                     | 75.9                                                                           |                                                       |
| 6-OCH <sub>3</sub> and<br>6'-OCH <sub>3</sub> | 57.3                                                                                                     | 57.3                                                                                     | 57.3                                                                           |                                                       |
| C-7 and C-7'                                  | 30.9                                                                                                     | 30.8                                                                                     | 30.8                                                                           |                                                       |
| C-11 and C-11'                                | 21.0                                                                                                     | 21.0                                                                                     | 21.0                                                                           |                                                       |
| C-12 and C-12'                                | 20.0                                                                                                     | 20.0                                                                                     | 20.0                                                                           |                                                       |



## Comparison of NMR spectroscopic data of natural and synthetic *atrop-ascherxanthone A*:

**Table 3.** Comparison of  $^1\text{H}$  NMR spectroscopic data of natural and synthetic *atrop-ascherxanthone A*.

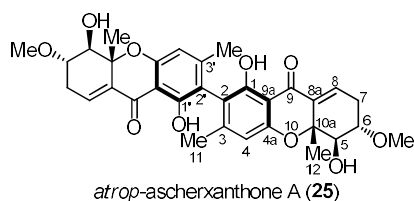

| position                                   | sample from Prof. Isaka<br>$\delta$ $^1\text{H}$ [ppm; mult; $J$ (Hz)]<br>500 MHz, $\text{CDCl}_3$ | Synthetic sample<br>$\delta$ $^1\text{H}$ [ppm; mult; $J$ (Hz)]<br>500 MHz, $\text{CDCl}_3$ | deviation<br>(natural–synthetic)<br>$\Delta\delta$ (ppm) |
|--------------------------------------------|----------------------------------------------------------------------------------------------------|---------------------------------------------------------------------------------------------|----------------------------------------------------------|
| 1-OH and 1'-OH                             | 12.46 (s, 2H)                                                                                      | 12.46 (s, 2H)                                                                               |                                                          |
| H-8 and H-8'                               | 6.89 (dd, $J = 5.0, 2.9$ Hz, 2H)                                                                   | 6.89 (dd, $J = 5.0, 2.9$ Hz, 2H)                                                            |                                                          |
| H-4 and H-4'                               | 6.52 (s, 2H)                                                                                       | 6.52 (s, 2H)                                                                                |                                                          |
| H-5 and H-5'                               | 4.15 (d, $J = 10.2$ Hz, 2H)                                                                        | 4.15 (d, $J = 10.2$ Hz, 2H)                                                                 |                                                          |
| 6-OCH <sub>3</sub> and 6'-OCH <sub>3</sub> | 3.53 (s, 6H)                                                                                       | 3.53 (s, 6H)                                                                                |                                                          |
| H-6 and H-6'                               | 3.50 – 3.43 (m, 2H)                                                                                | 3.48 (ddd, $J = 10.2, 9.1, 6.4$ Hz, 2H)                                                     |                                                          |
| 5-OH and 5'-OH                             | 2.97 (br, 2H)                                                                                      | 2.97 (br, 2H)                                                                               |                                                          |
| H-7a and H-7a'                             | 3.00 – 2.92 (m, 2H)                                                                                | 3.02 – 2.92 (m, 2H)                                                                         |                                                          |
| H-7b and H-7b'                             | 2.34 (ddd, $J = 19.7, 9.1, 2.9$ Hz, 2H)                                                            | 2.34 (ddd, $J = 19.7, 9.1, 2.9$ Hz, 2H)                                                     |                                                          |
| H-11 and H-11'                             | 2.02 (s, 6H)                                                                                       | 2.02 (s, 6H)                                                                                |                                                          |
| H-12 and H-12'                             | 1.59 (s, 6H)                                                                                       | 1.59 (s, 6H)                                                                                |                                                          |

**Table 4.** Comparison of  $^{13}\text{C}$  NMR spectroscopic data of natural and synthetic *atrop*-ascherxanthone

A.

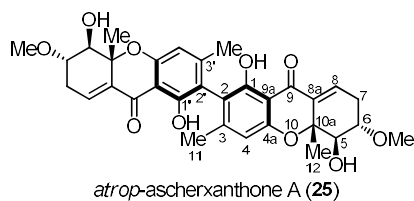

| position                                      | sample from Prof. Isaka<br>$\delta^{13}\text{C}$ [ppm]<br>125 MHz, $\text{CDCl}_3$ | Synthetic sample<br>$\delta^{13}\text{C}$ [ppm]<br>125 MHz, $\text{CDCl}_3$ | deviation<br>(natural–synthetic)<br>$\Delta\delta$ (ppm) |
|-----------------------------------------------|------------------------------------------------------------------------------------|-----------------------------------------------------------------------------|----------------------------------------------------------|
| C-9 and C-9'                                  | 185.3                                                                              | 185.3                                                                       |                                                          |
| C-1 and C-1'                                  | 160.4                                                                              | 160.4                                                                       |                                                          |
| C-4a and C-4a'                                | 158.3                                                                              | 158.3                                                                       |                                                          |
| C-3 and C-3'                                  | 150.9                                                                              | 150.9                                                                       |                                                          |
| C-8a and C-8a'                                | 135.6                                                                              | 135.6                                                                       |                                                          |
| C-8 and C-8'                                  | 133.4                                                                              | 133.4                                                                       |                                                          |
| C-2 and C-2'                                  | 115.9                                                                              | 115.9                                                                       |                                                          |
| C-4 and C-4'                                  | 109.7                                                                              | 109.7                                                                       |                                                          |
| C-9a and C-9a'                                | 105.3                                                                              | 105.3                                                                       |                                                          |
| C-10a and C-10a'                              | 82.4                                                                               | 82.4                                                                        |                                                          |
| C-6 and C-6'                                  | 76.8 (CH, dept)                                                                    | 76.8 (CH, dept)                                                             |                                                          |
| C-5 and C-5'                                  | 75.9                                                                               | 75.9                                                                        |                                                          |
| 6-OCH <sub>3</sub> and<br>6'-OCH <sub>3</sub> | 57.3                                                                               | 57.3                                                                        |                                                          |
| C-7 and C-7'                                  | 30.9                                                                               | 30.9                                                                        |                                                          |
| C-11 and C-11'                                | 21.0                                                                               | 21.0                                                                        |                                                          |
| C-12 and C-12'                                | 20.0                                                                               | 20.0                                                                        |                                                          |

# <sup>1</sup>H and <sup>13</sup>C NMR Spectra of the Synthetic Intermediates and Products:

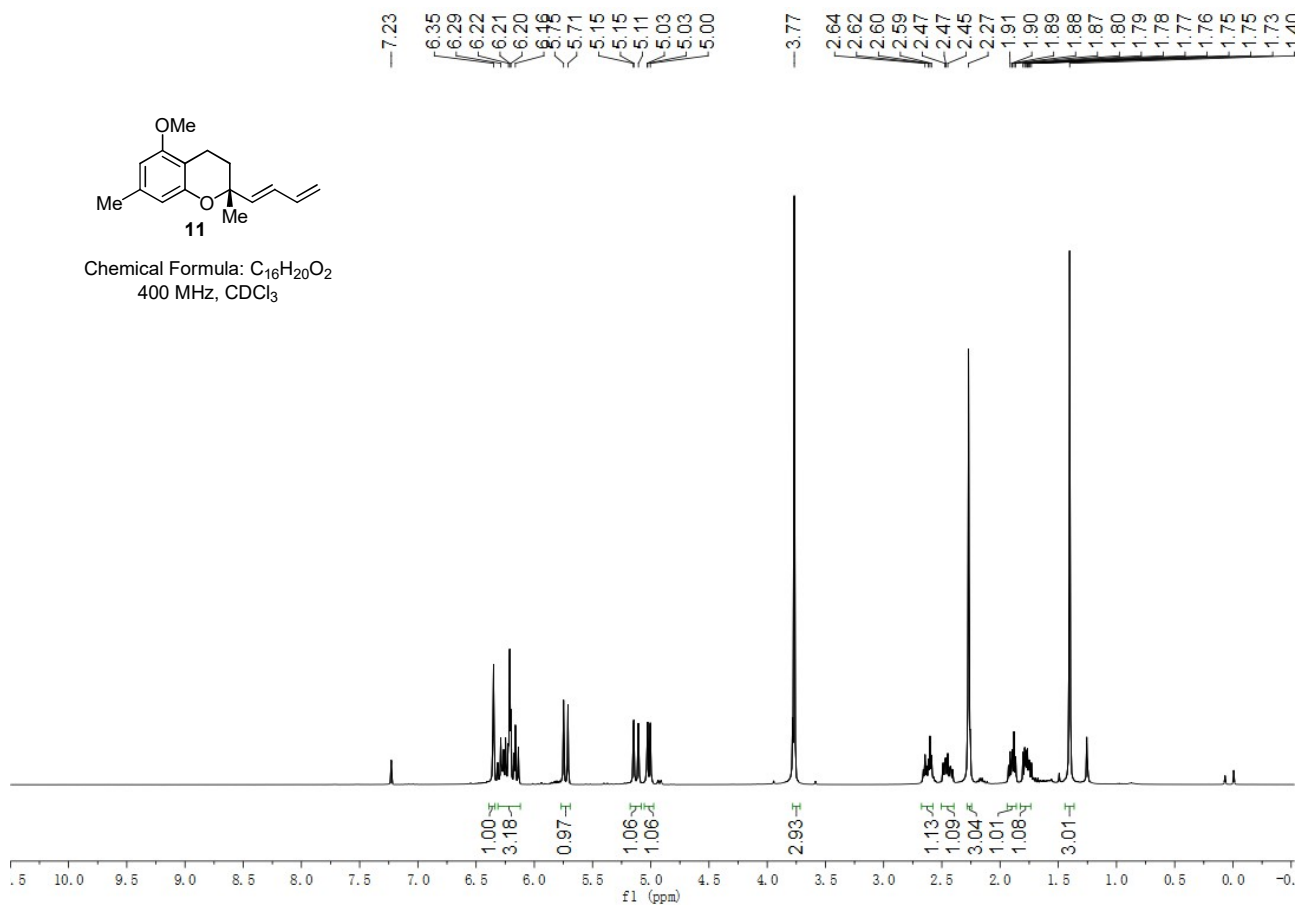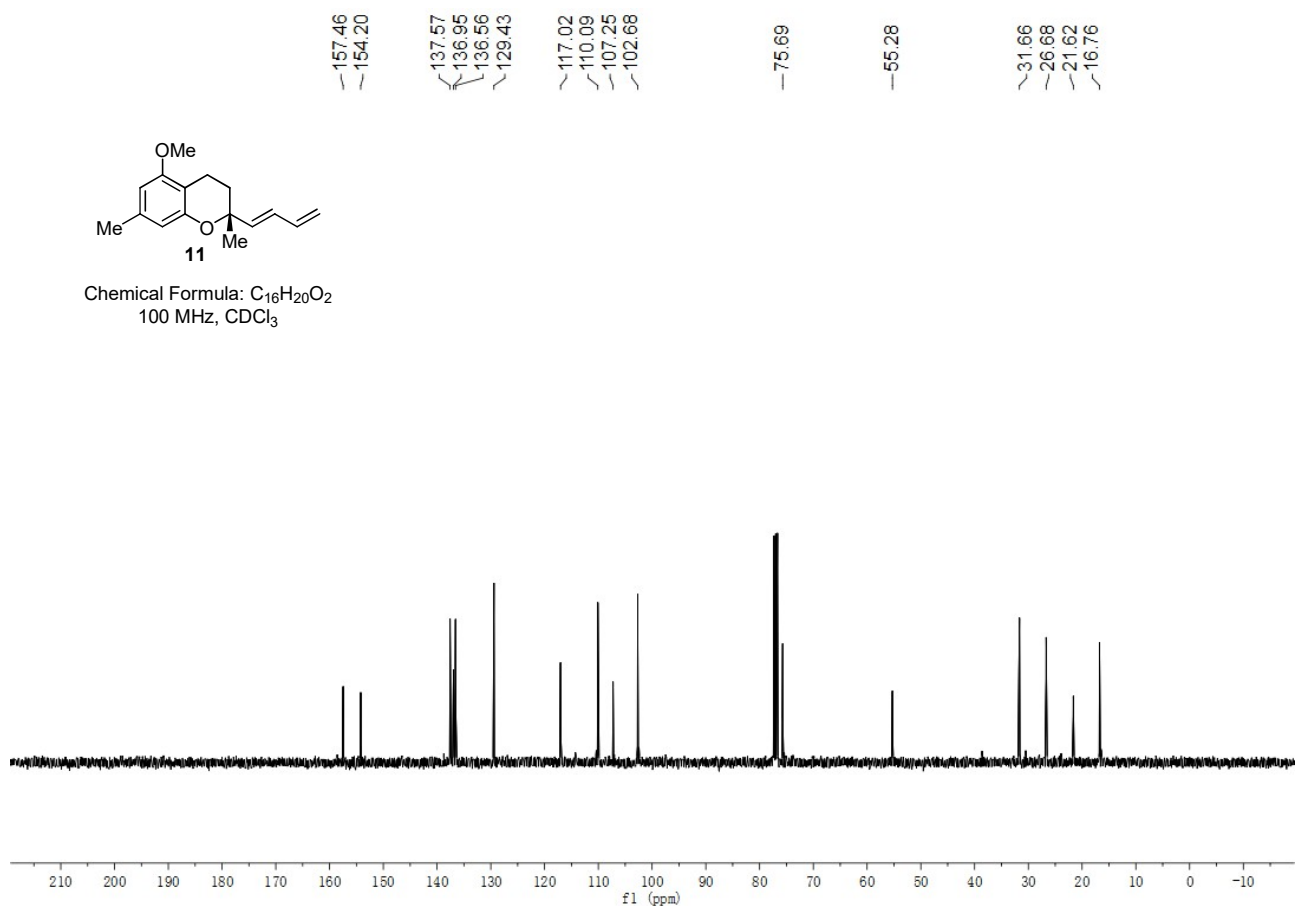

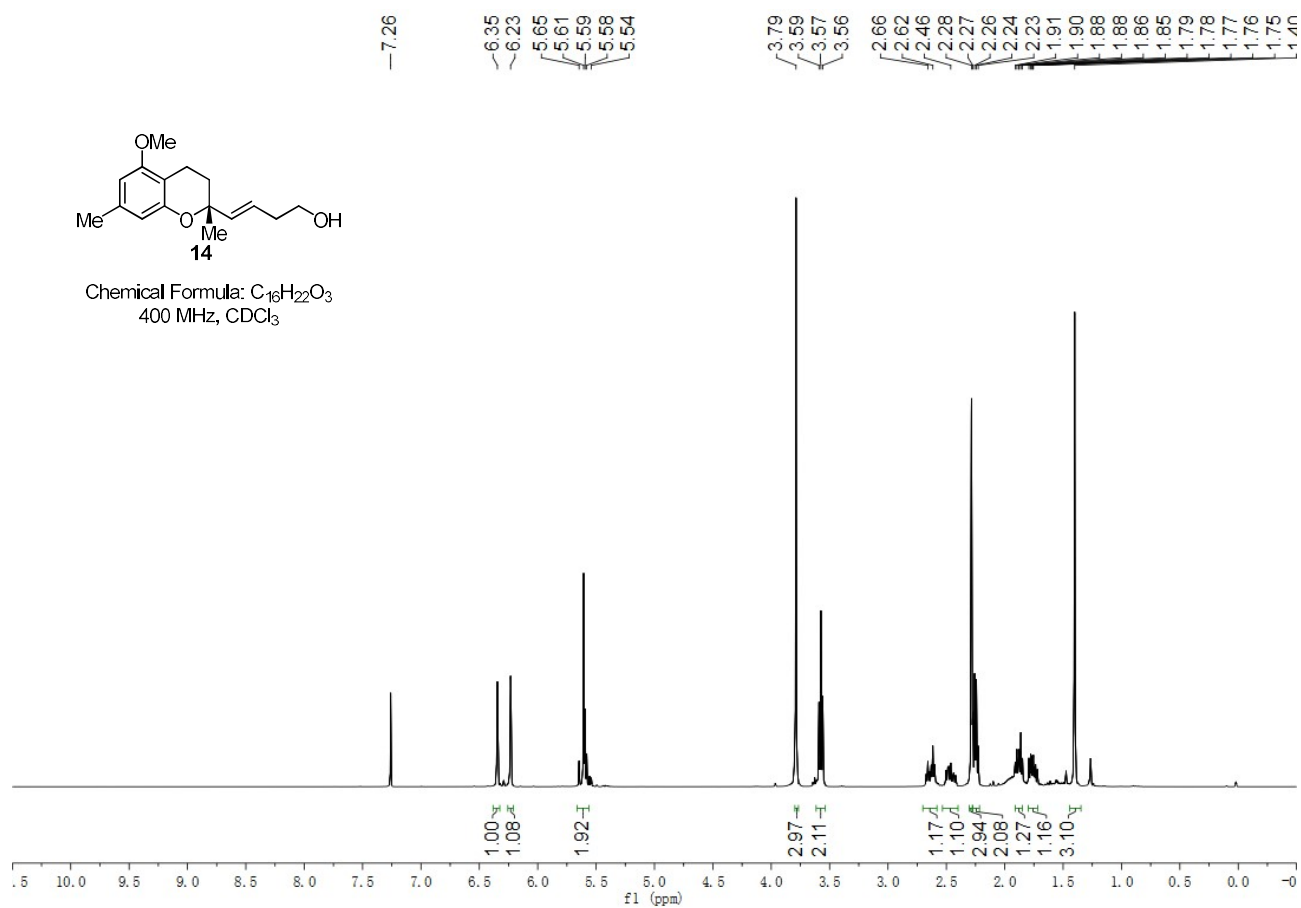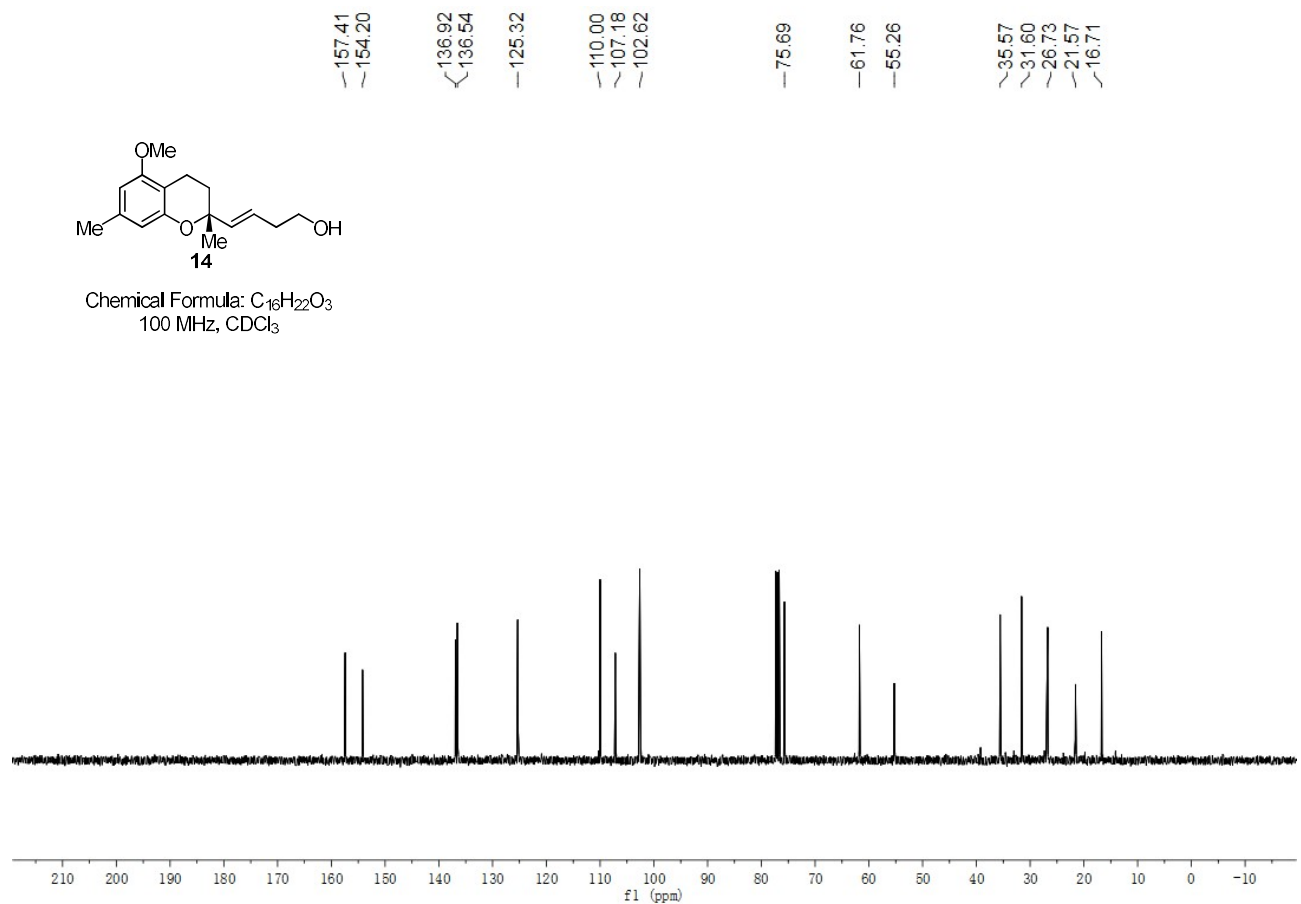

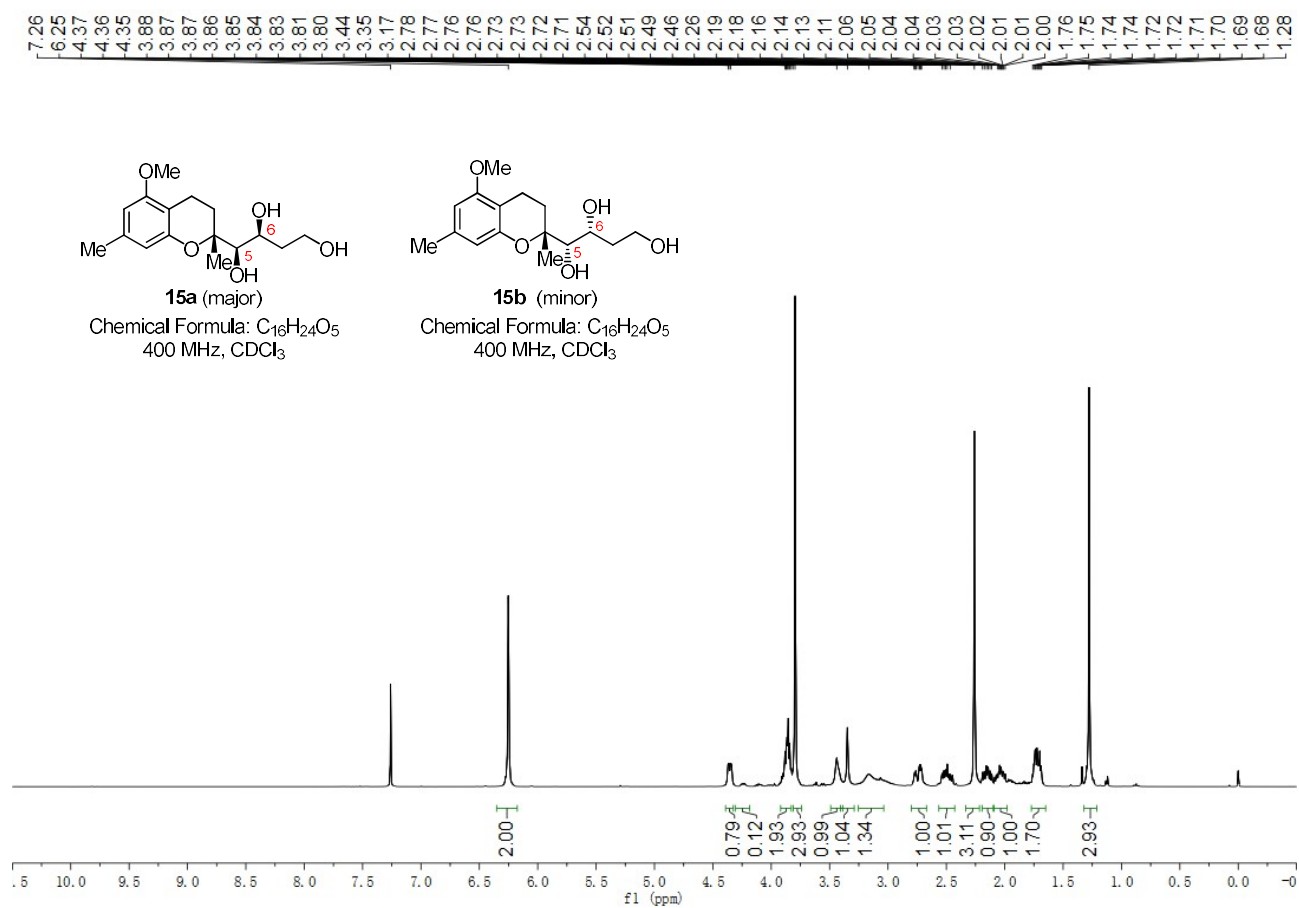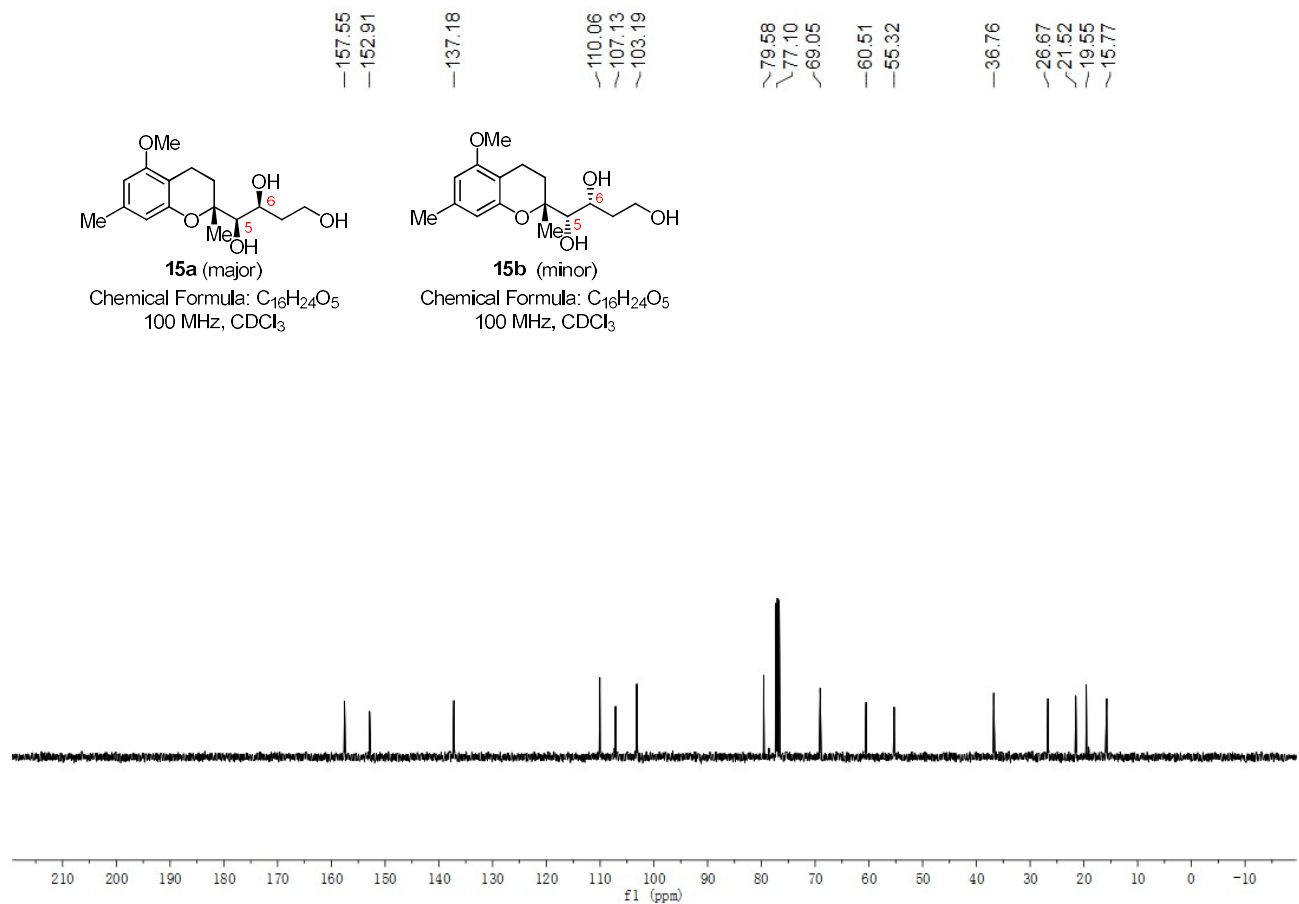

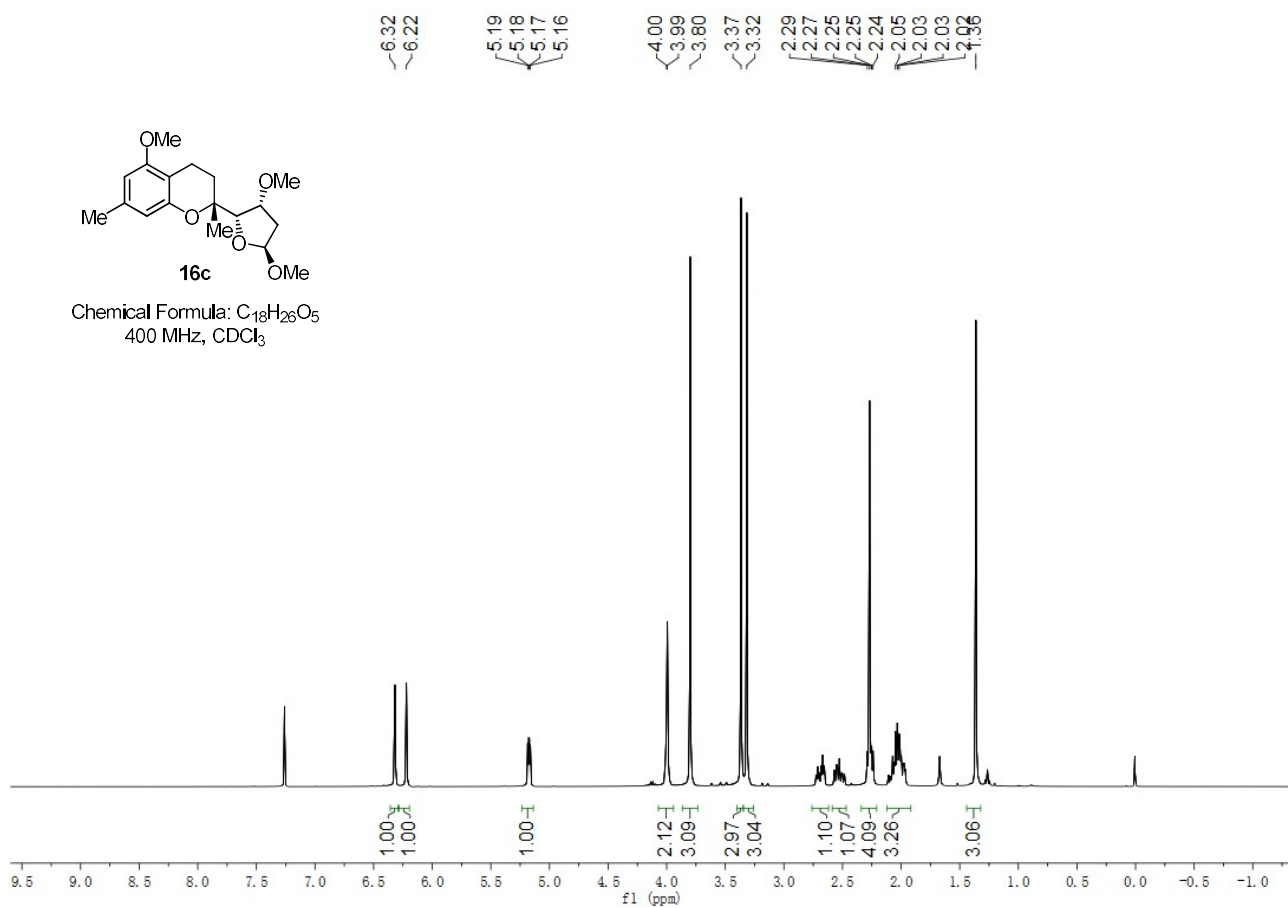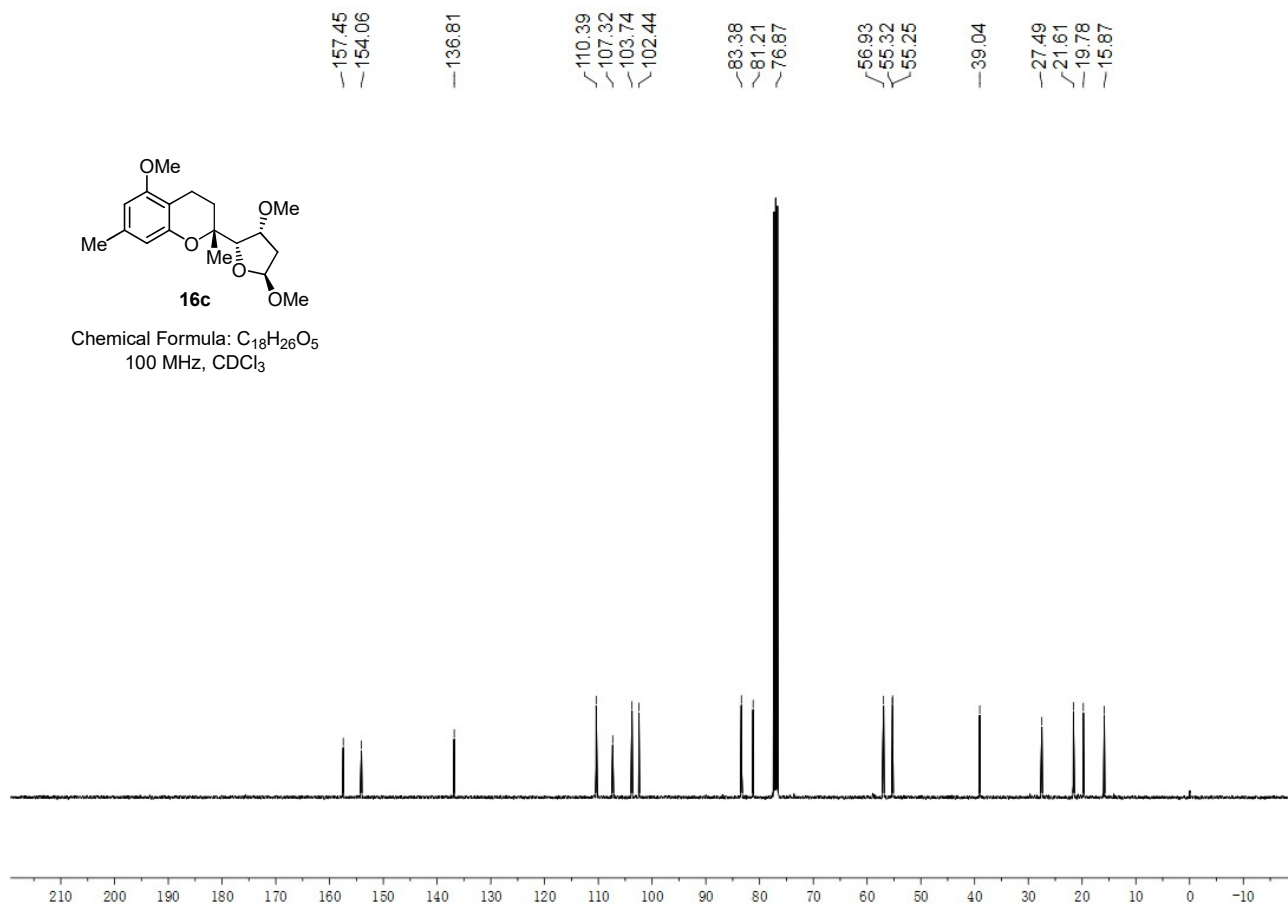

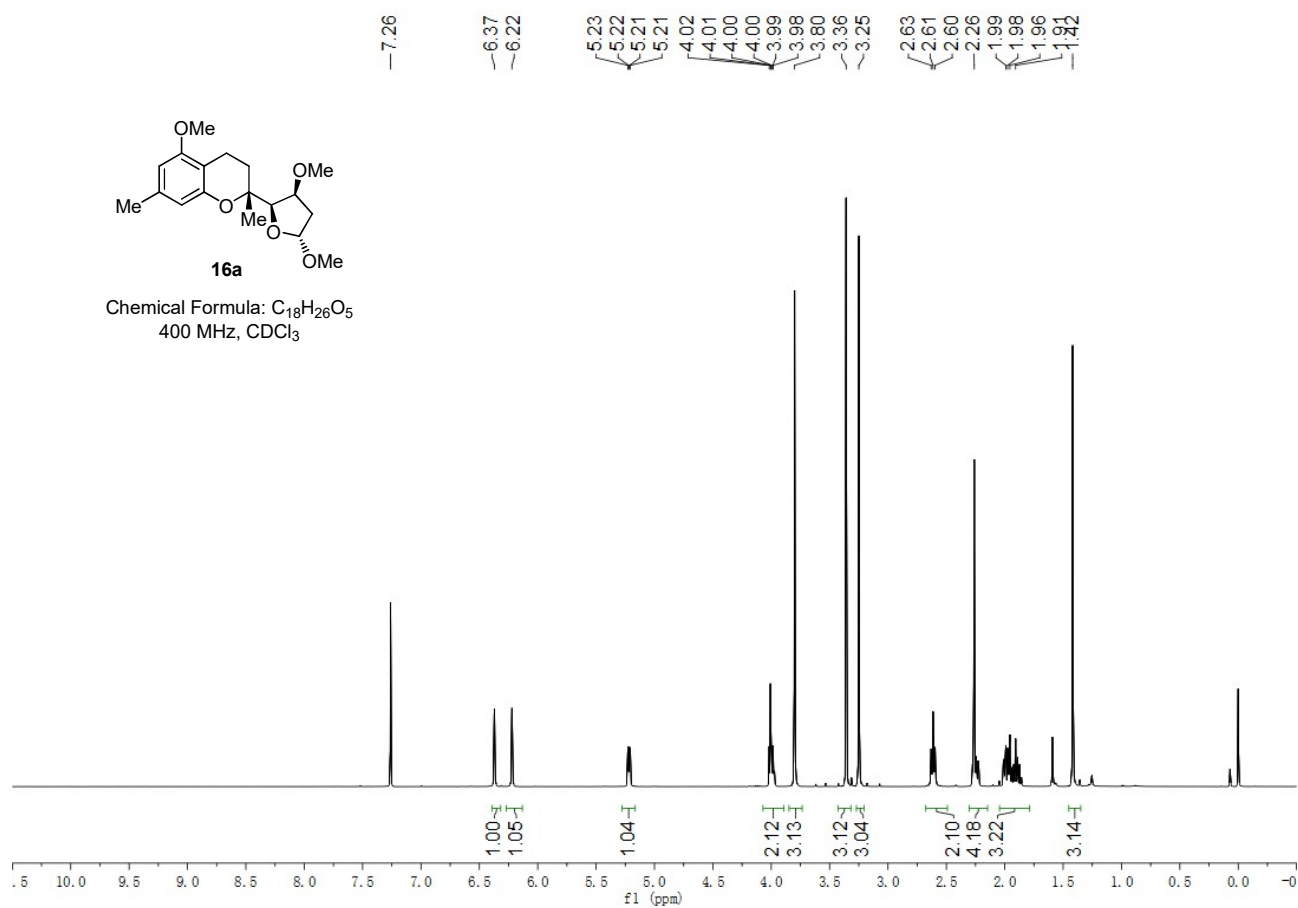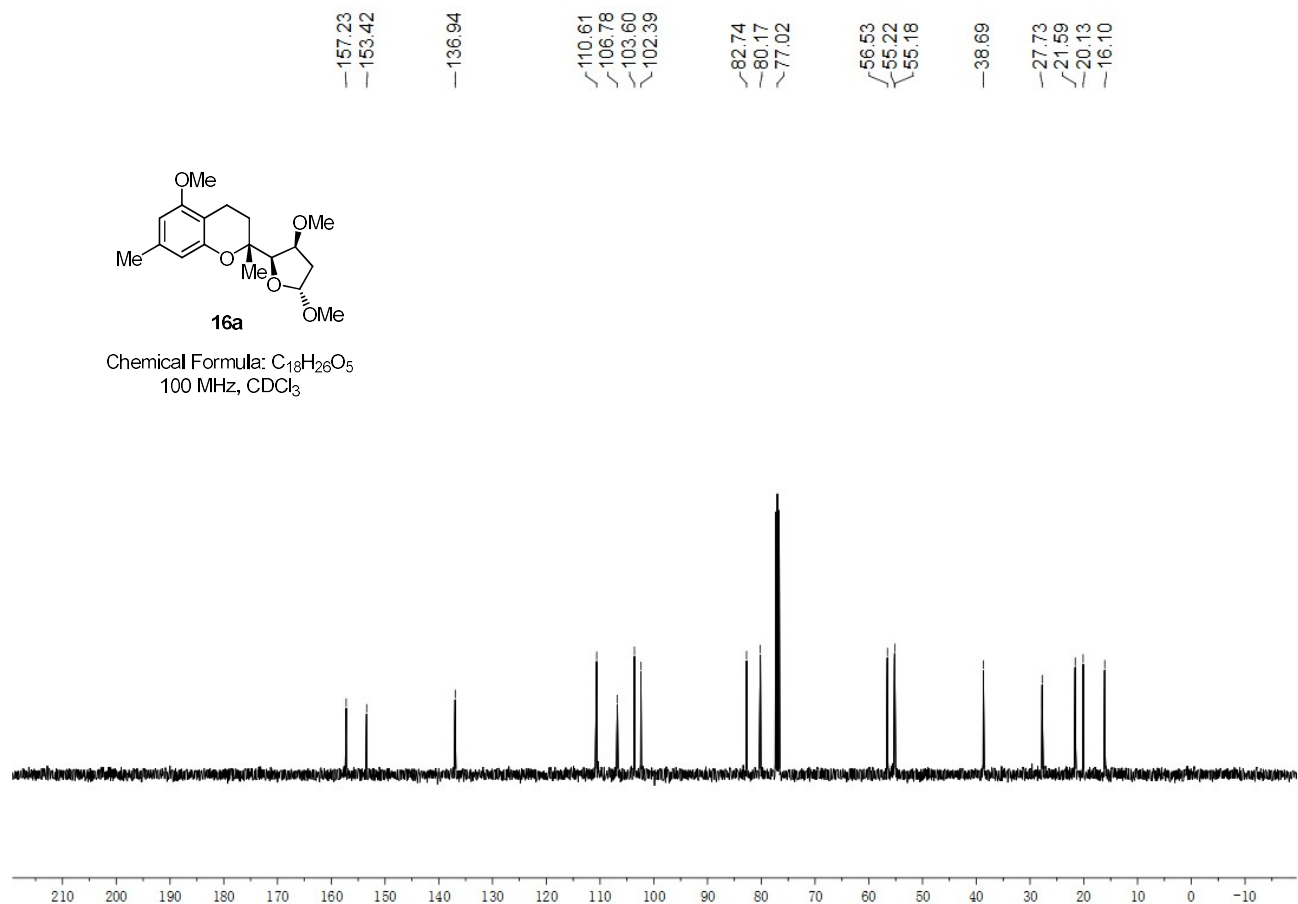

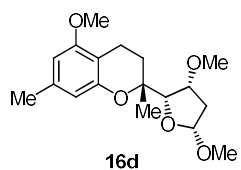

Chemical Formula:  $C_{18}H_{26}O_5$   
400 MHz,  $CDCl_3$

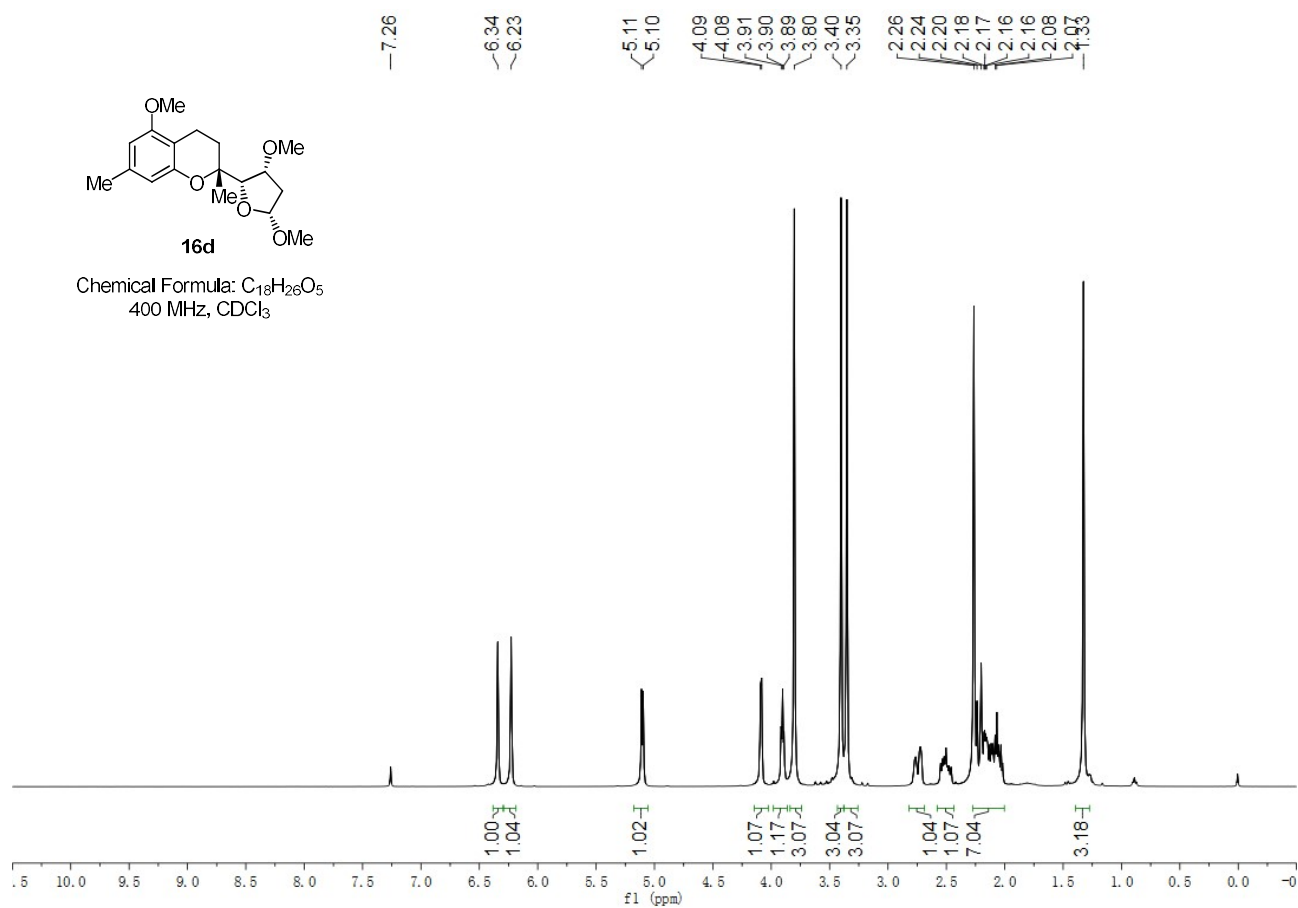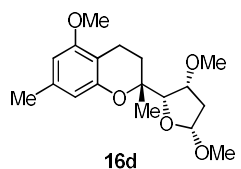

Chemical Formula:  $C_{18}H_{26}O_5$   
100 MHz,  $CDCl_3$

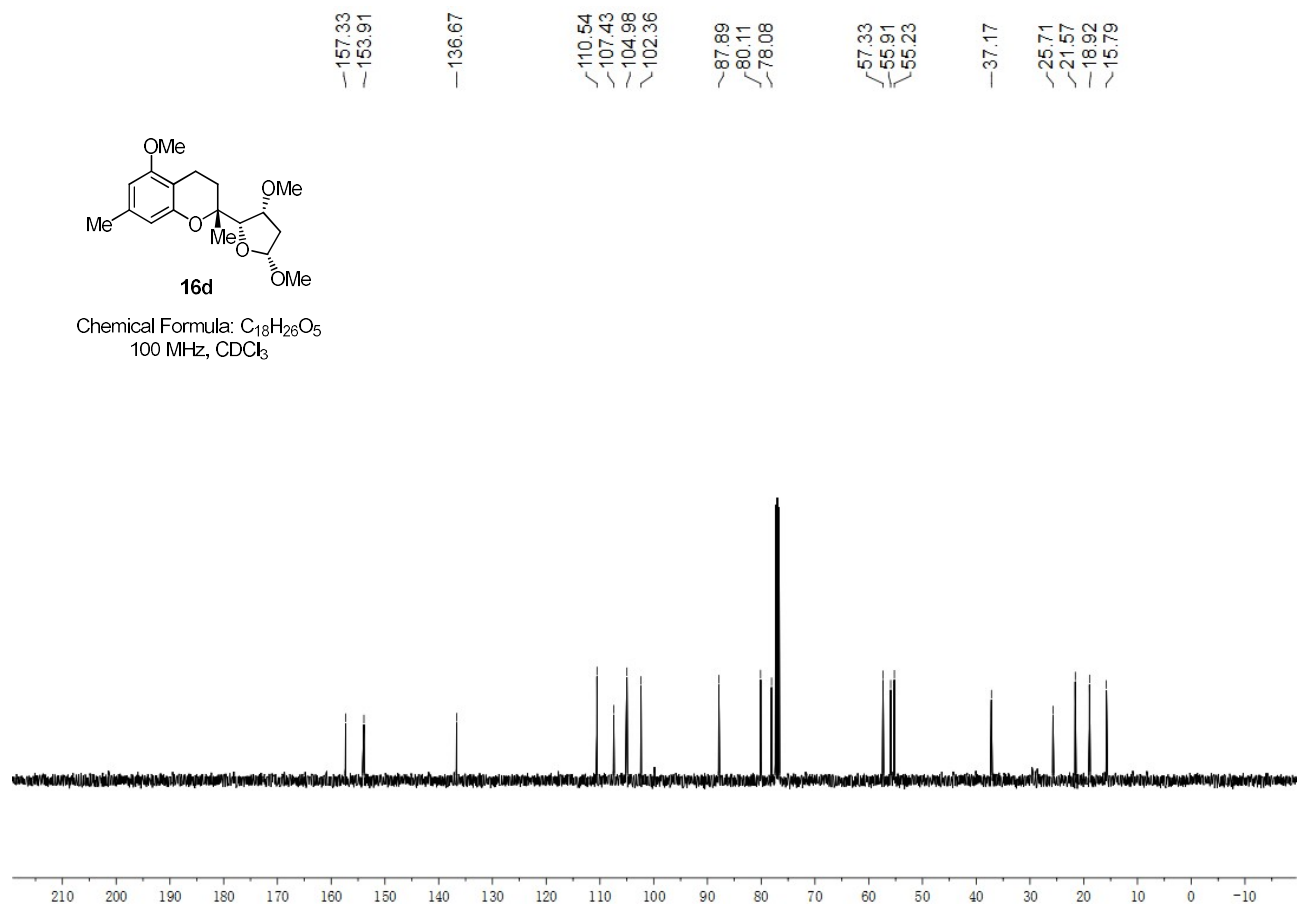



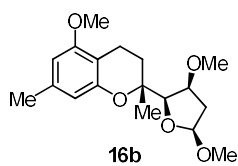

Chemical Formula: C<sub>18</sub>H<sub>26</sub>O<sub>5</sub>  
400 MHz, CDCl<sub>3</sub>

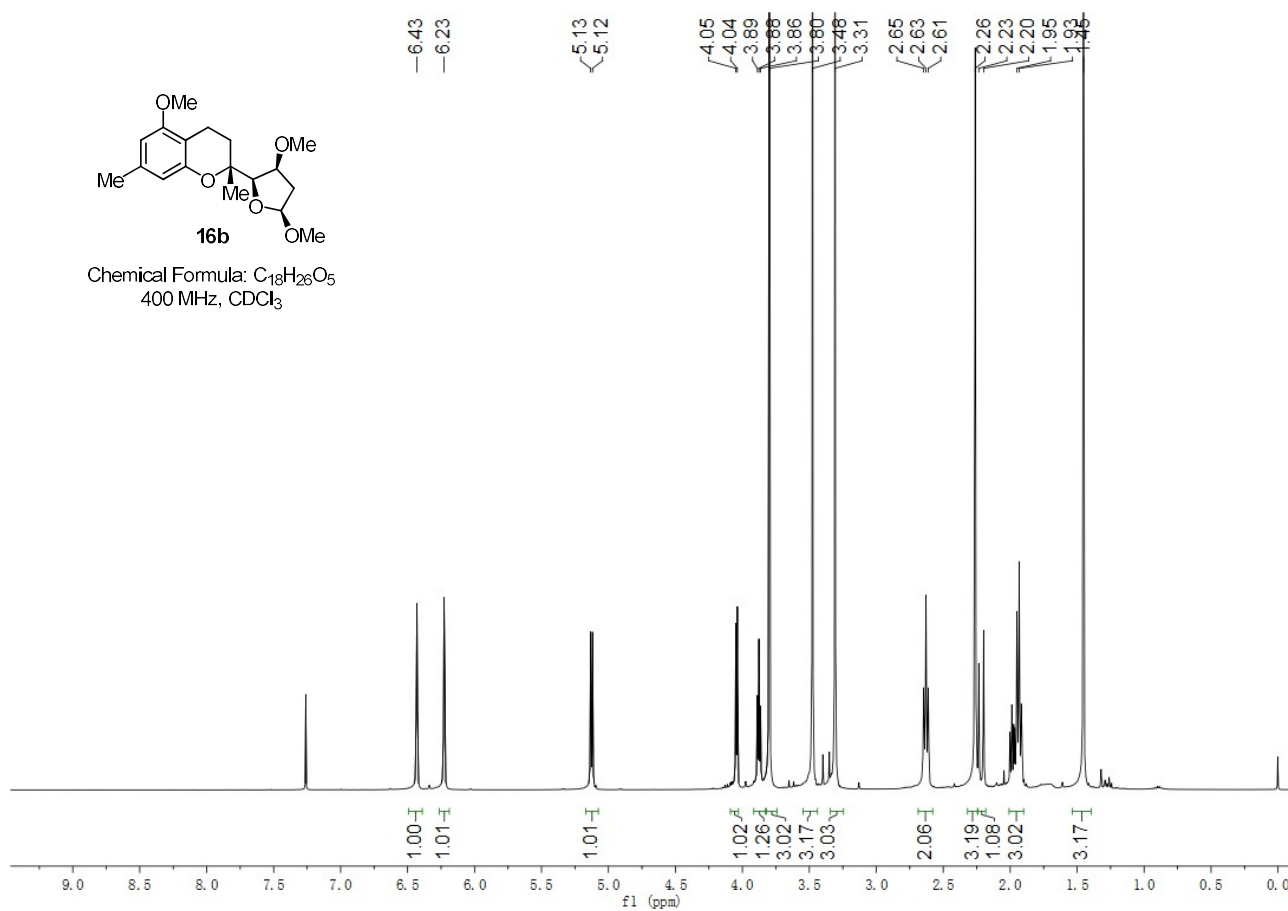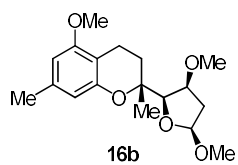

Chemical Formula: C<sub>18</sub>H<sub>26</sub>O<sub>5</sub>  
100 MHz, CDCl<sub>3</sub>

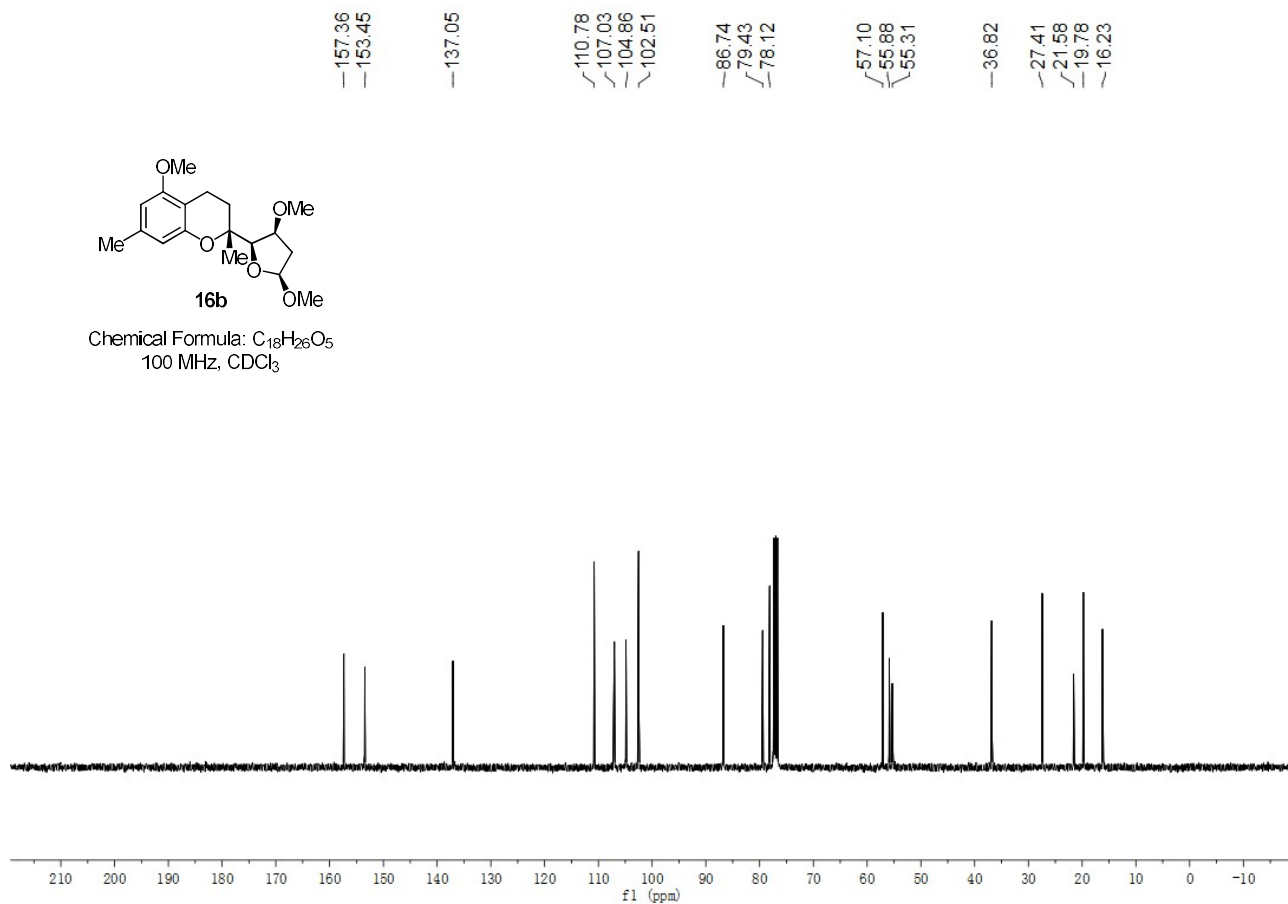

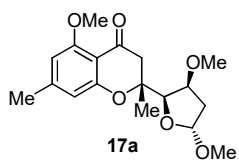

Chemical Formula:  $C_{18}H_{24}O_6$   
400 MHz,  $CDCl_3$

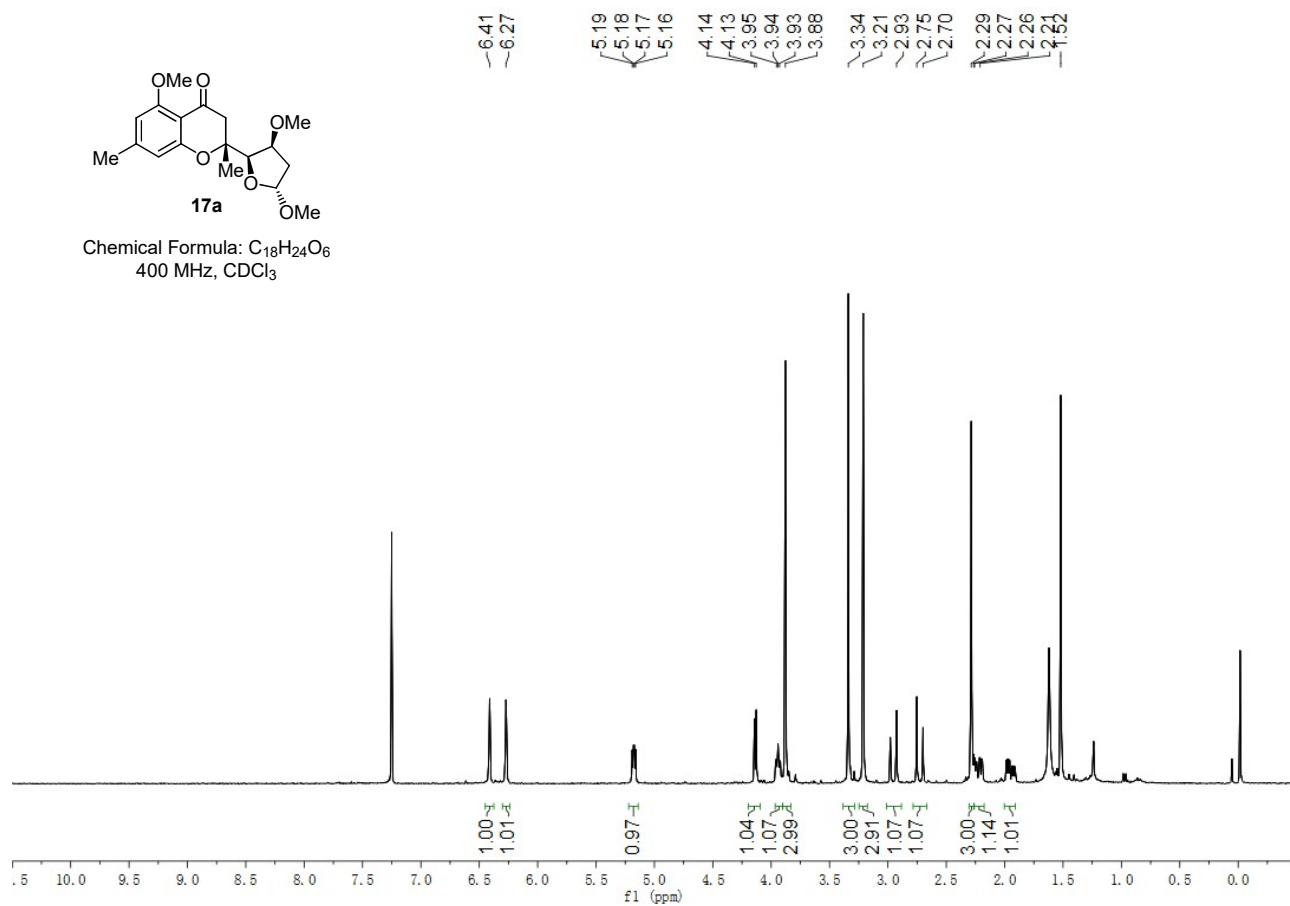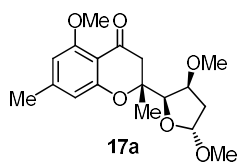

Chemical Formula:  $C_{18}H_{24}O_6$   
100 MHz,  $CDCl_3$

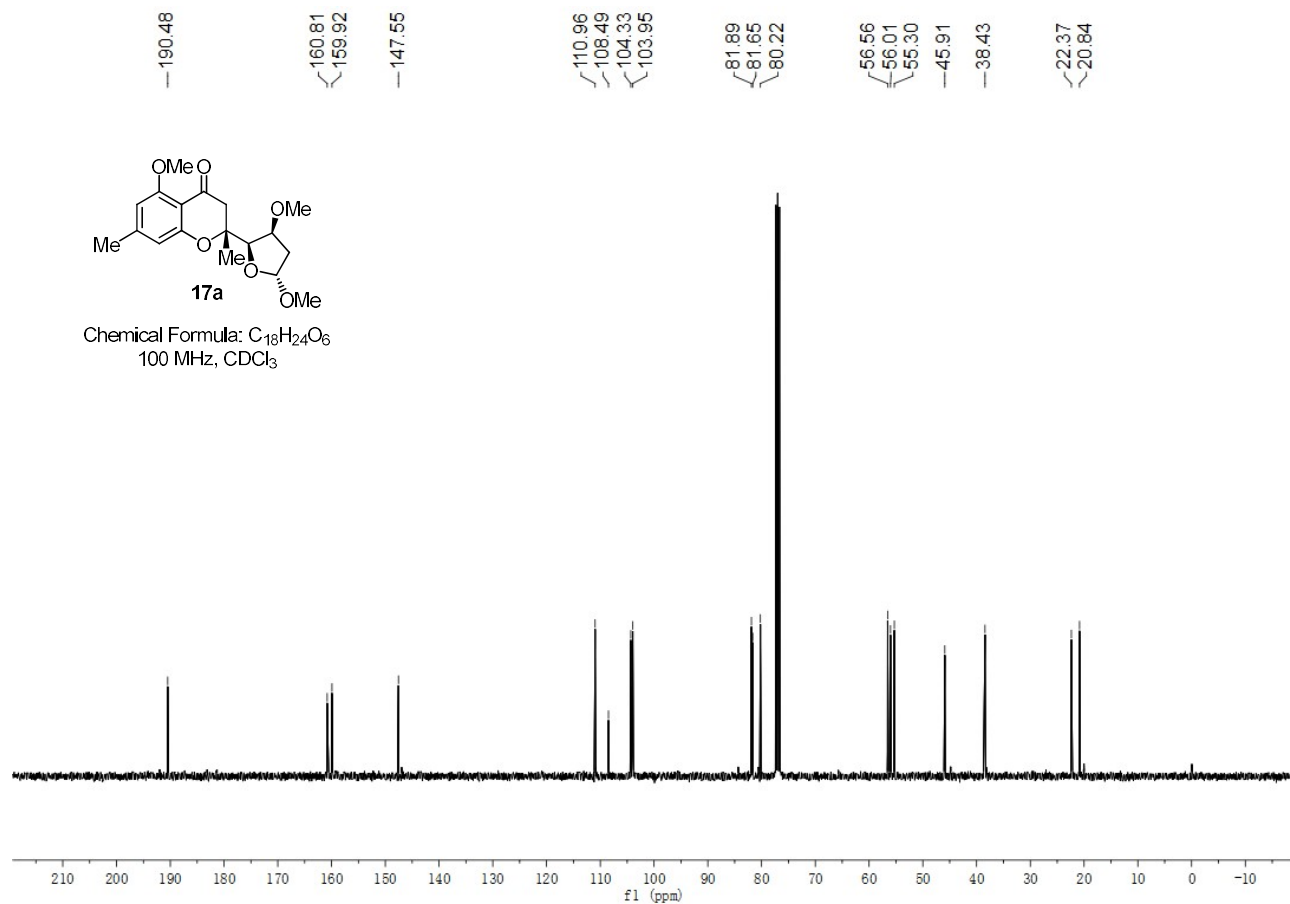

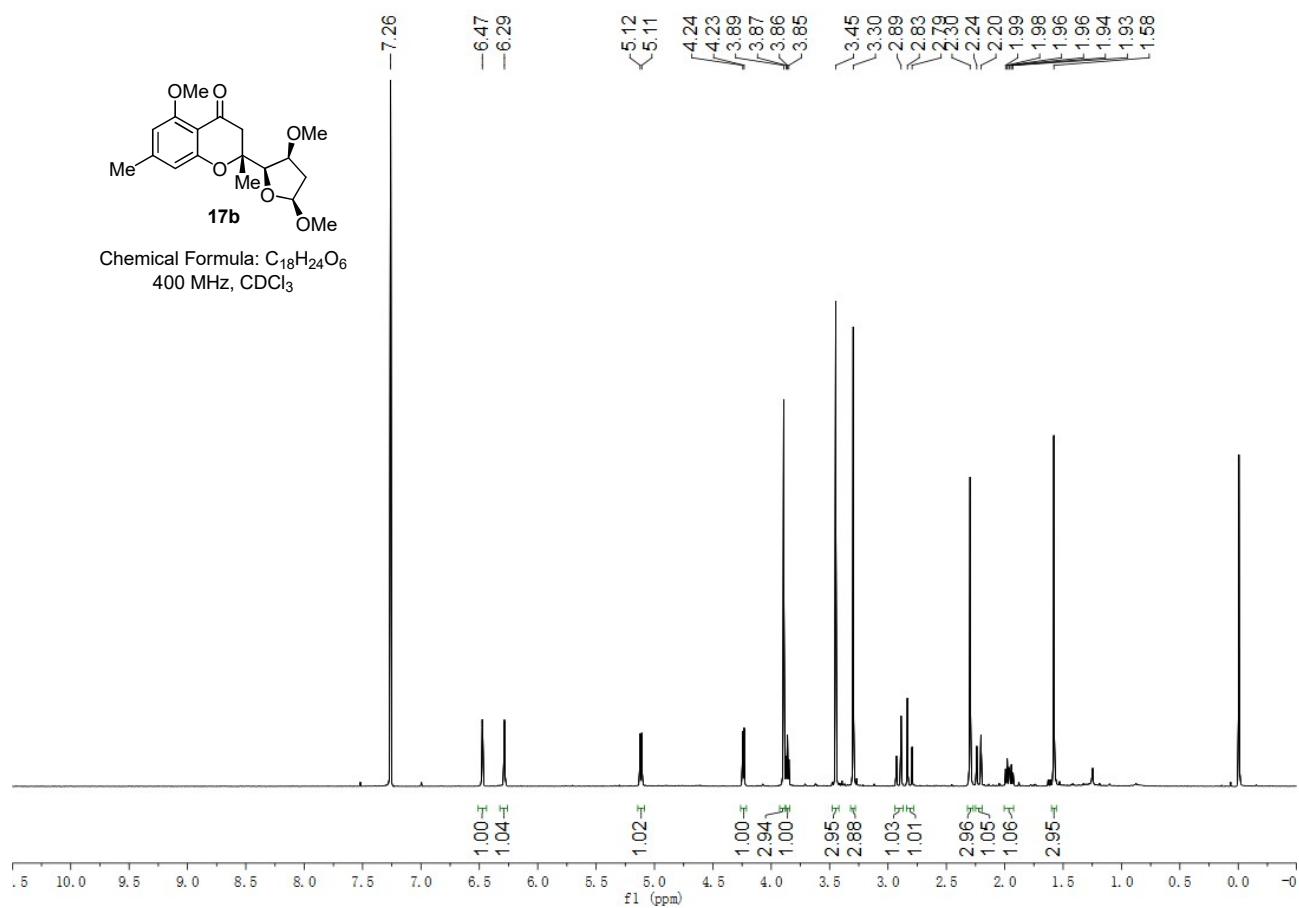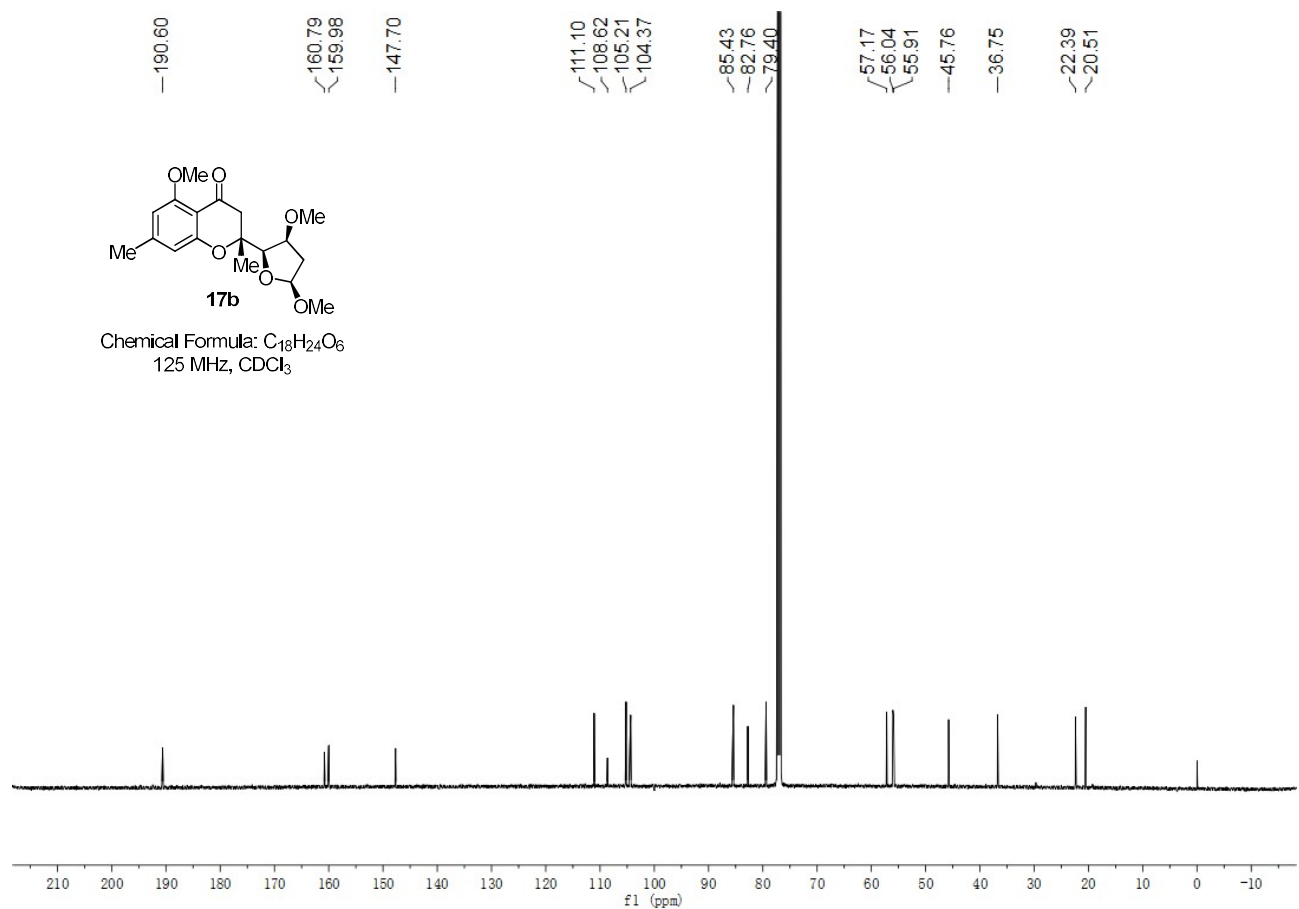

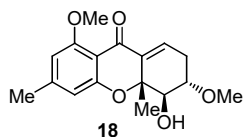

Chemical Formula: C<sub>17</sub>H<sub>20</sub>O<sub>5</sub>  
400 MHz, CDCl<sub>3</sub>

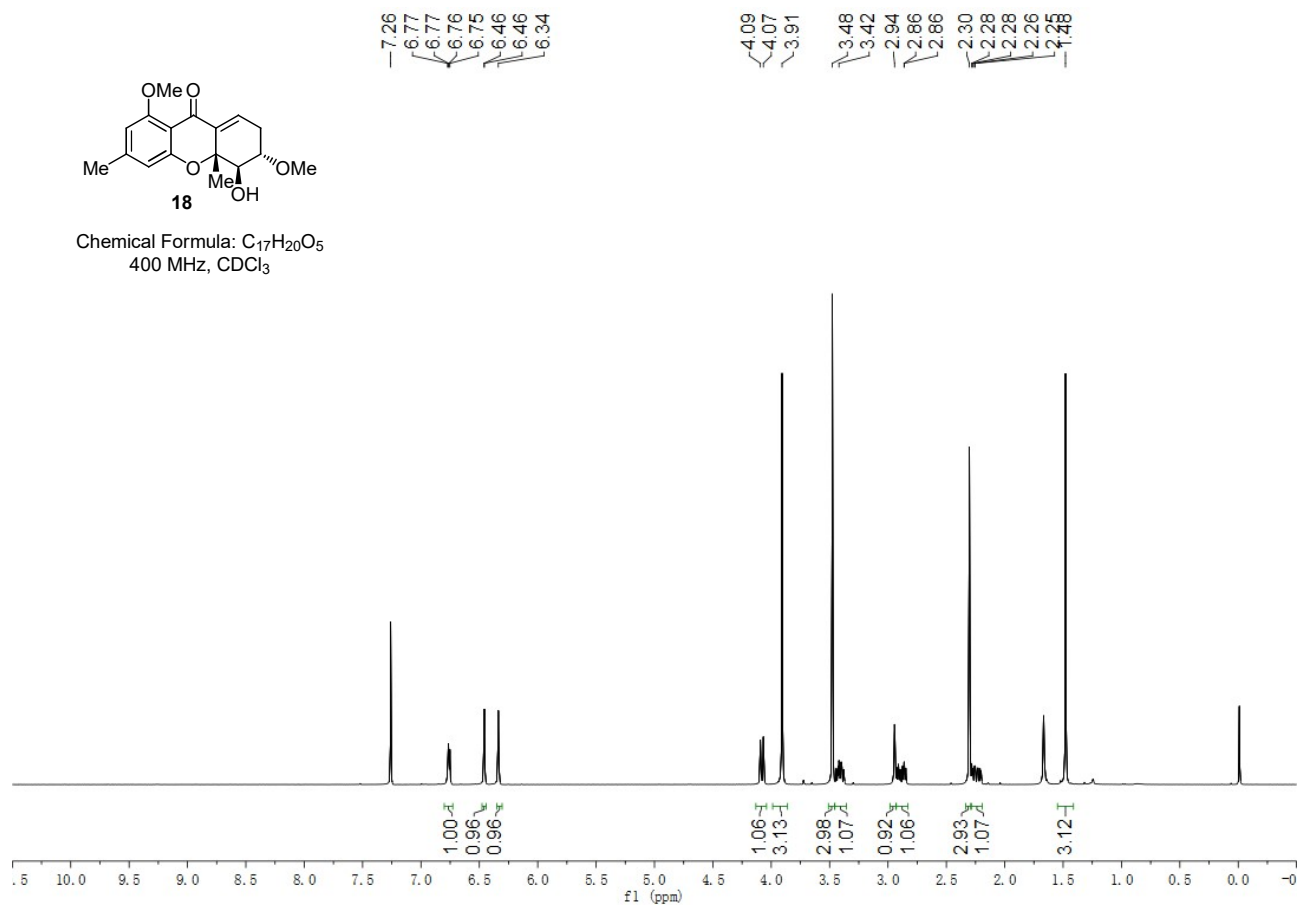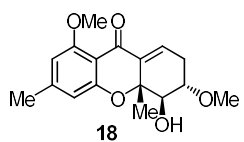

Chemical Formula: C<sub>17</sub>H<sub>20</sub>O<sub>5</sub>  
100 MHz, CDCl<sub>3</sub>

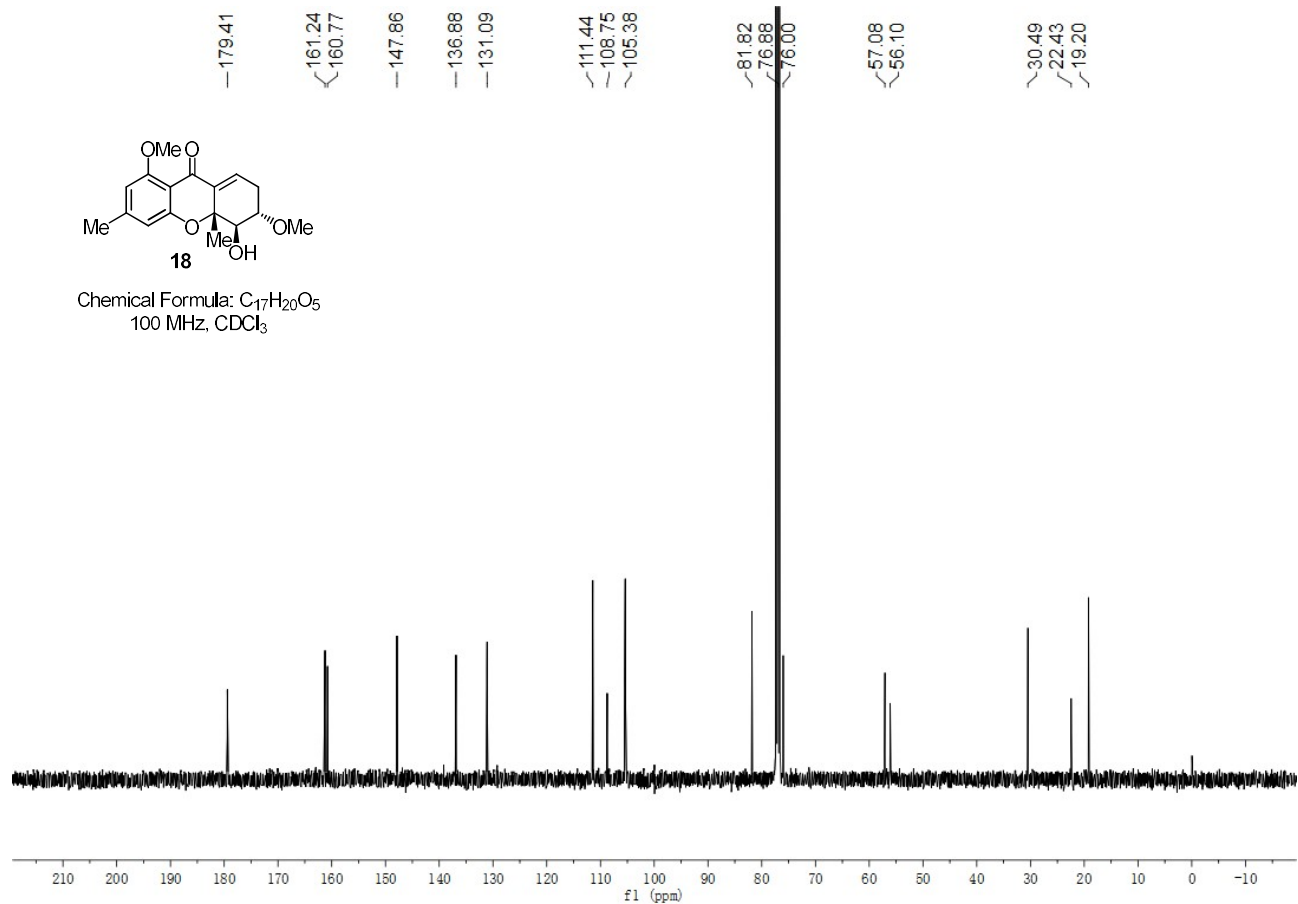

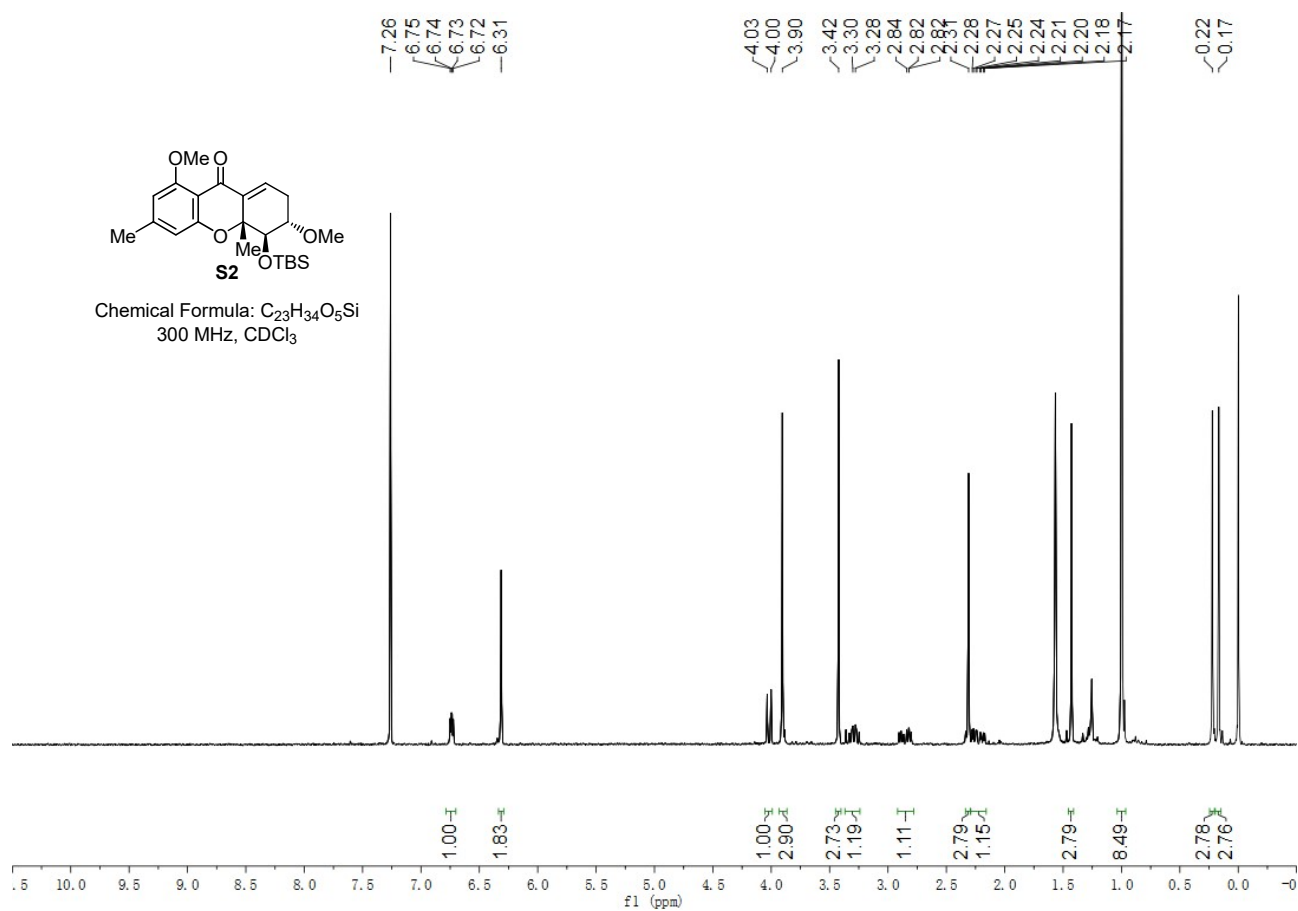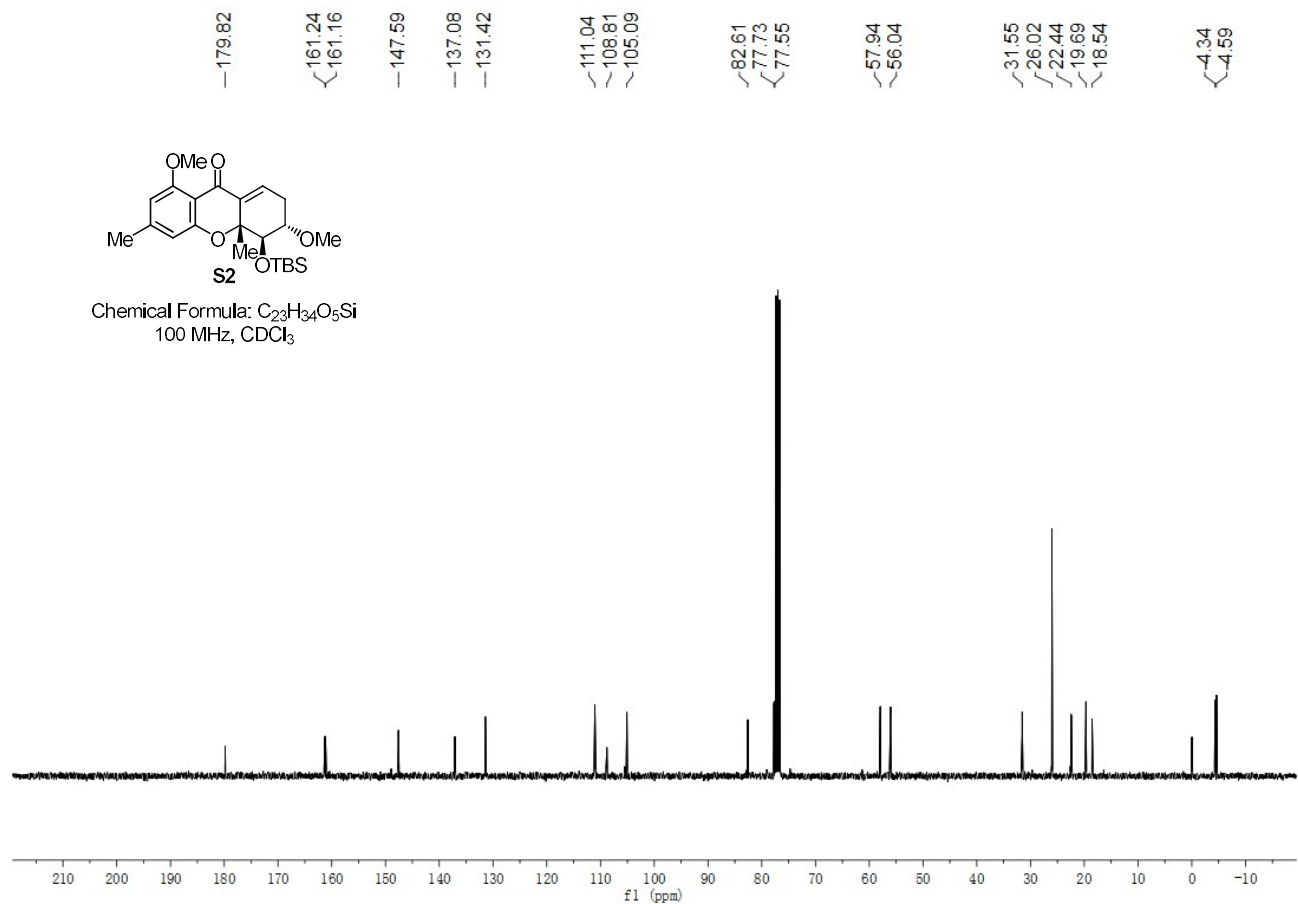

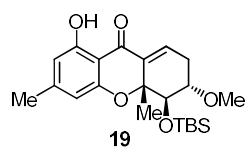

Chemical Formula:  $C_{22}H_{32}O_5Si$   
500 MHz,  $CDCl_3$

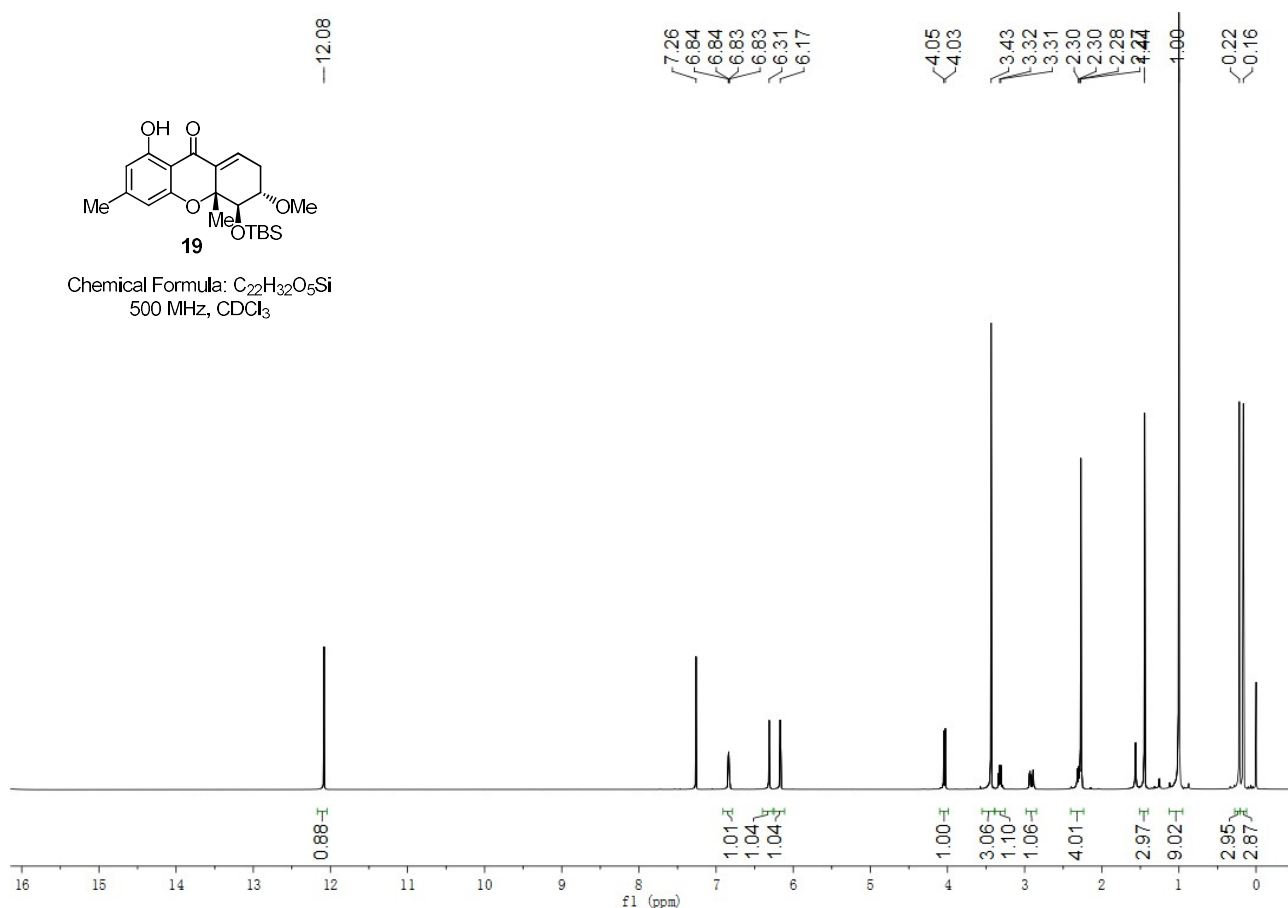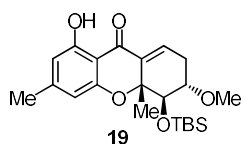

Chemical Formula:  $C_{22}H_{32}O_5Si$   
125 MHz,  $CDCl_3$

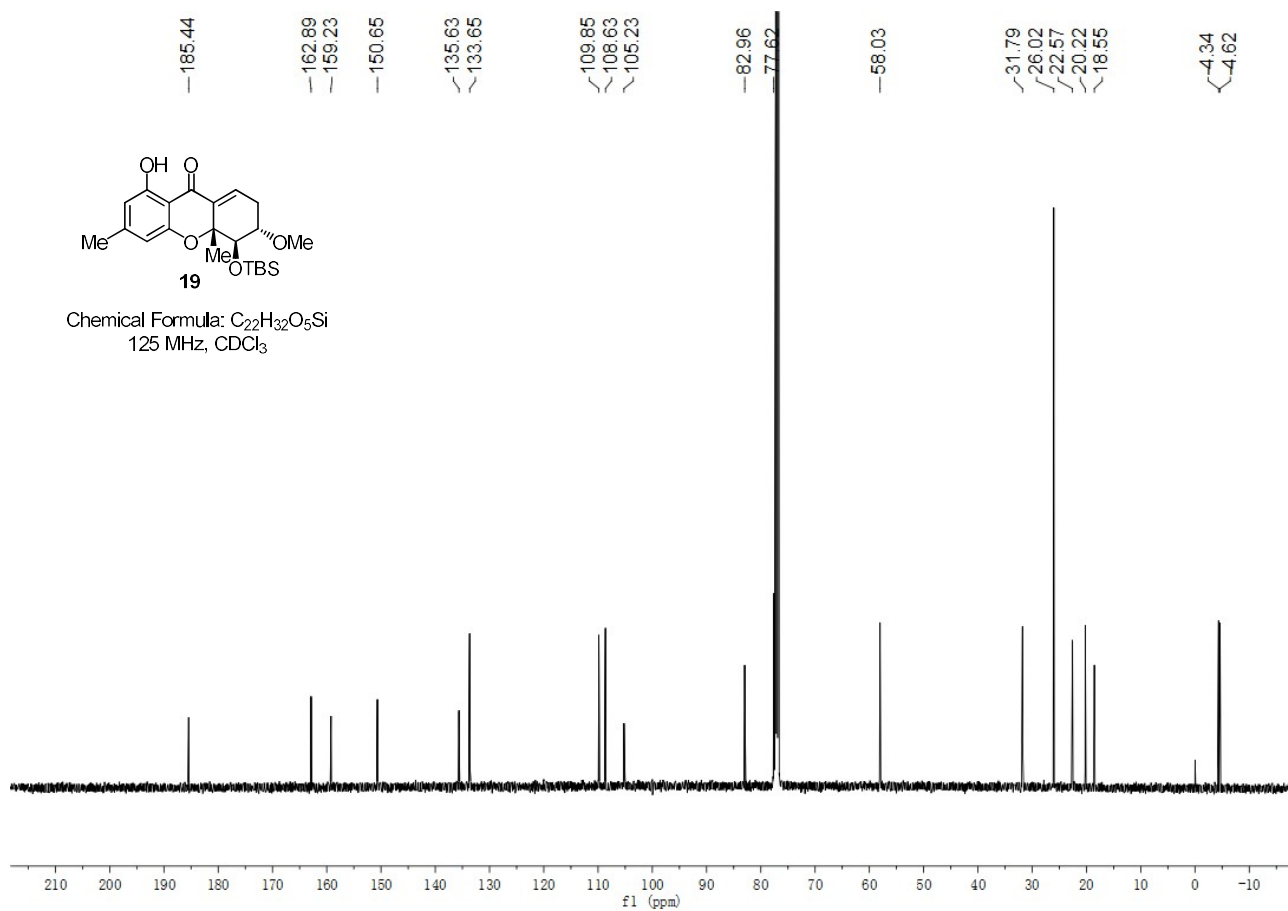

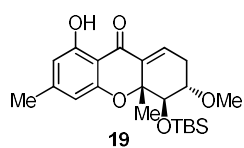

Chemical Formula:  $C_{22}H_{32}O_5Si$   
125 MHz,  $CDCl_3$

133.65, 109.85, 108.63, 77.62, 77.24, 58.03, 31.79, 26.01, 22.57, 20.22, 4.34, 4.62

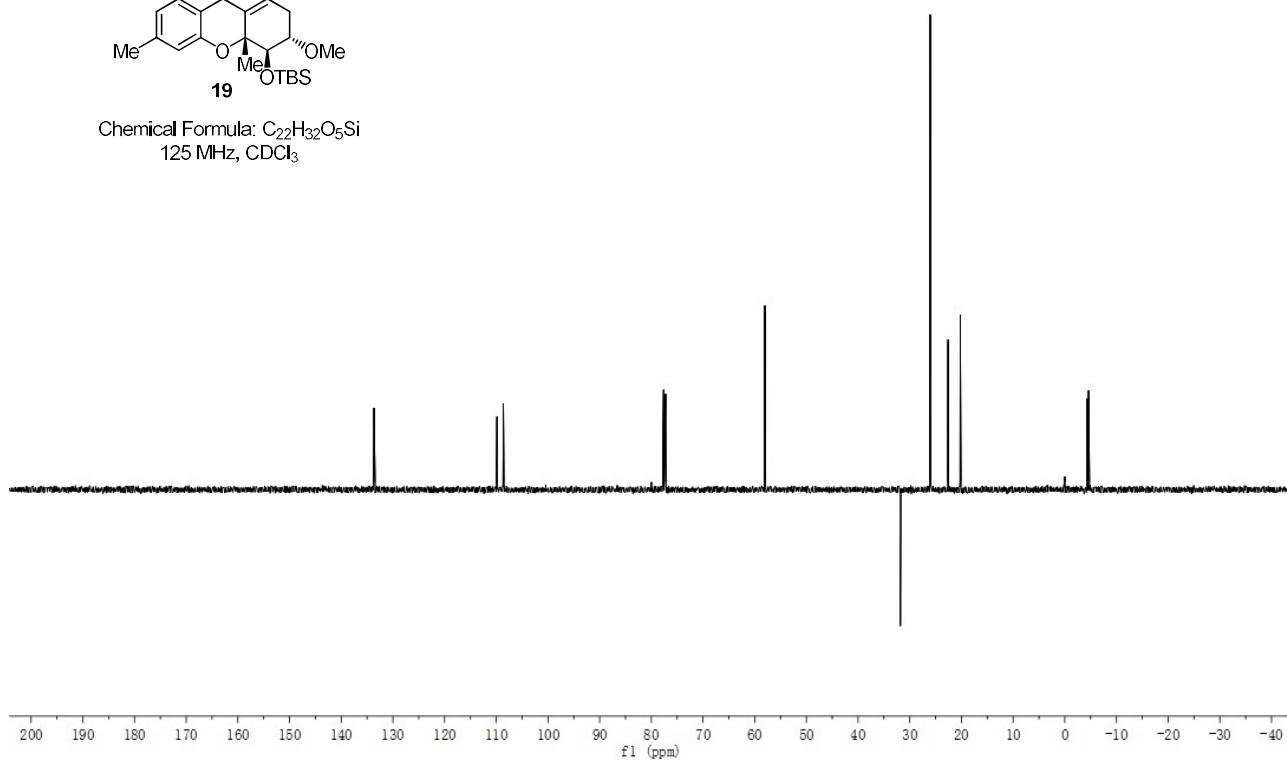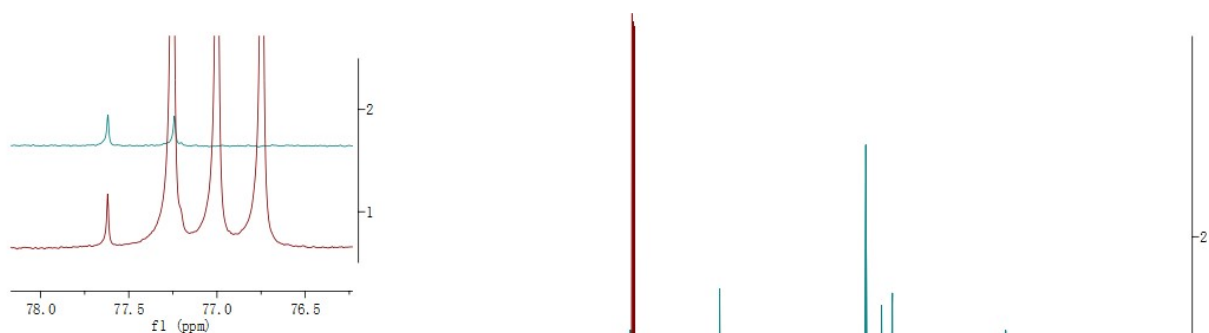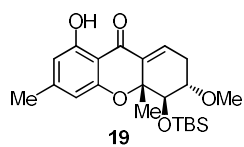

Chemical Formula:  $C_{22}H_{32}O_5Si$   
125 MHz,  $CDCl_3$

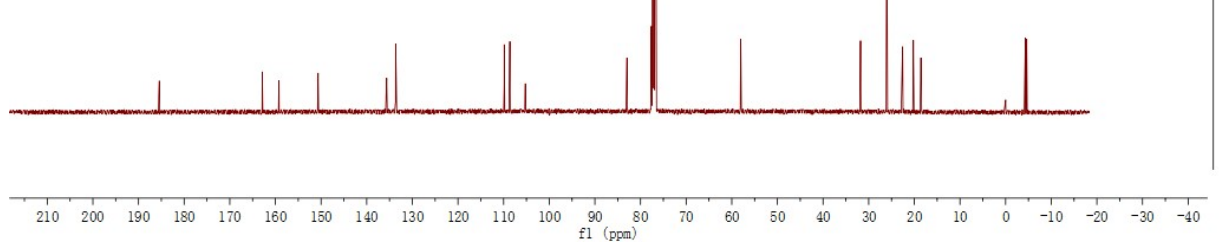

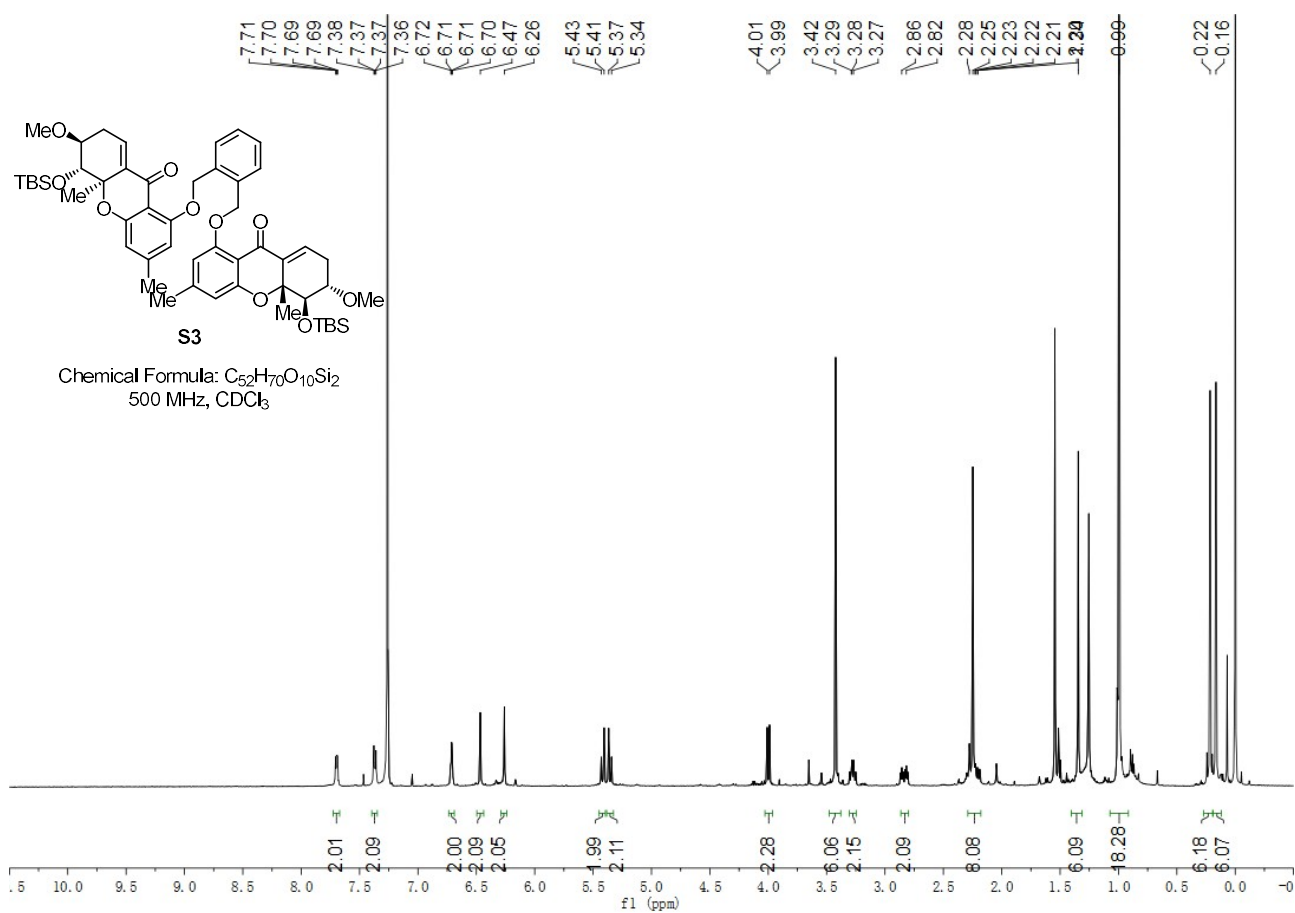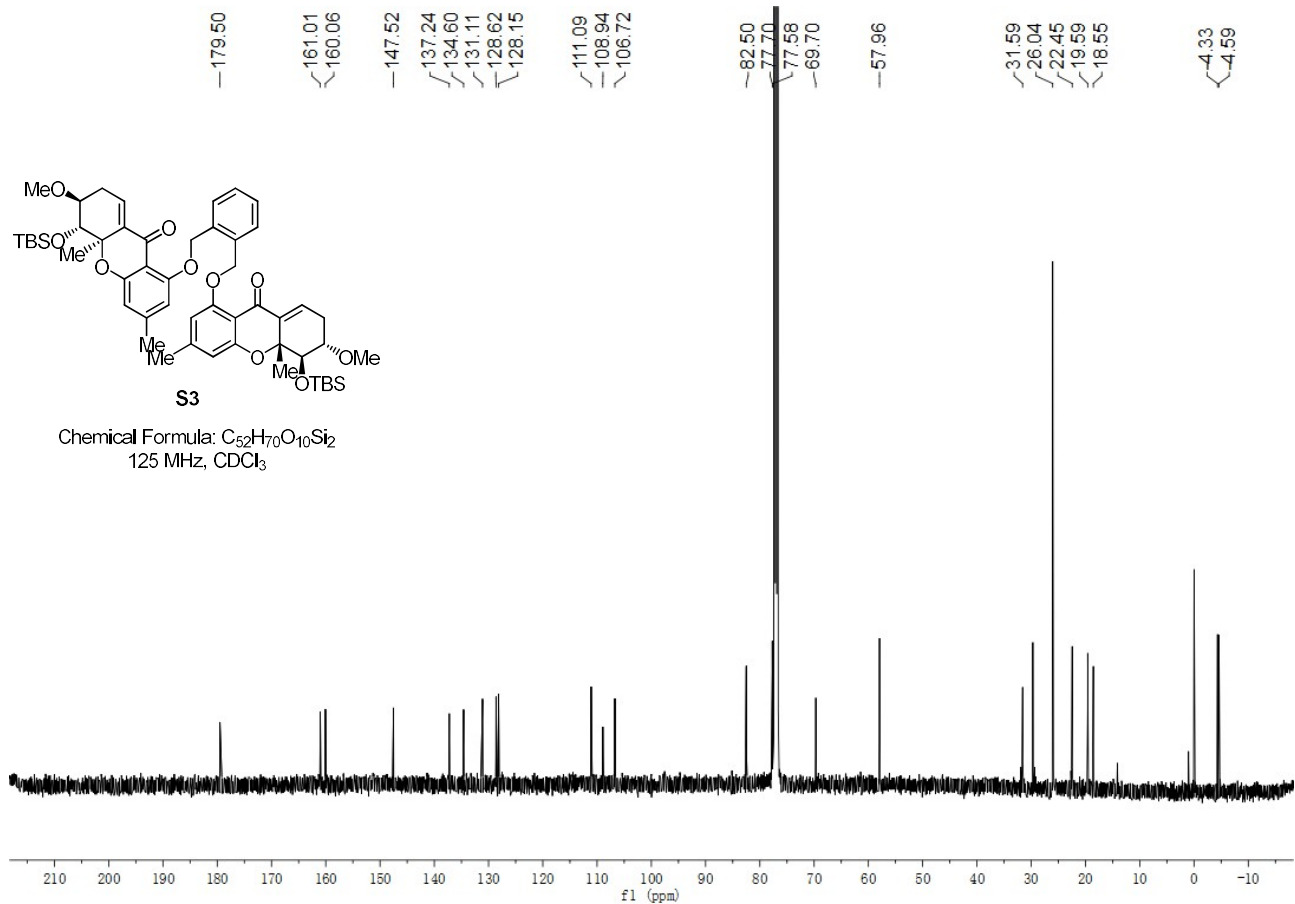



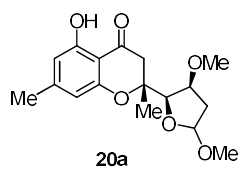

Chemical Formula: C<sub>17</sub>H<sub>22</sub>O<sub>6</sub>  
400 MHz, CDCl<sub>3</sub>

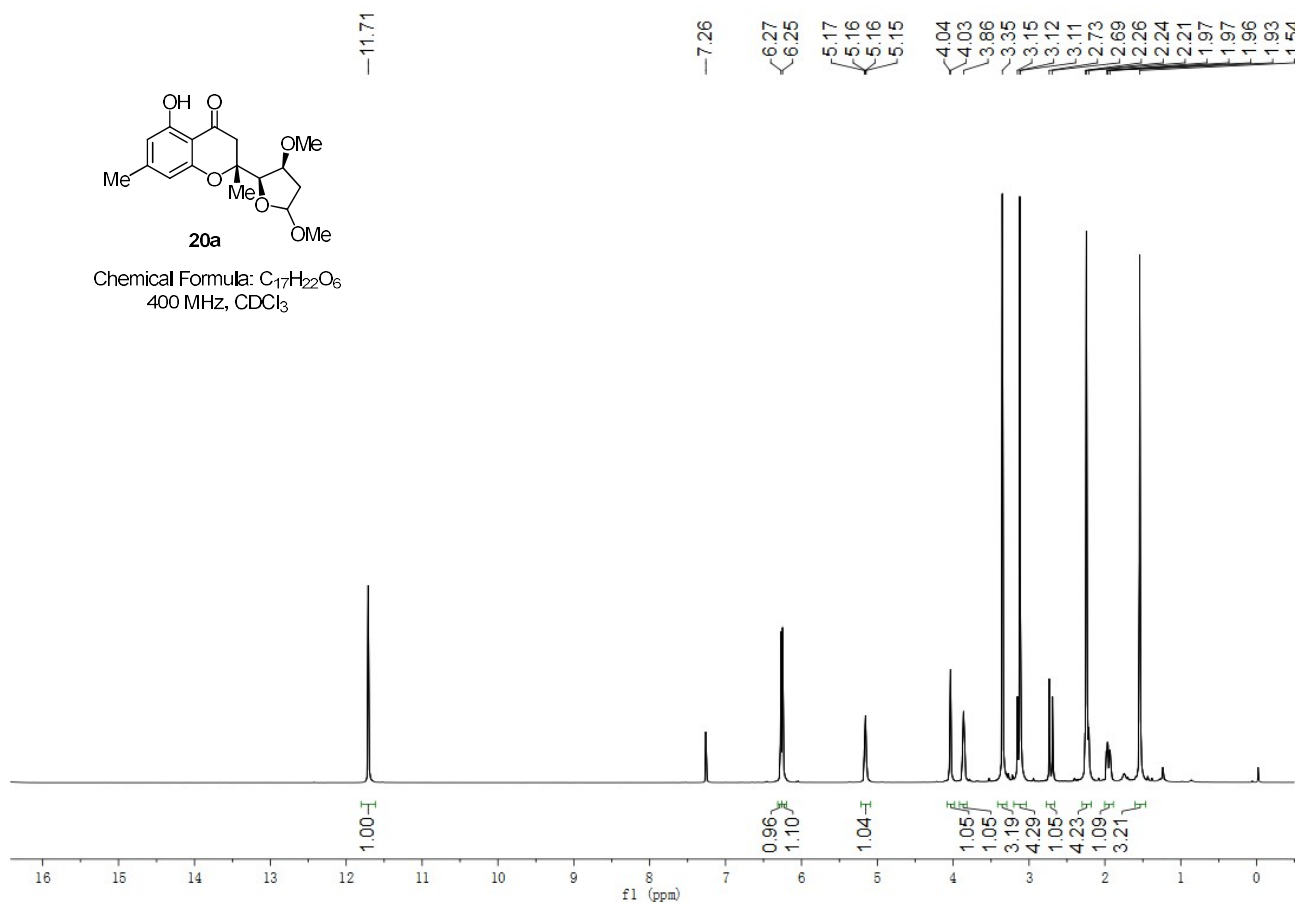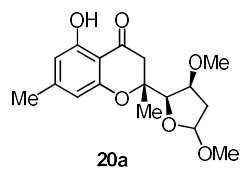

Chemical Formula: C<sub>17</sub>H<sub>22</sub>O<sub>6</sub>  
100 MHz, CDCl<sub>3</sub>

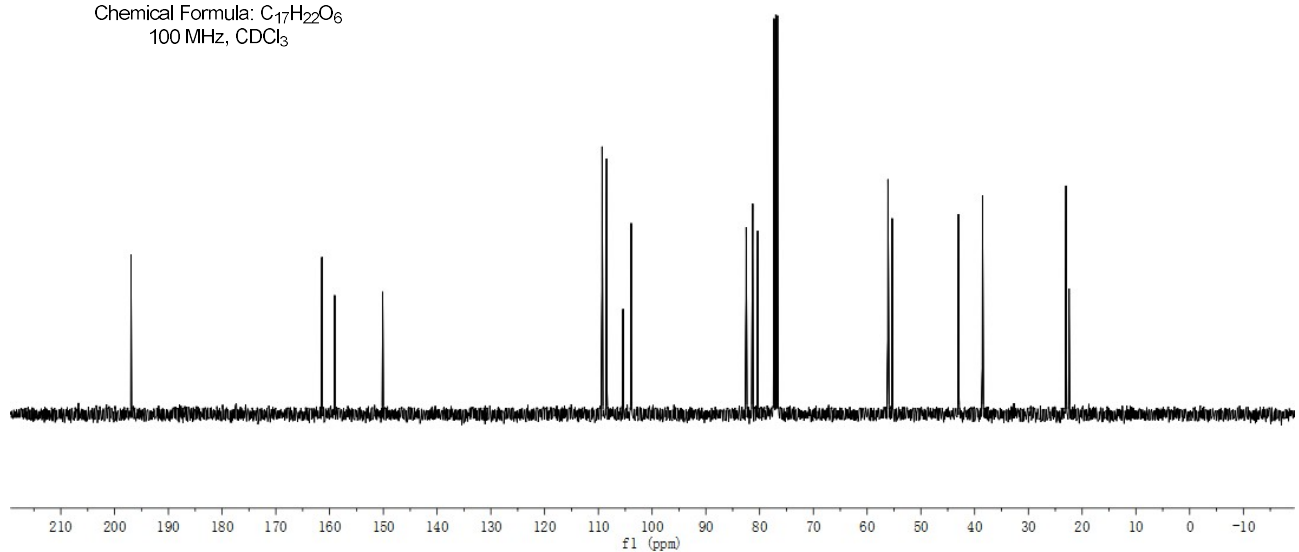

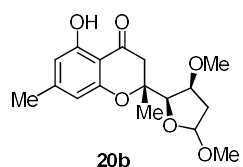

Chemical Formula: C<sub>17</sub>H<sub>22</sub>O<sub>6</sub>  
400 MHz, CDCl<sub>3</sub>

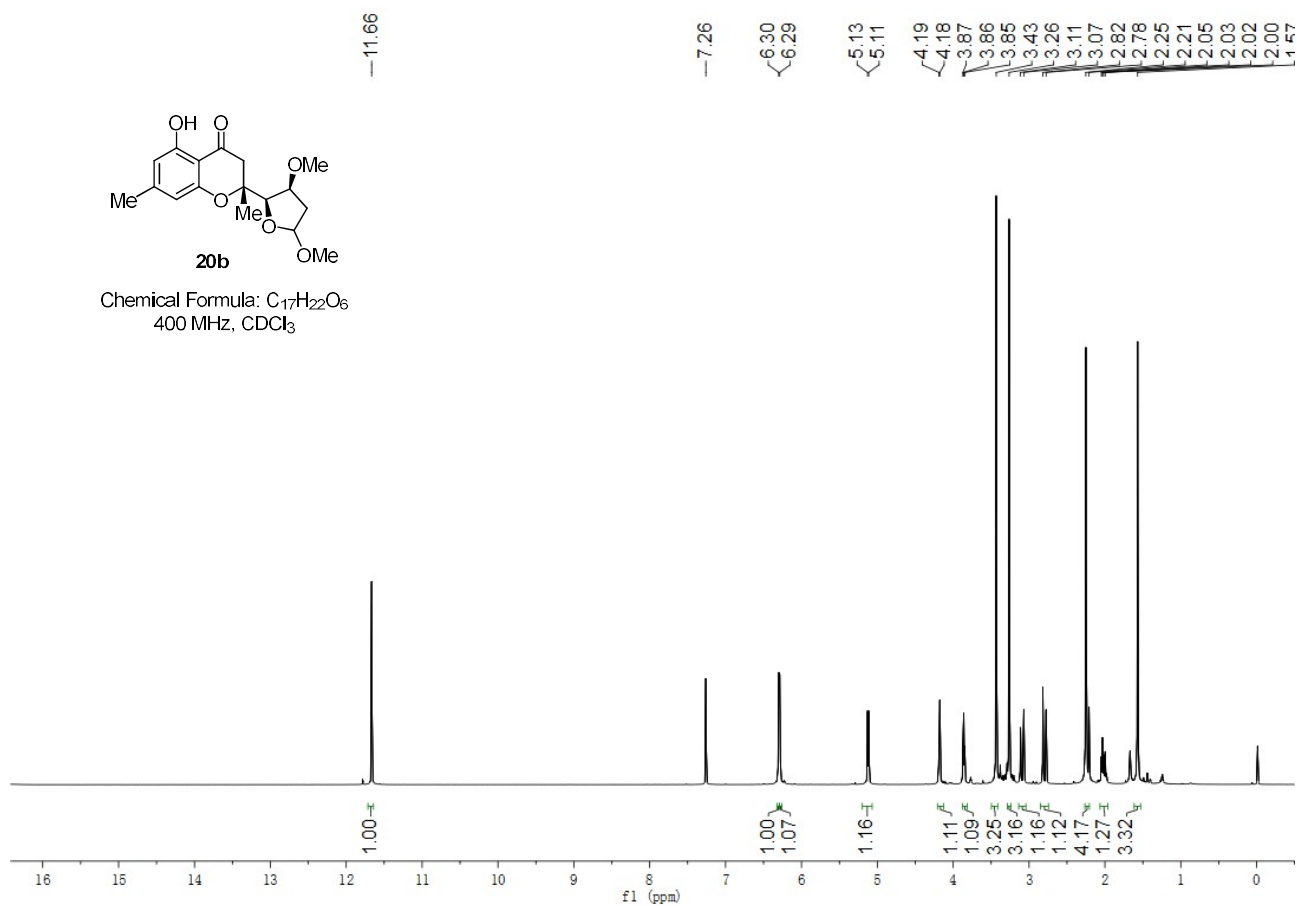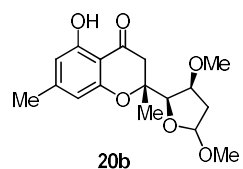

Chemical Formula: C<sub>17</sub>H<sub>22</sub>O<sub>6</sub>  
100 MHz, CDCl<sub>3</sub>

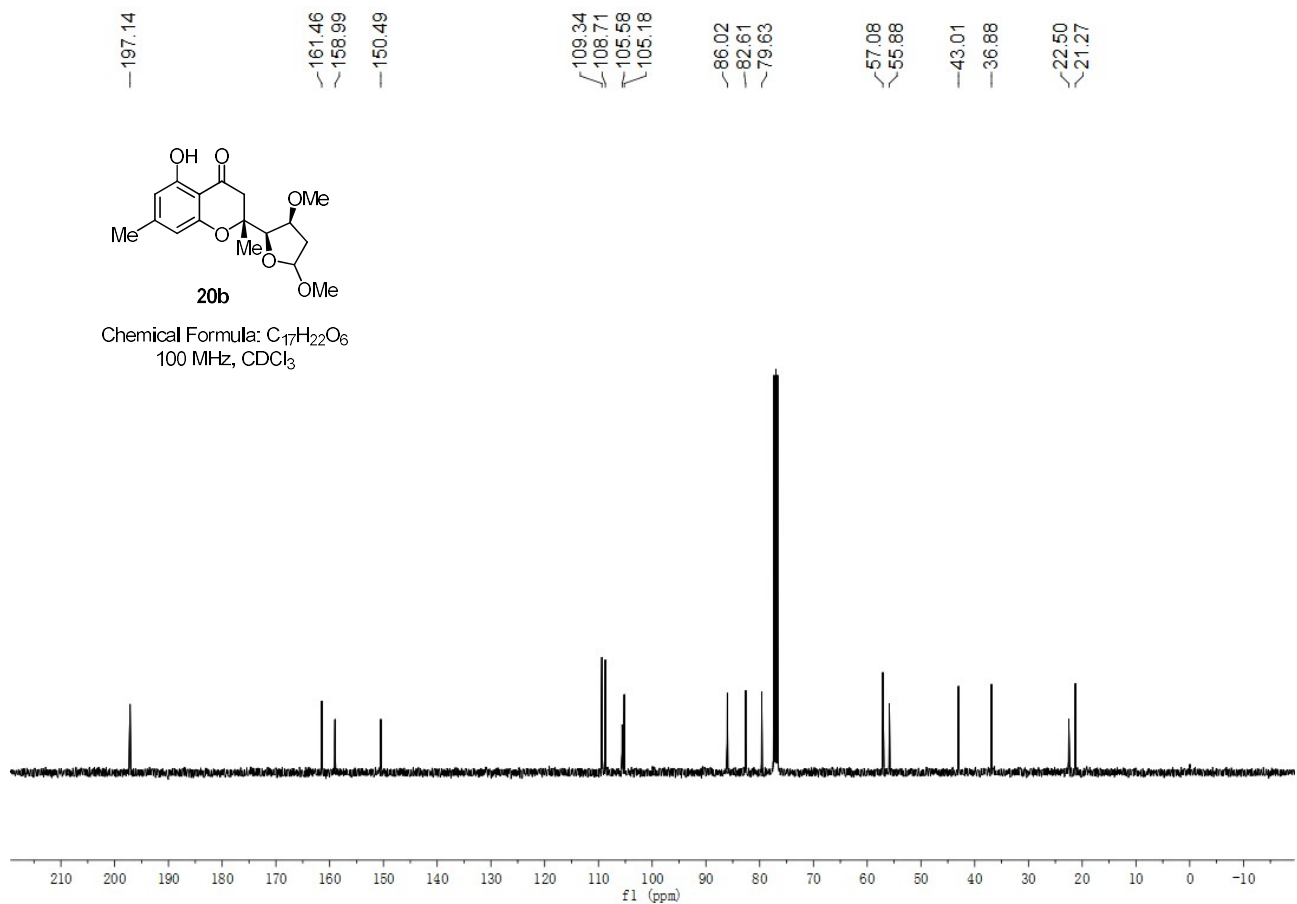

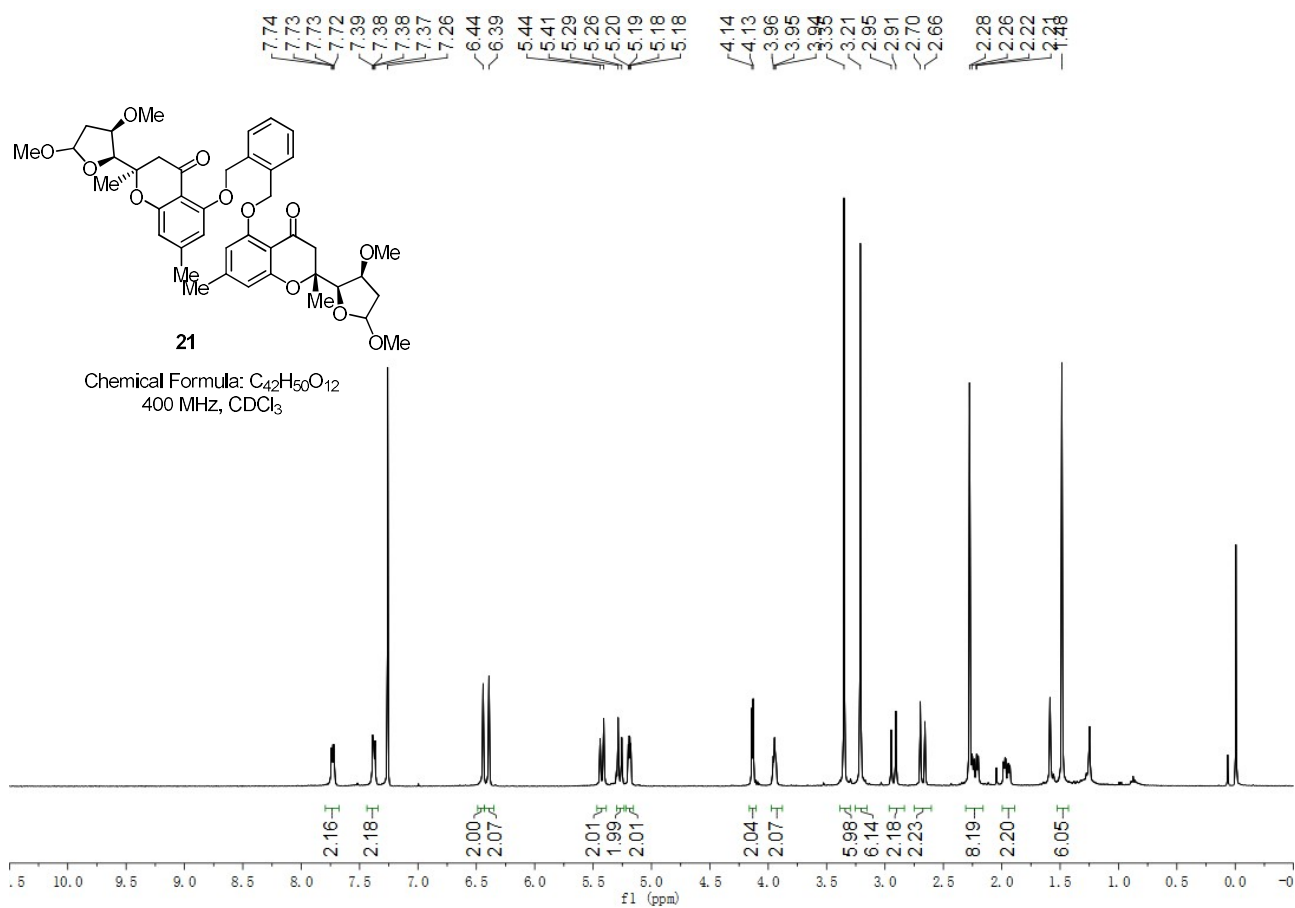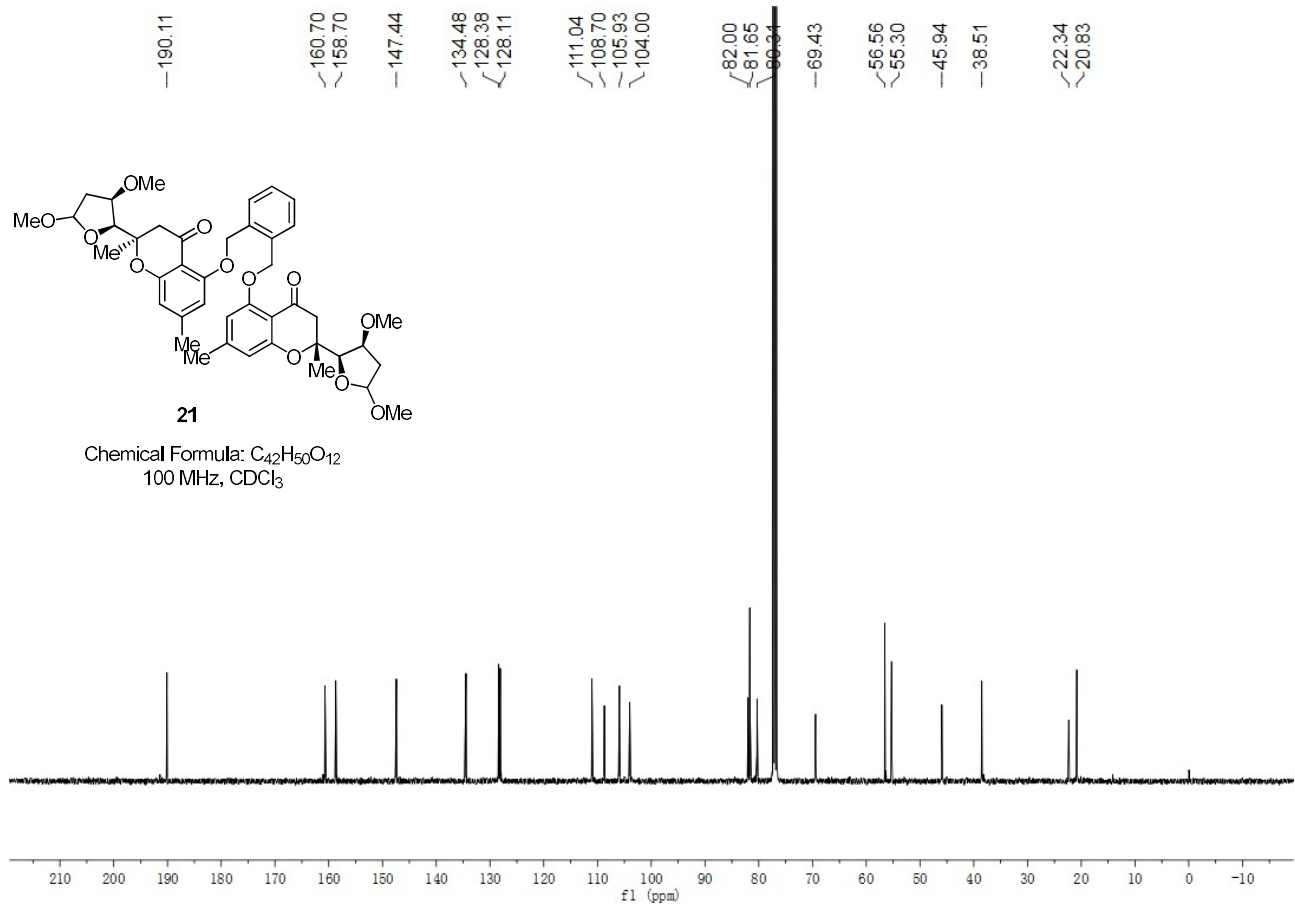

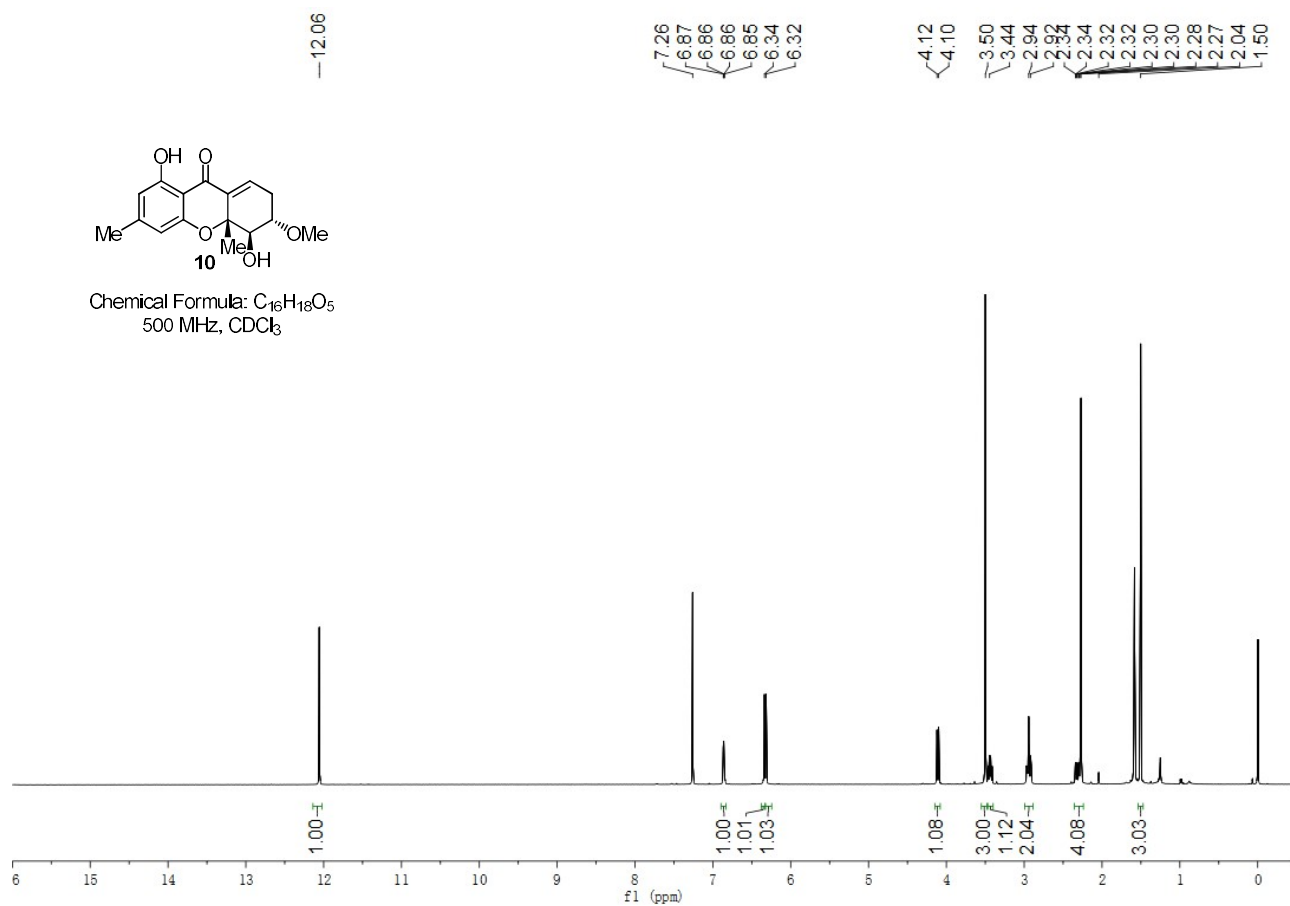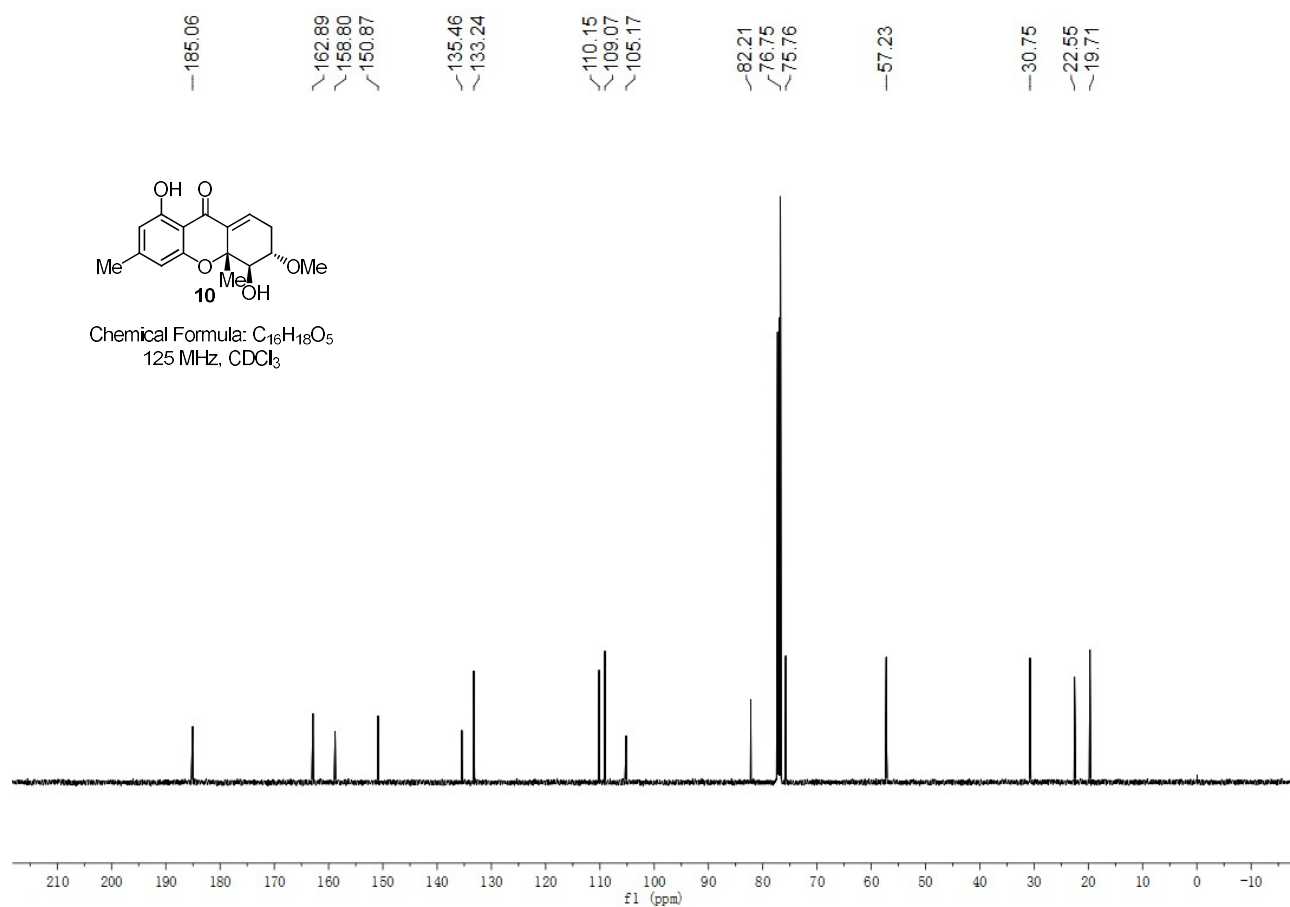

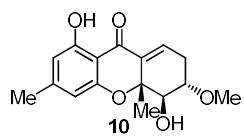

Chemical Formula:  $C_{16}H_{18}O_5$   
125 MHz,  $CDCl_3$

133.24  
110.16  
109.07  
76.75  
75.76  
57.23  
30.75  
22.55  
19.71

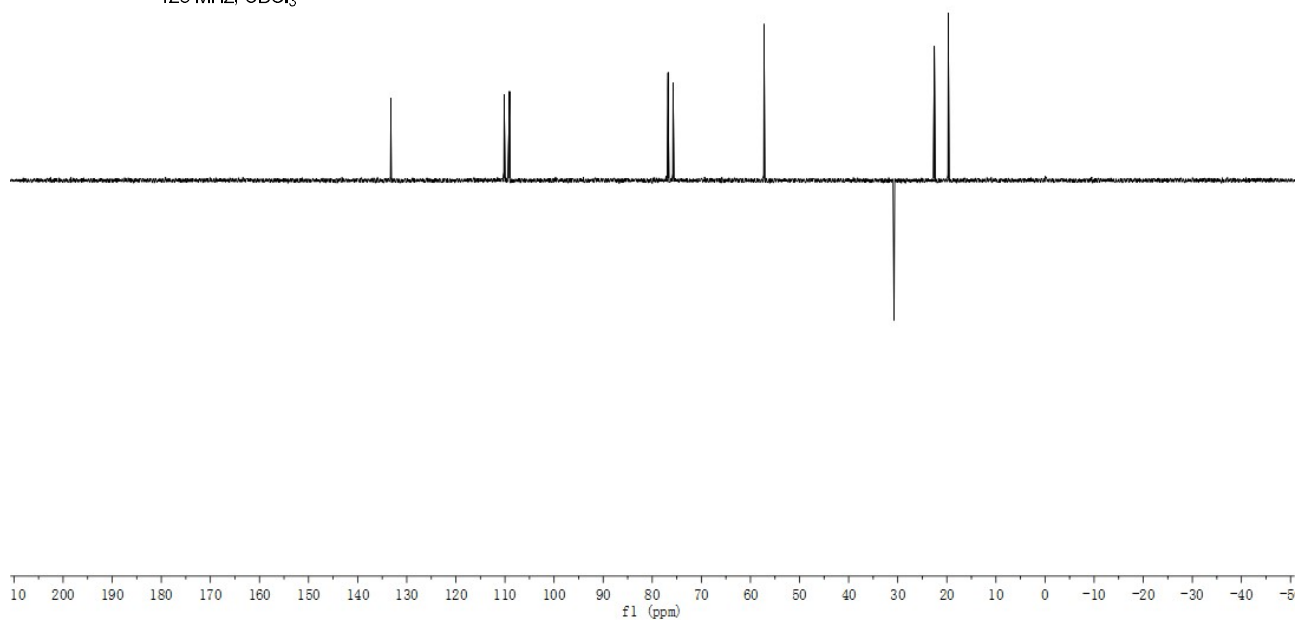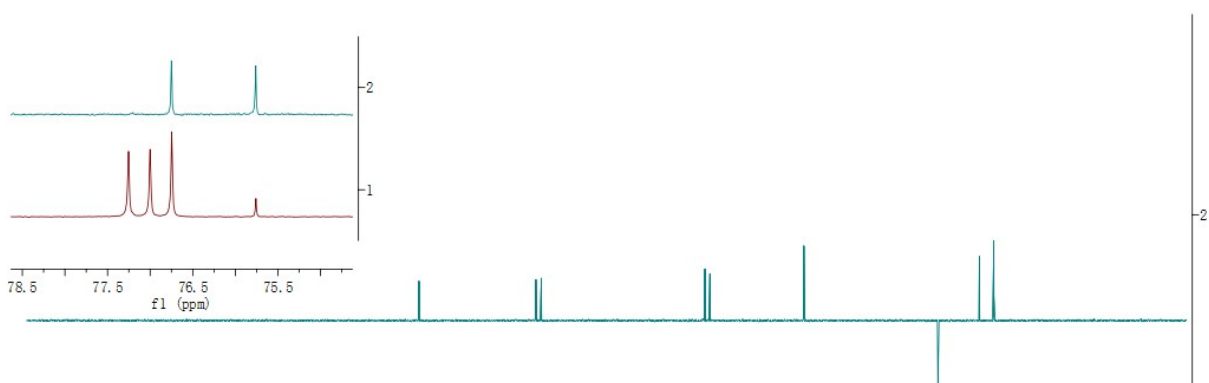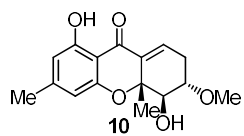

Chemical Formula:  $C_{16}H_{18}O_5$   
125 MHz,  $CDCl_3$

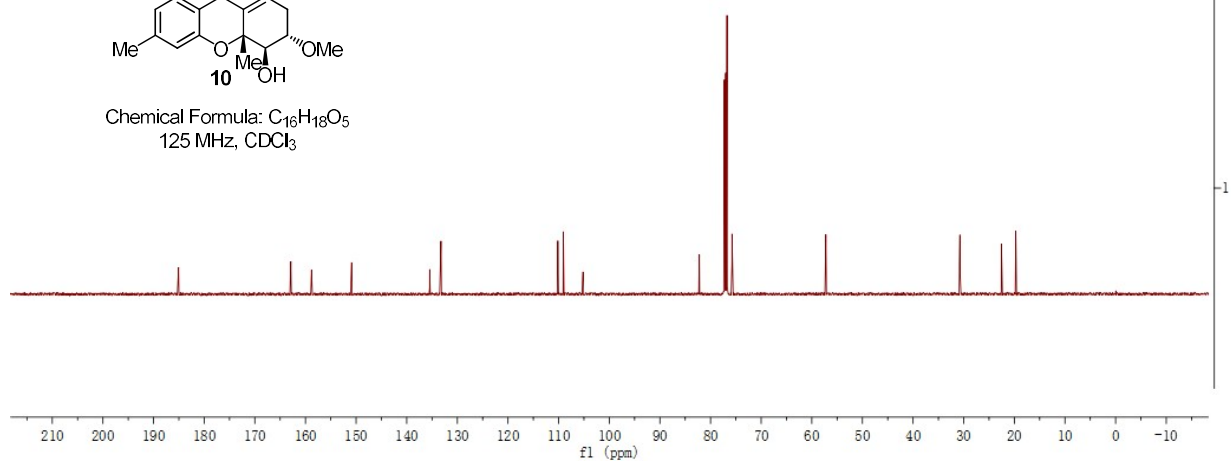

—13.12

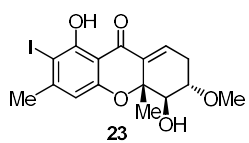

Chemical Formula: C<sub>16</sub>H<sub>17</sub>IO<sub>5</sub>  
400 MHz, CDCl<sub>3</sub>

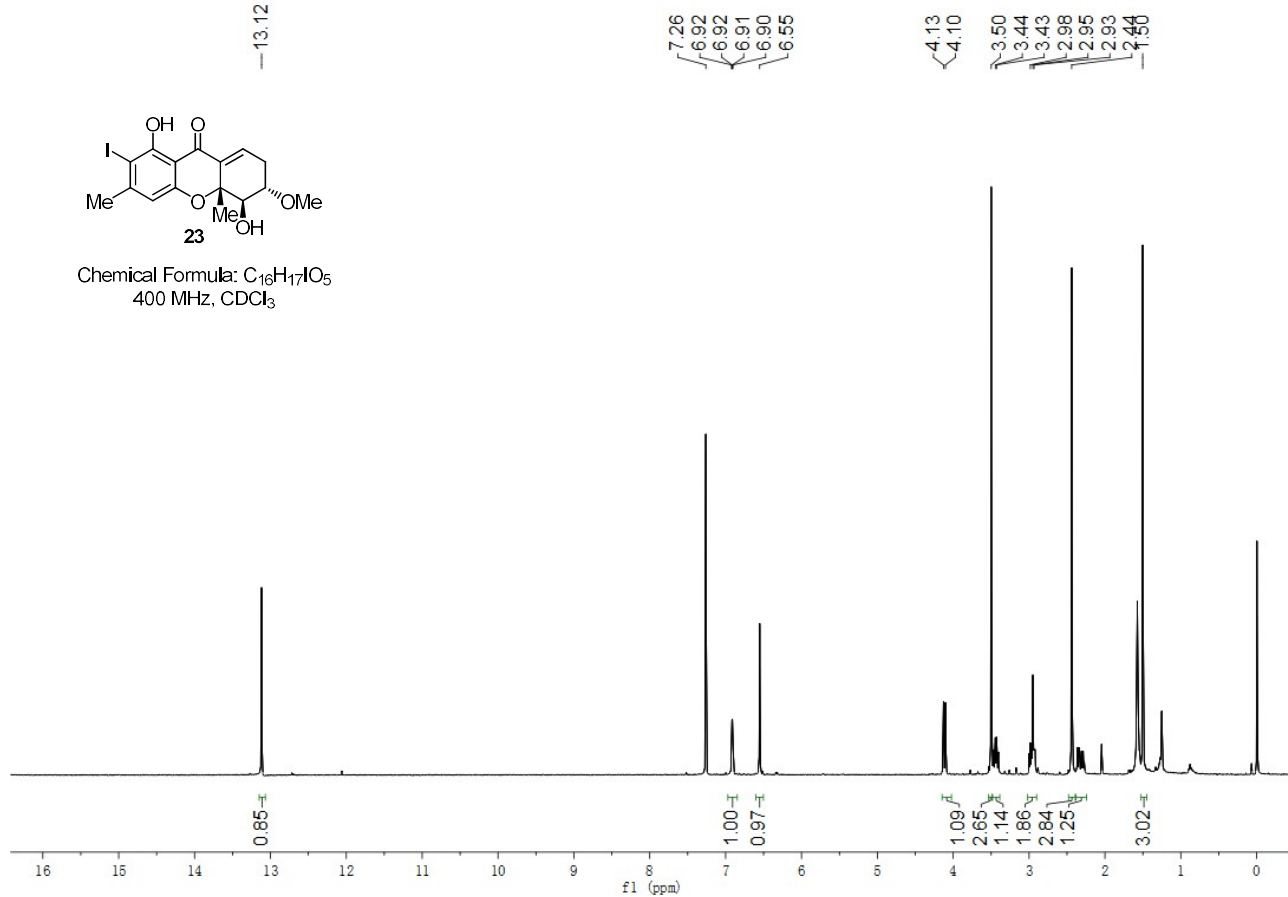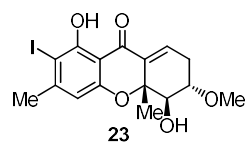

Chemical Formula: C<sub>16</sub>H<sub>17</sub>IO<sub>5</sub>  
125 MHz, CDCl<sub>3</sub>

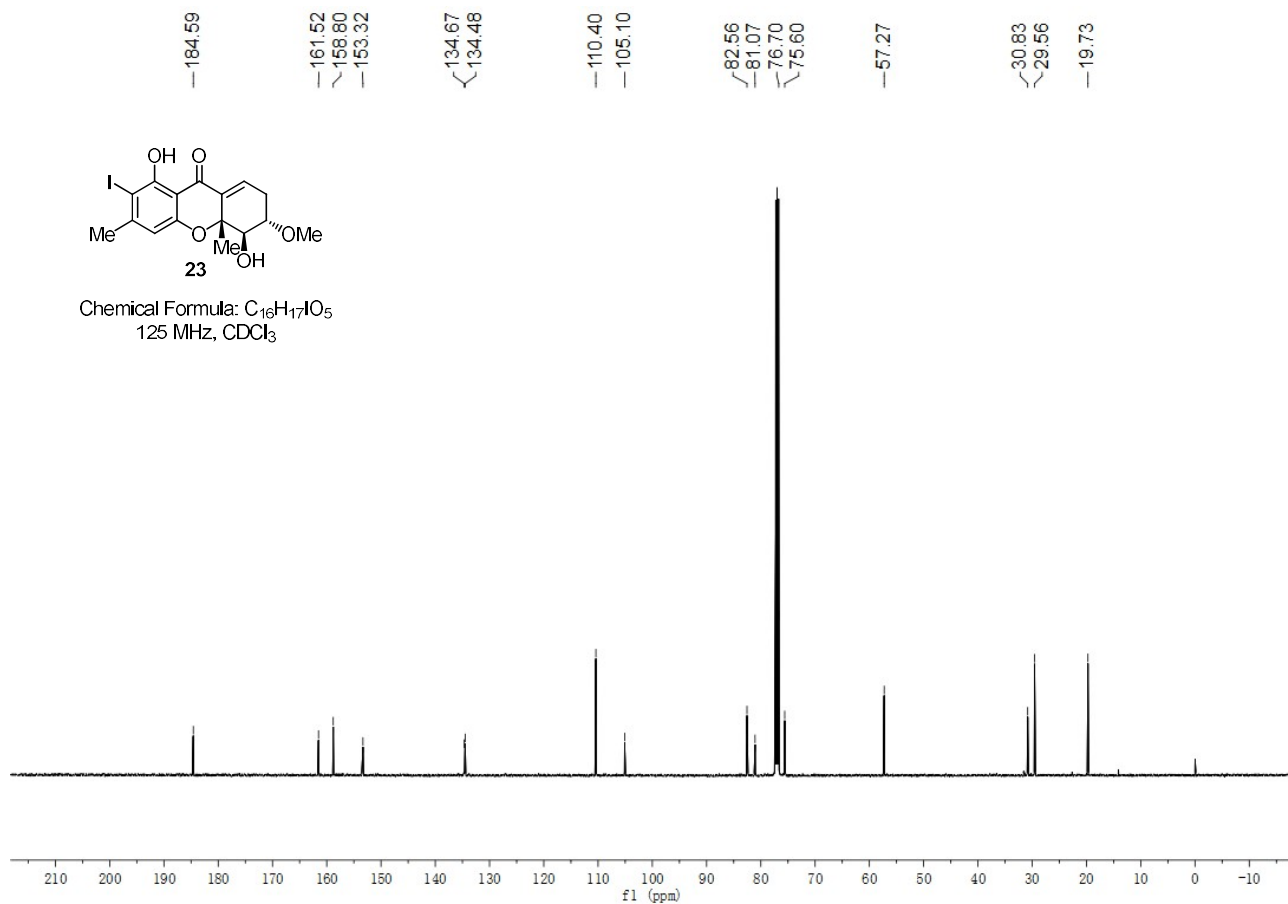

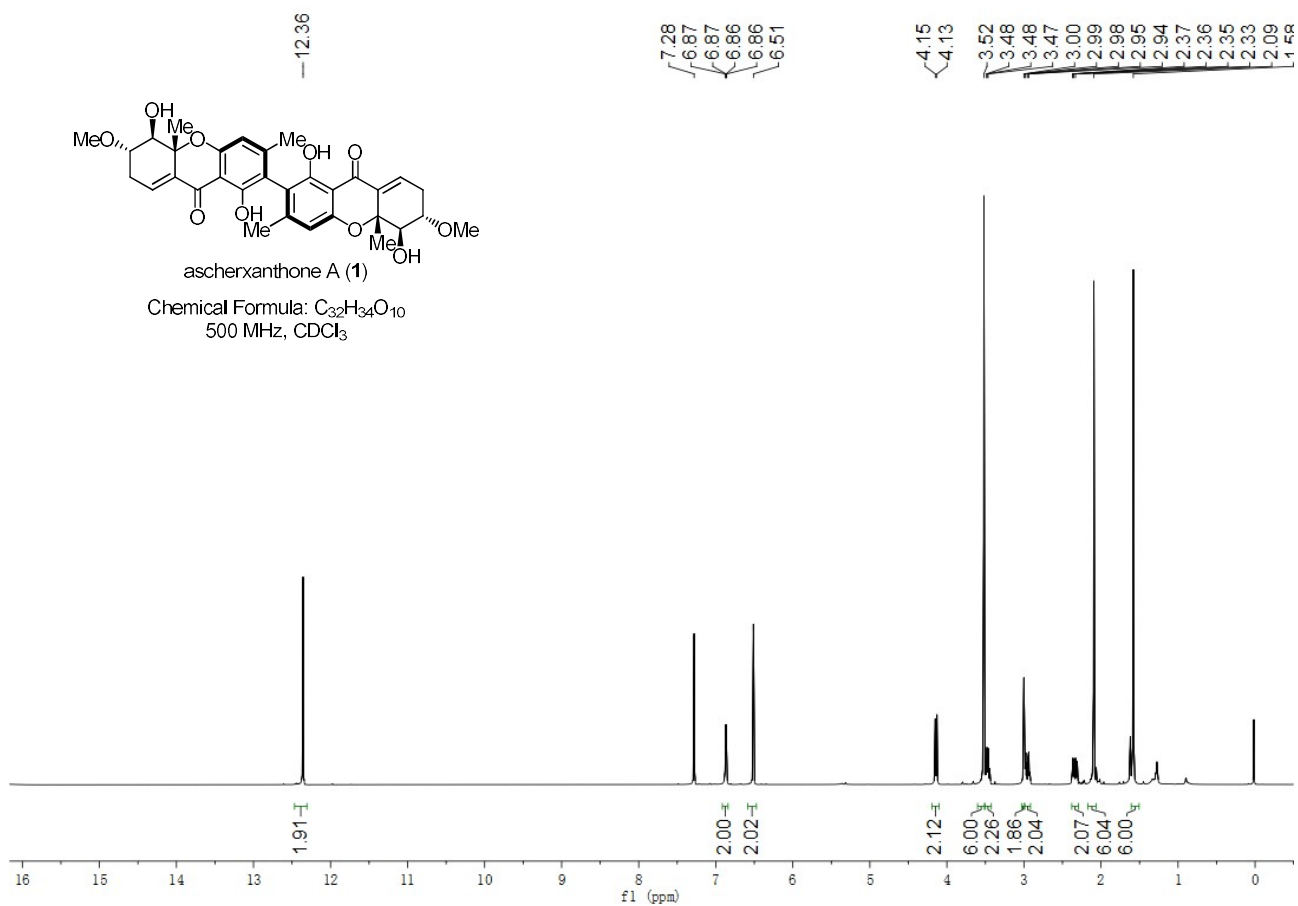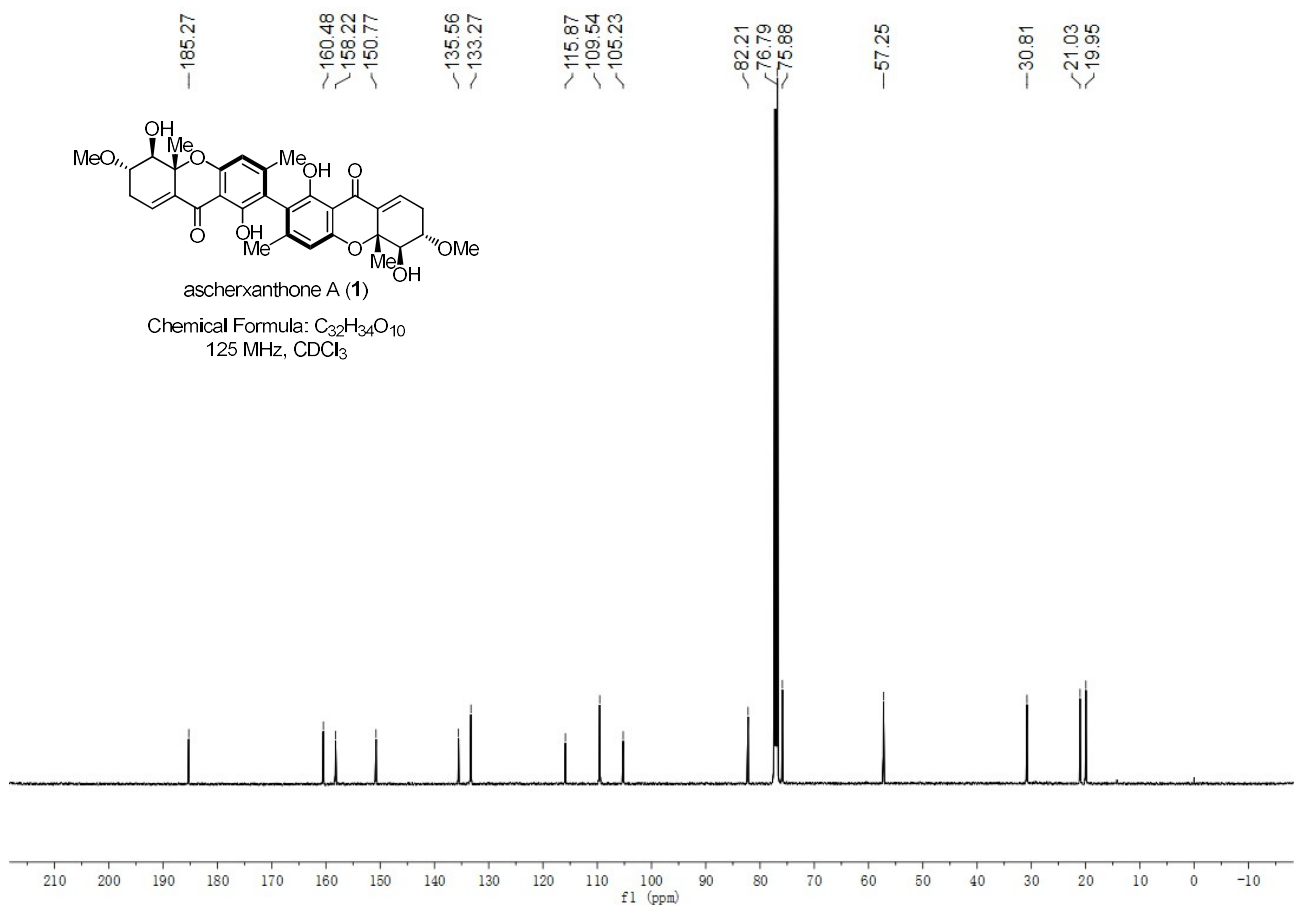

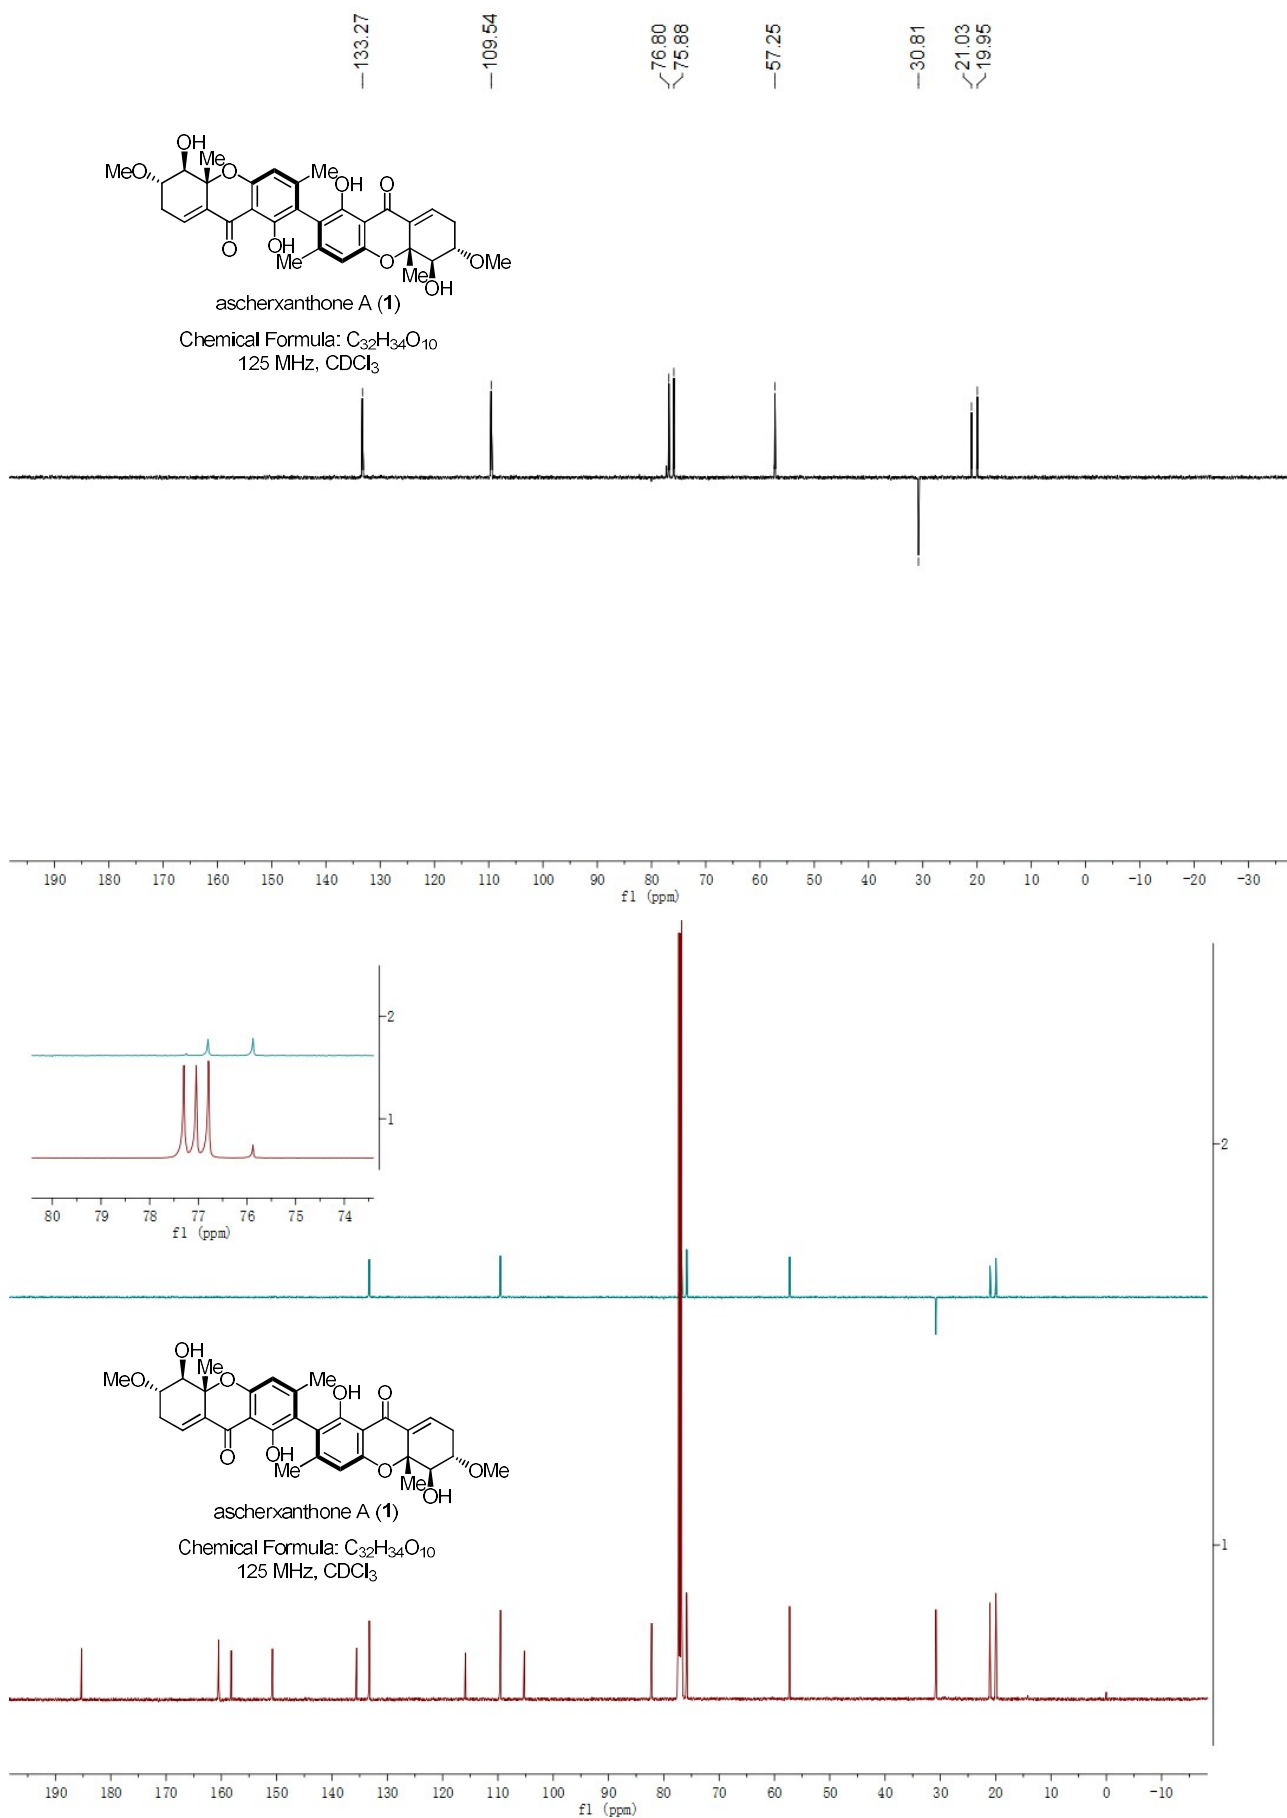



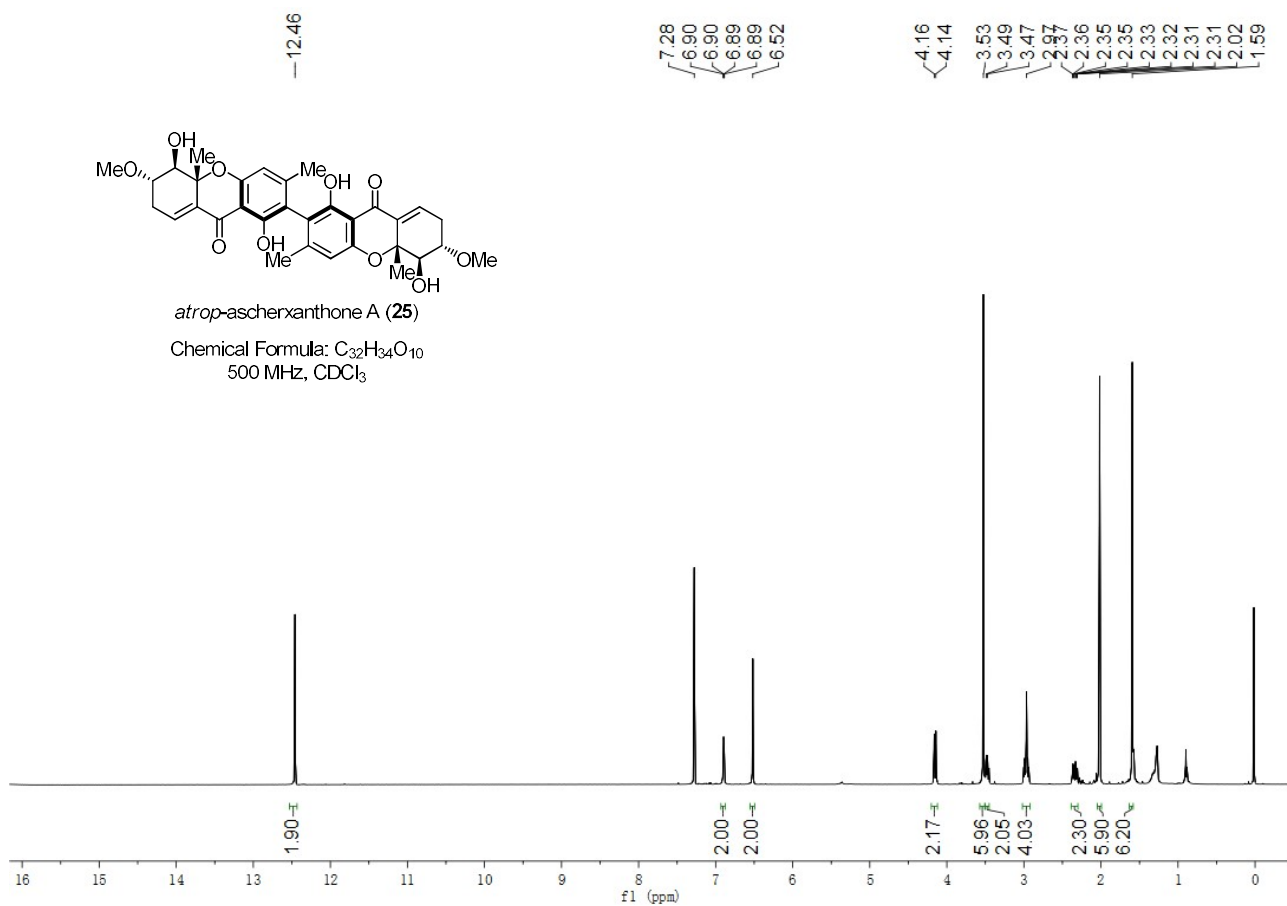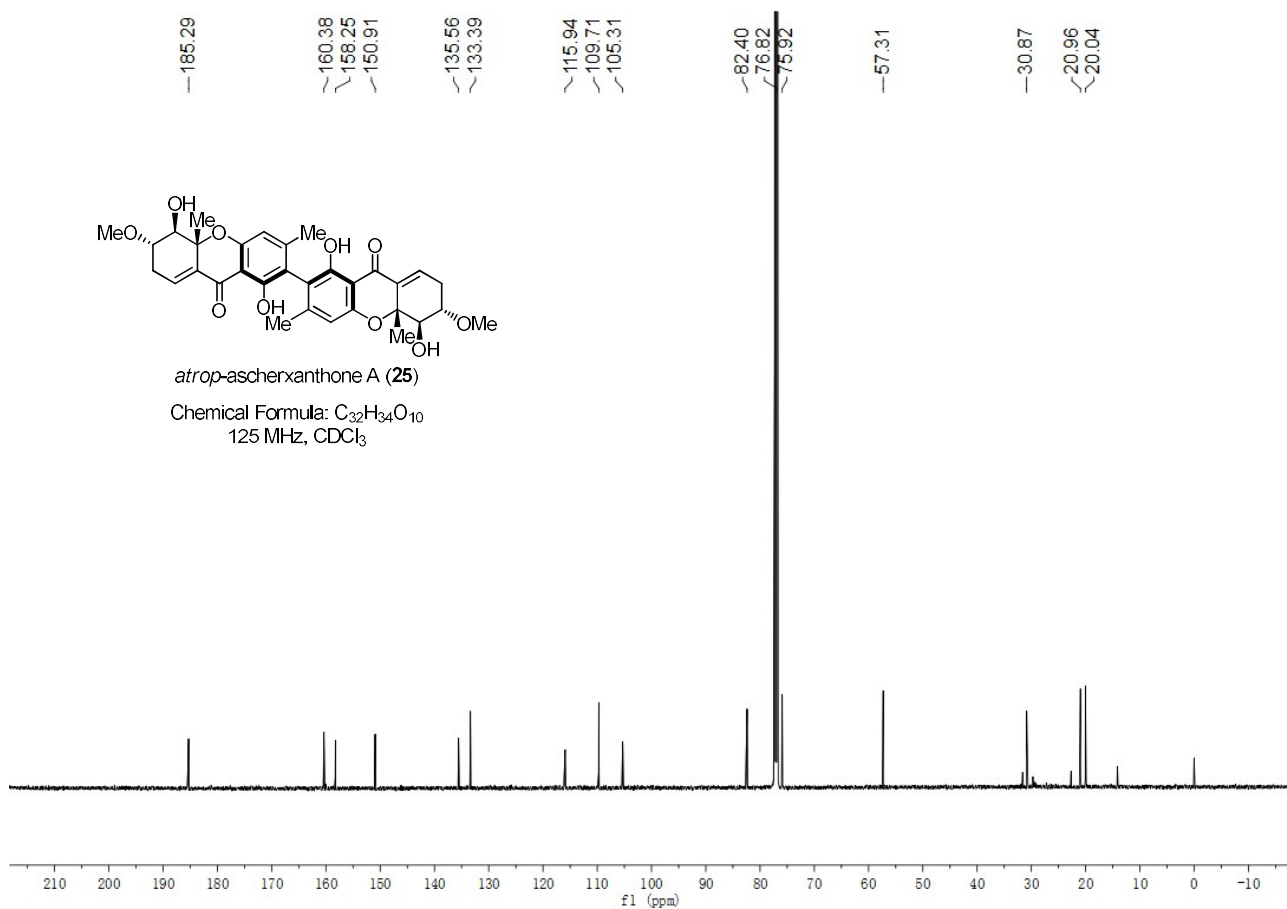

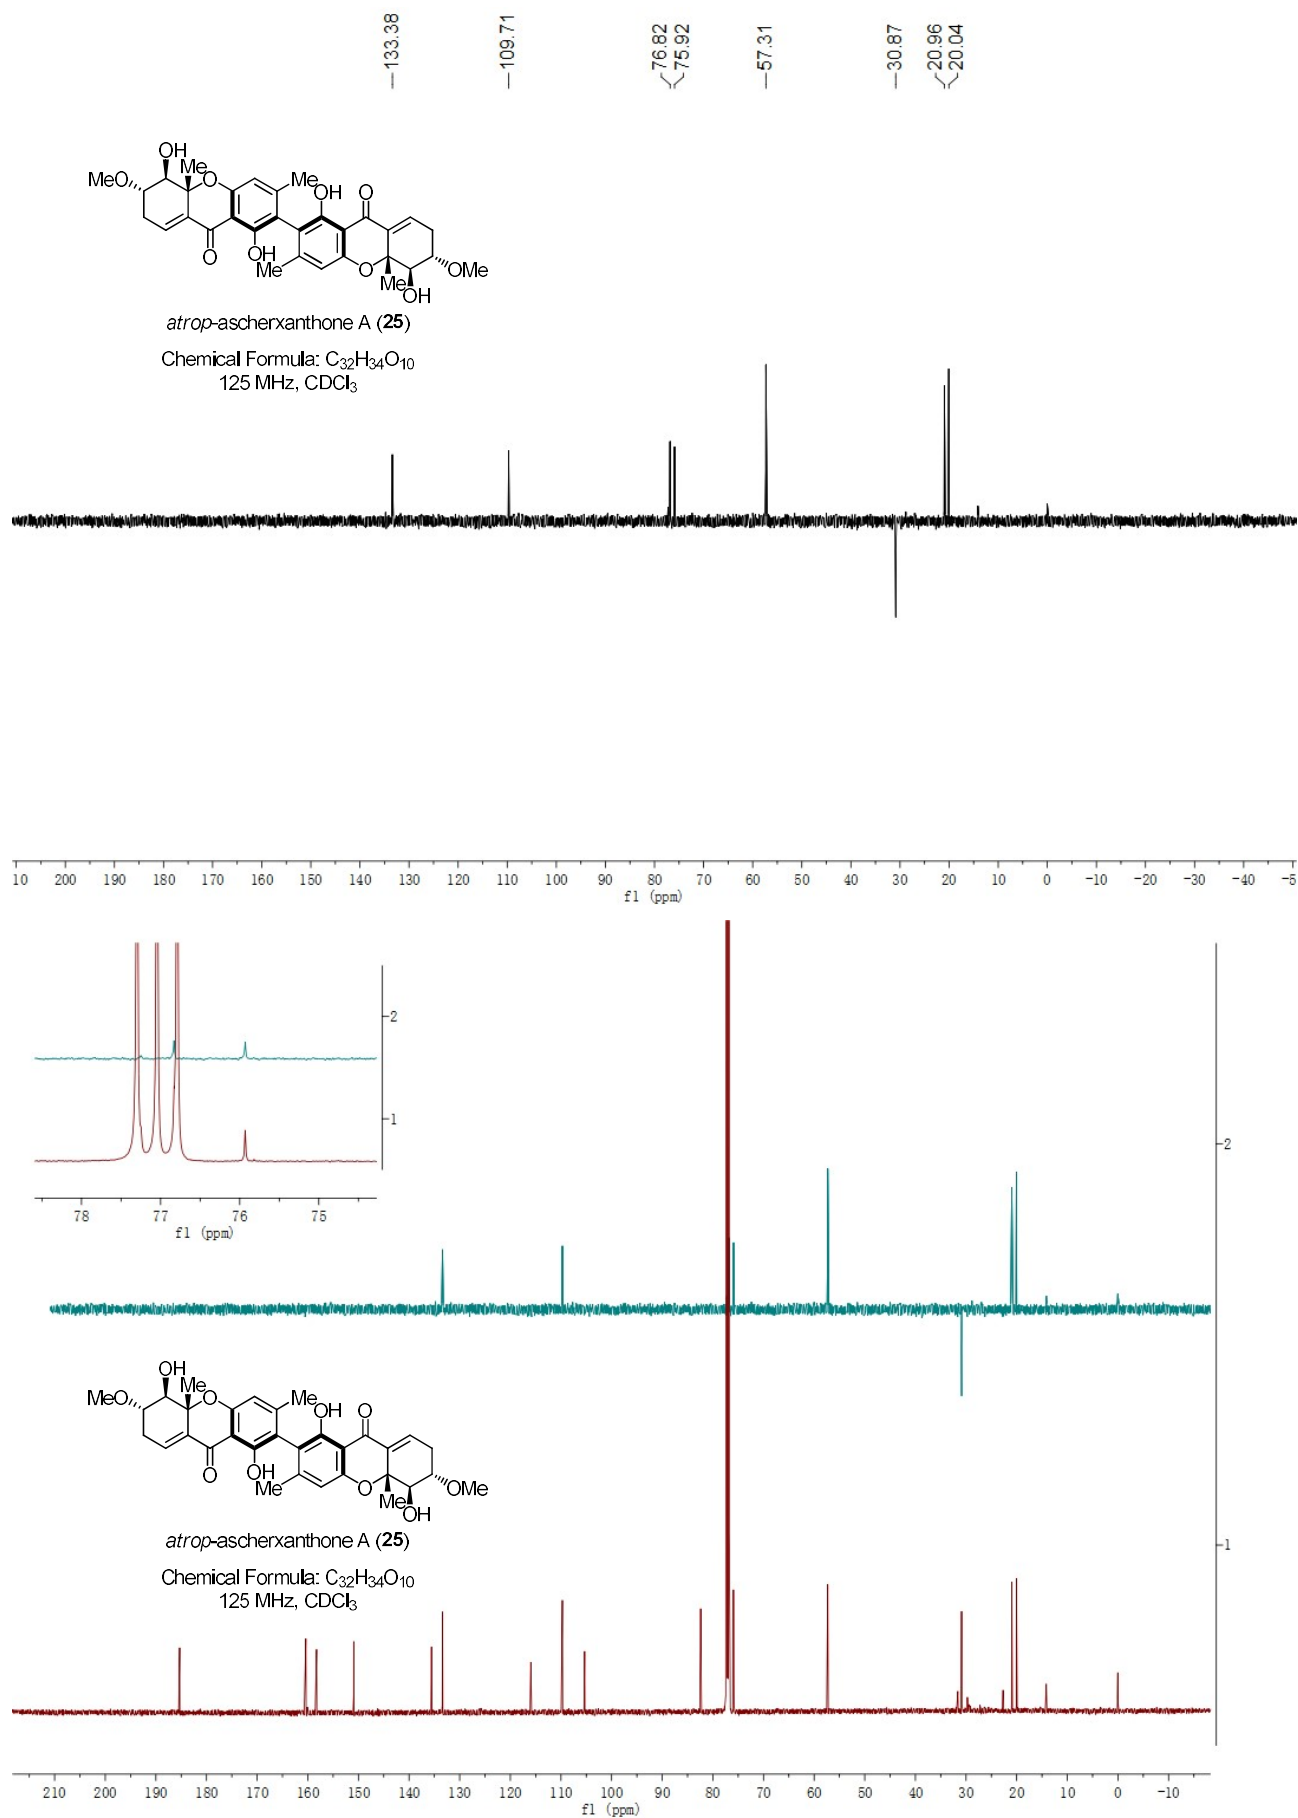

# Comparison of NMR spectroscopic of natural and synthetic ascherxanthone A:

purity check: Sample A

AL 116- ascherxanthone A ( 0.5 mg) in CDCl<sub>3</sub>

24-02-17

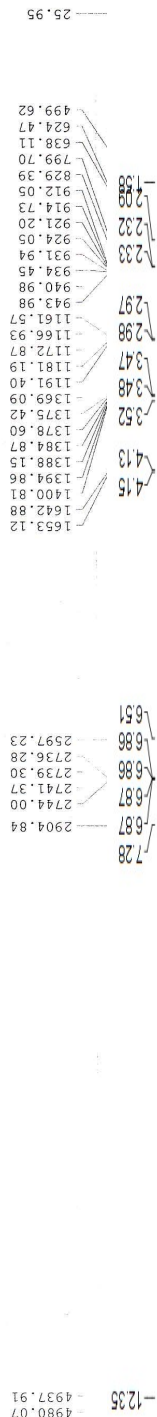

Sample ascherxanthone A from Prof. Isaka

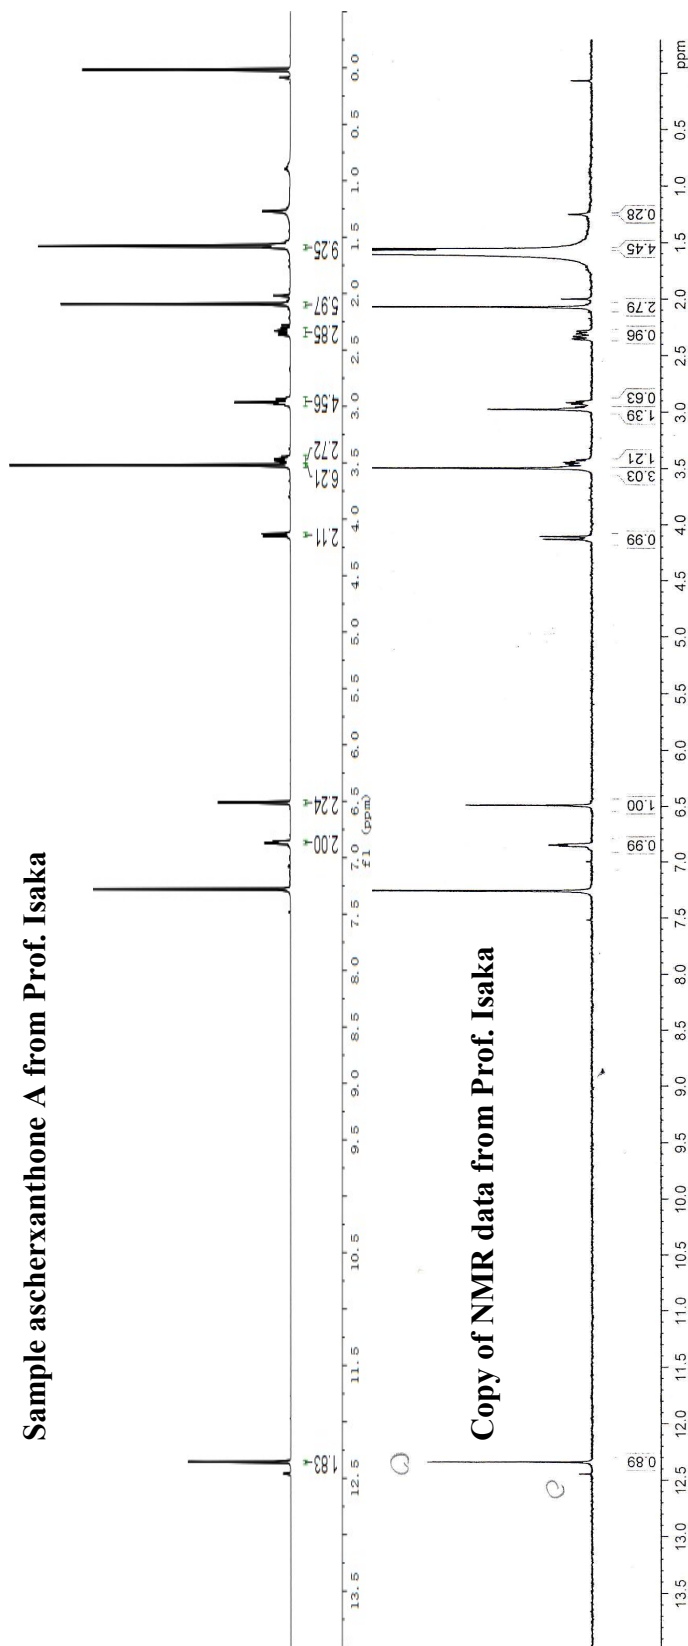

Copy of NMR data from Prof. Isaka

**Sample ascherxanthone A from Prof. Isaka**

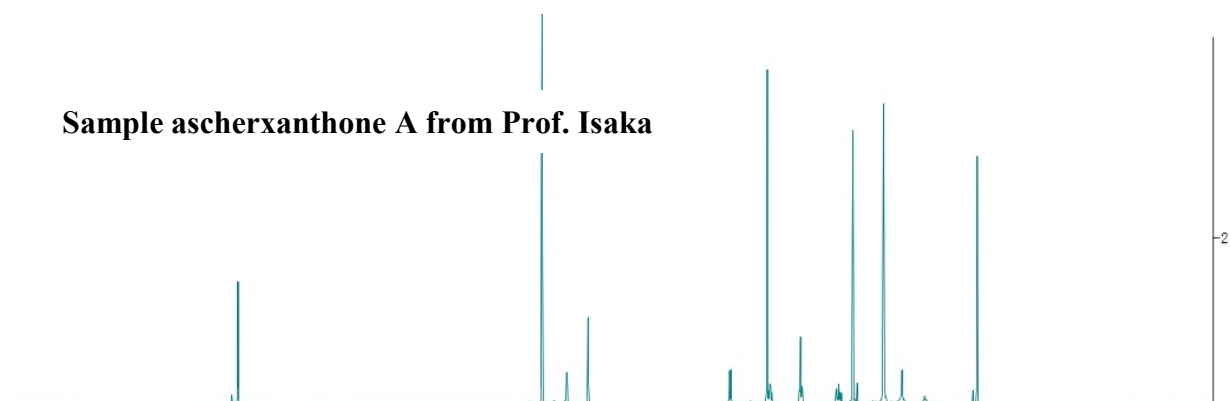

**Synthetic ascherxanthone A (this work)**

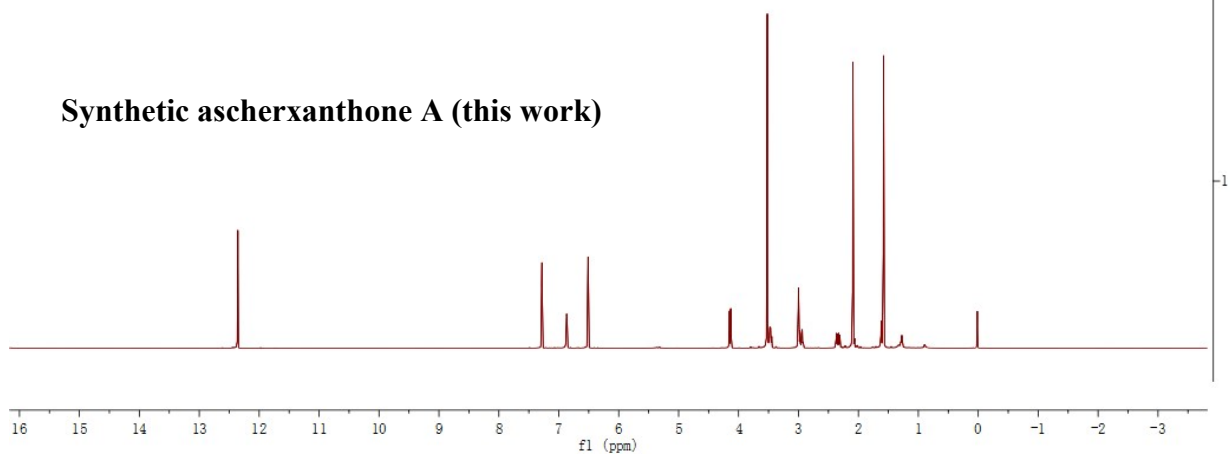

**Sample ascherxanthone A from Prof. Isaka**

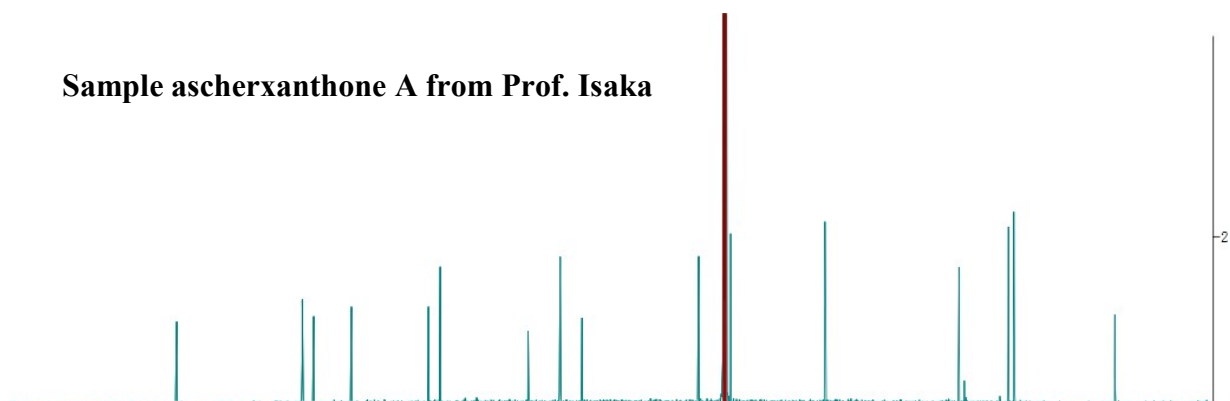

**Synthetic ascherxanthone A (this work)**

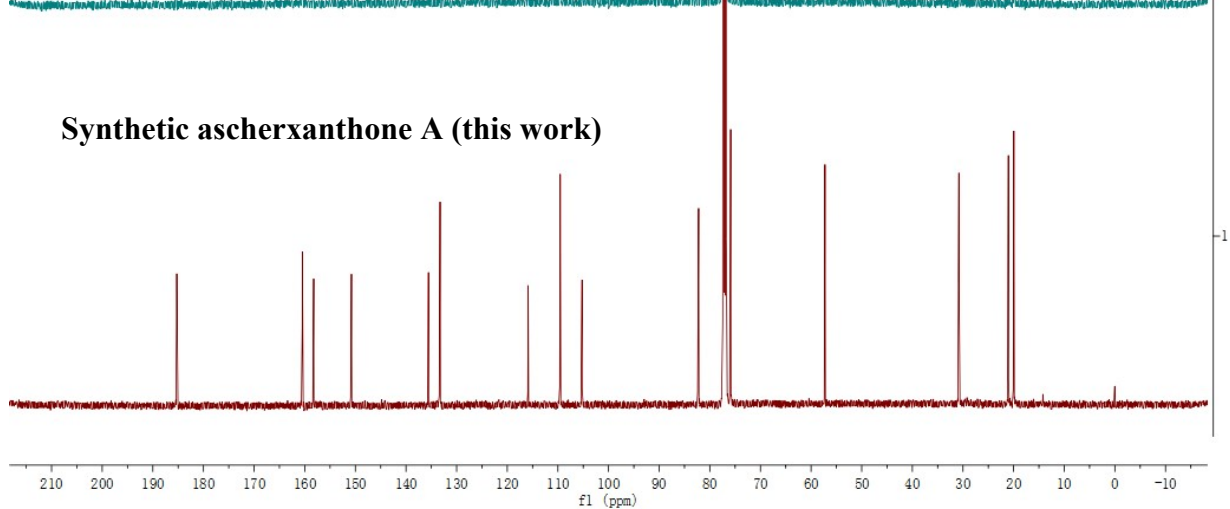

**Sample ascherxanthone A from Prof. Isaka**

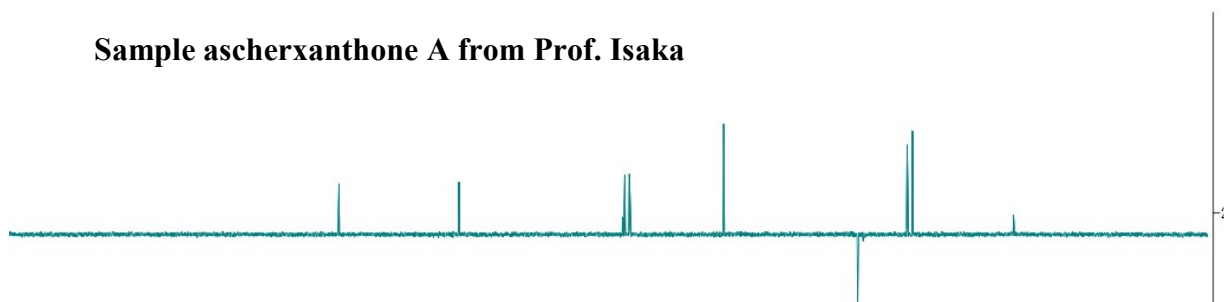

**Synthetic ascherxanthone A (this work)**

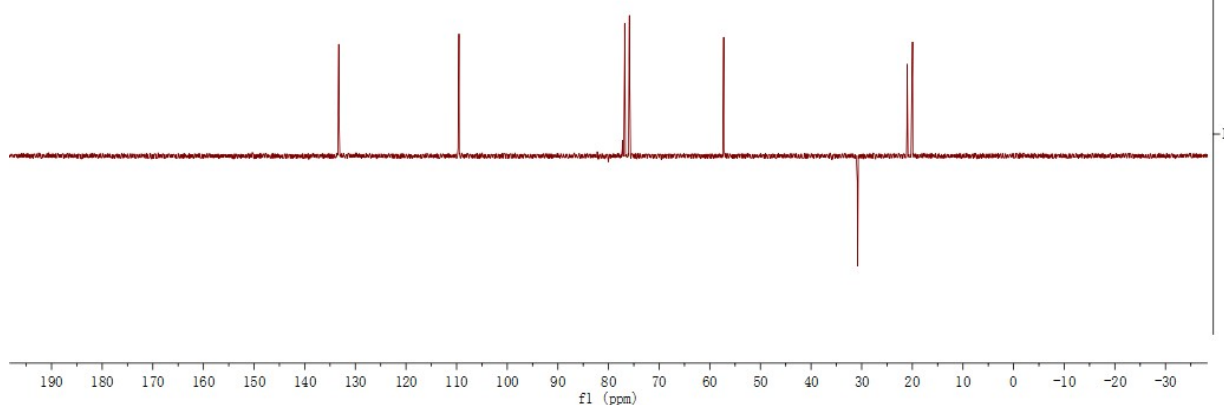

12.46  
12.35

7.28  
6.90  
6.90  
6.89  
6.89  
6.87  
6.86  
6.86  
6.52  
6.51

4.16  
4.15  
4.14  
4.13

3.53  
3.52  
3.48  
3.48  
3.47  
2.99  
2.98  
2.96  
2.95  
2.94  
2.37  
2.36  
2.35  
2.34

**Mixture of ascherxanthone A and  
*atrop*-ascherxanthone A (from Prof. Isaka)**

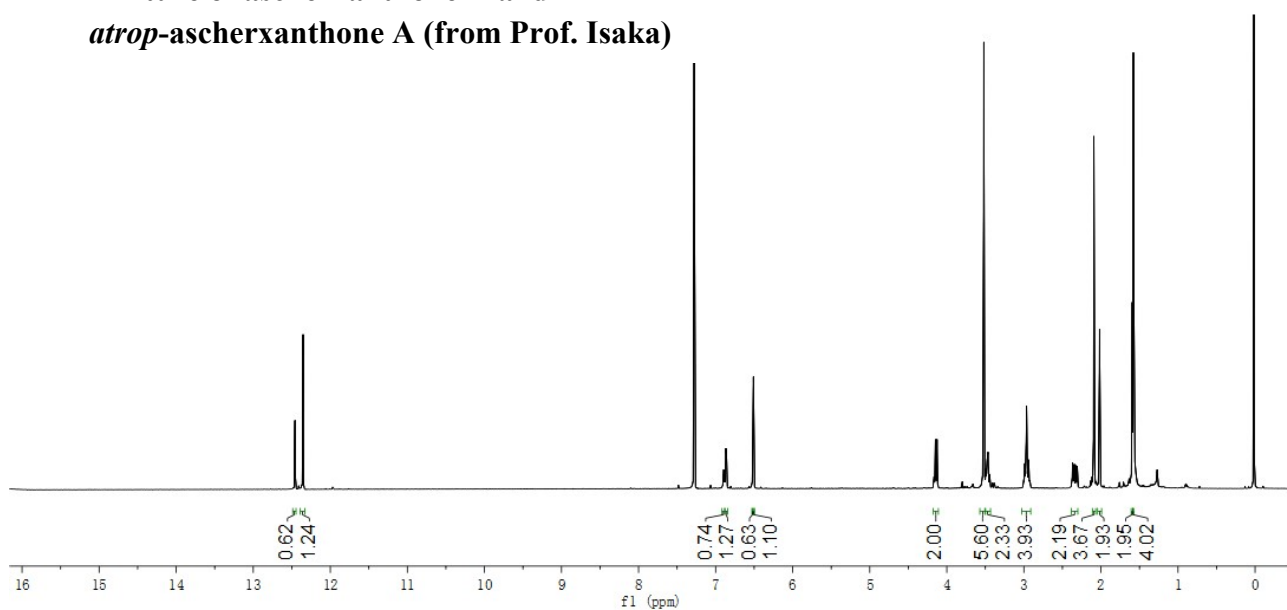

0.62  
1.24

0.74  
1.27  
0.63  
1.10

2.00  
5.60  
2.33  
3.93

2.19  
3.67  
1.93  
1.95  
4.02

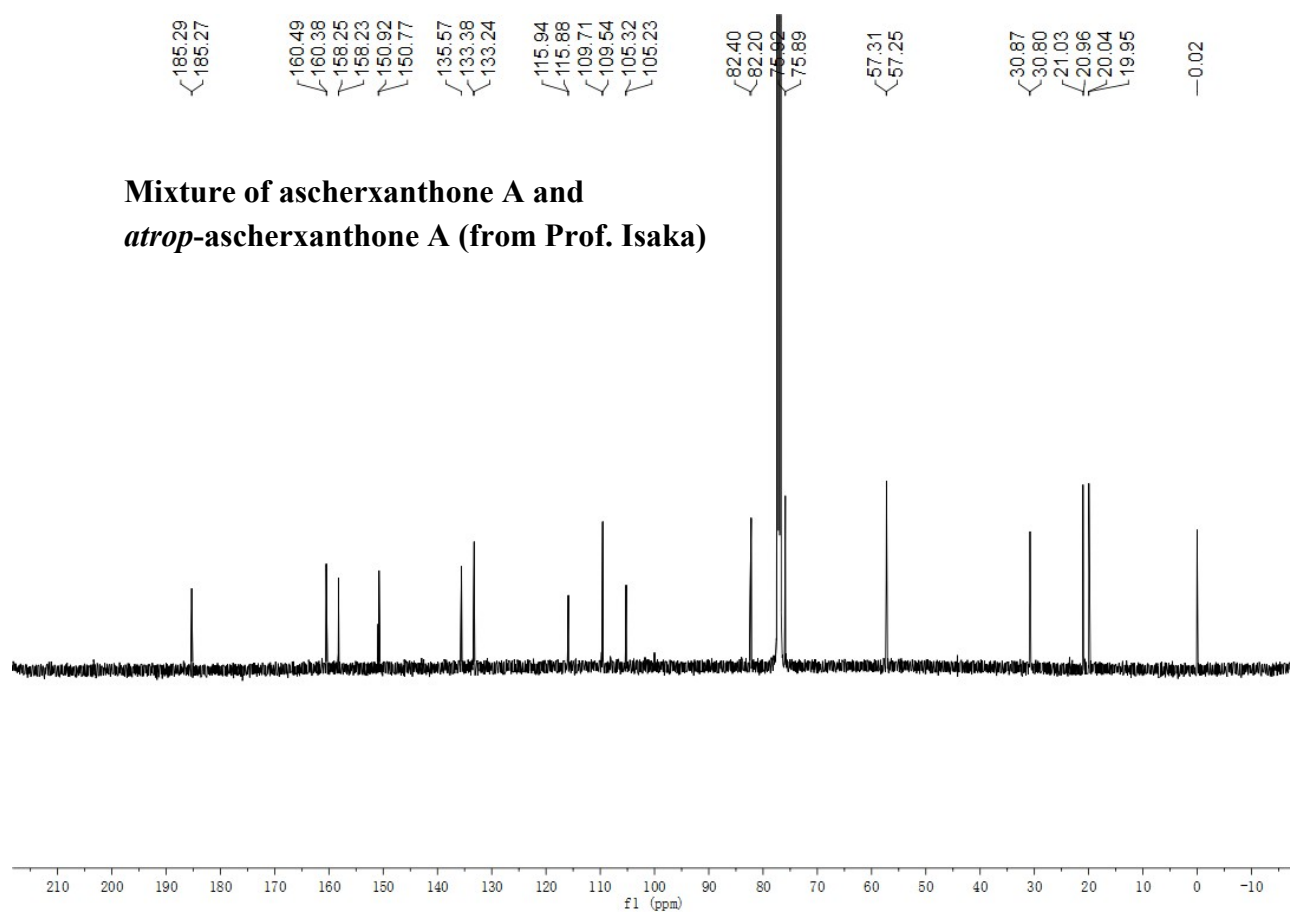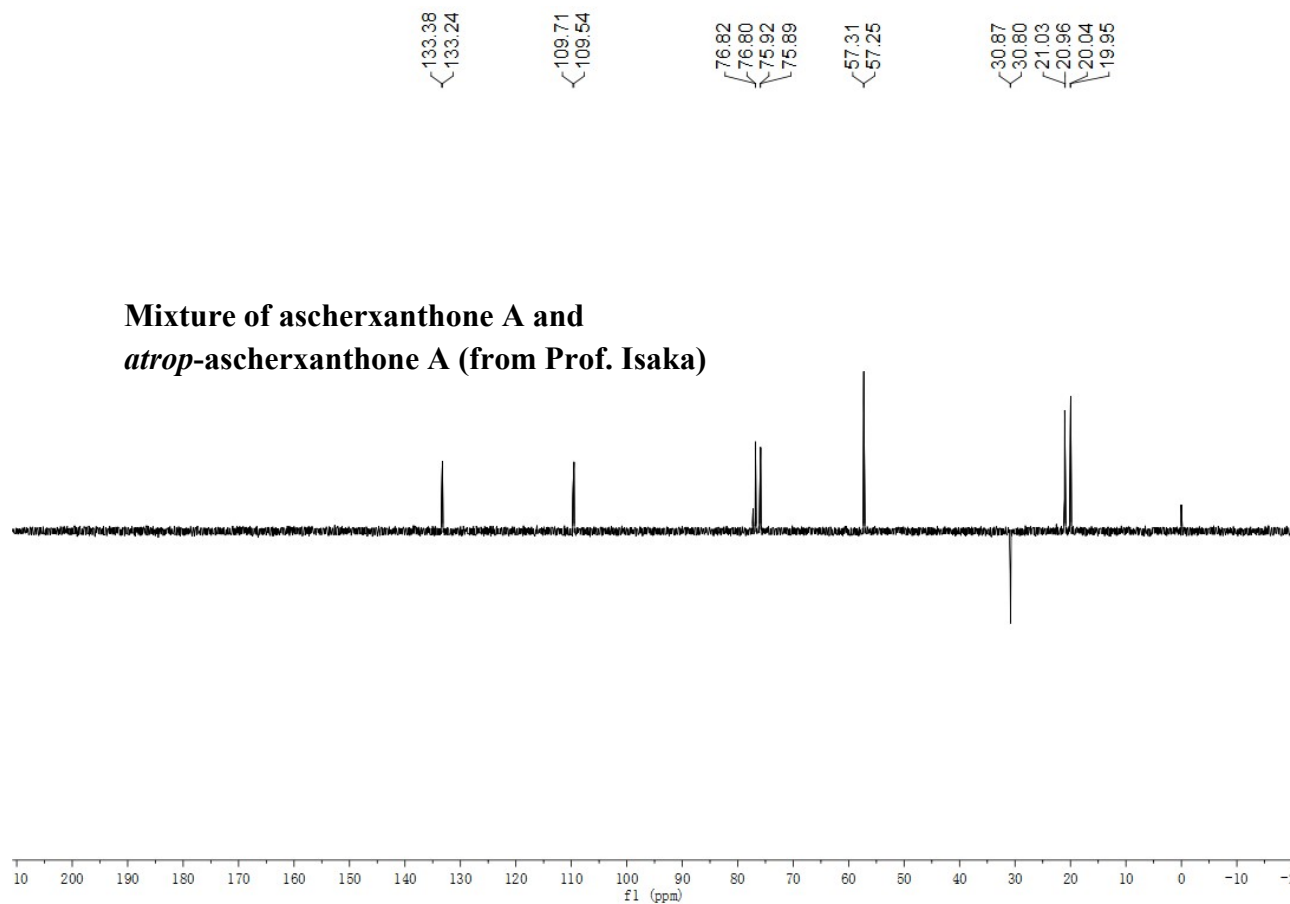

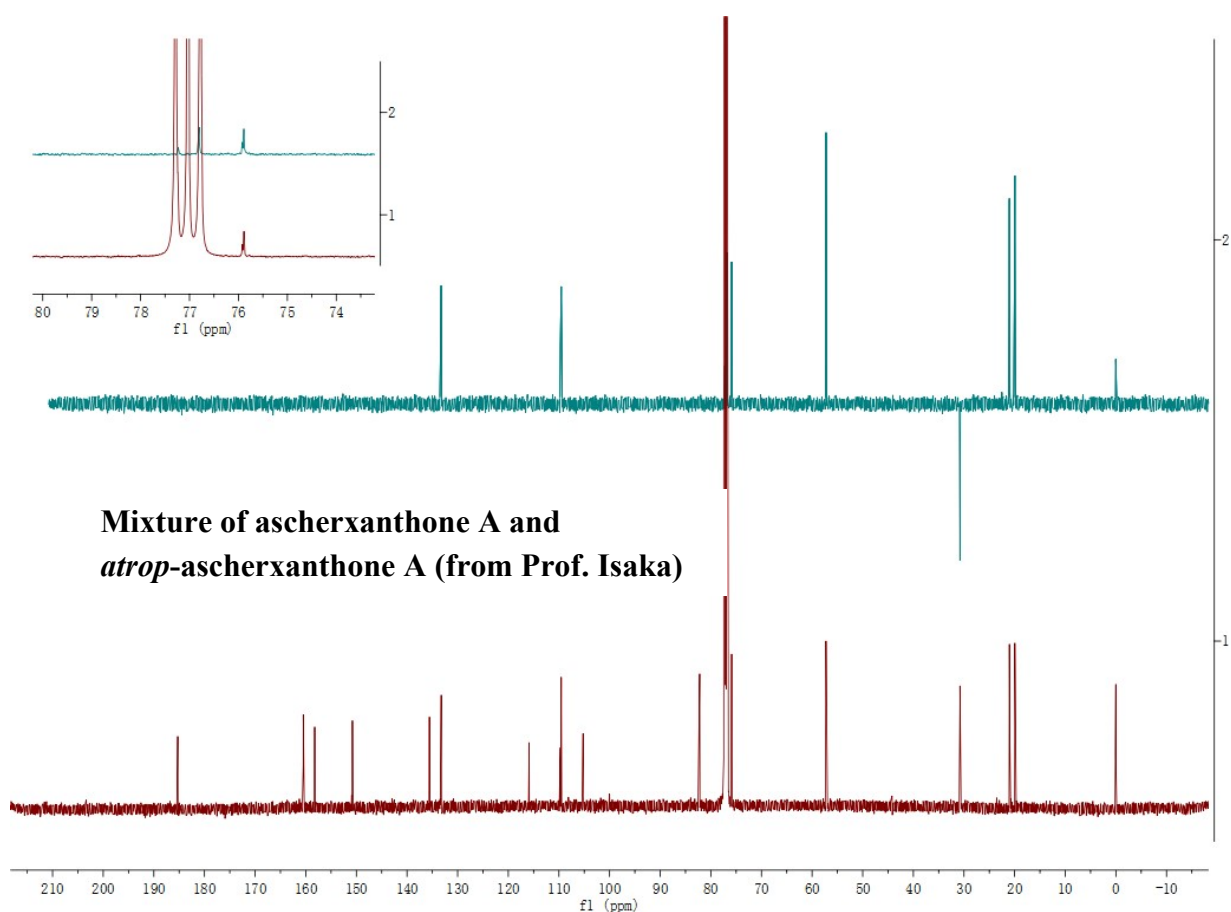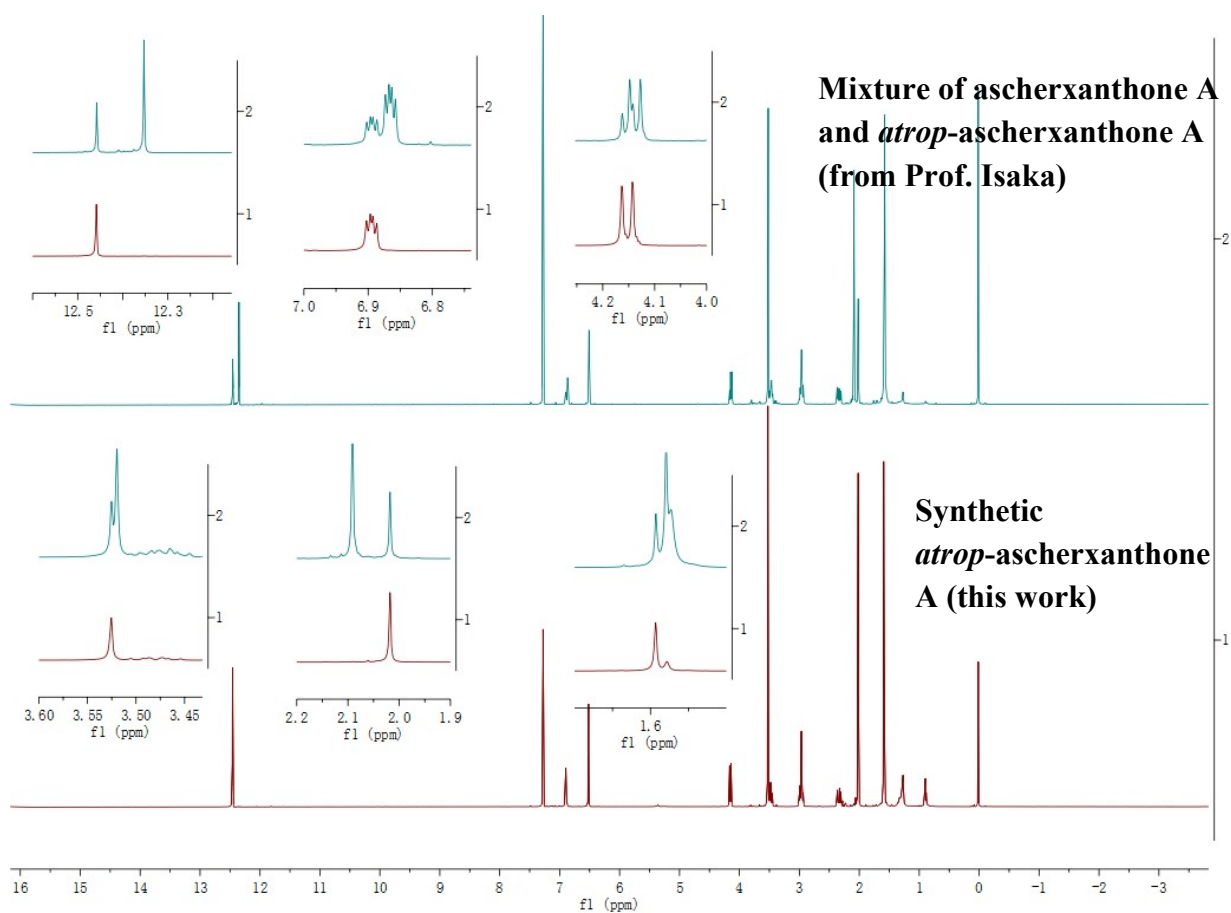

**Mixture of ascherxanthone A  
and *atrop*-ascherxanthone A  
(from Prof. Isaka)**

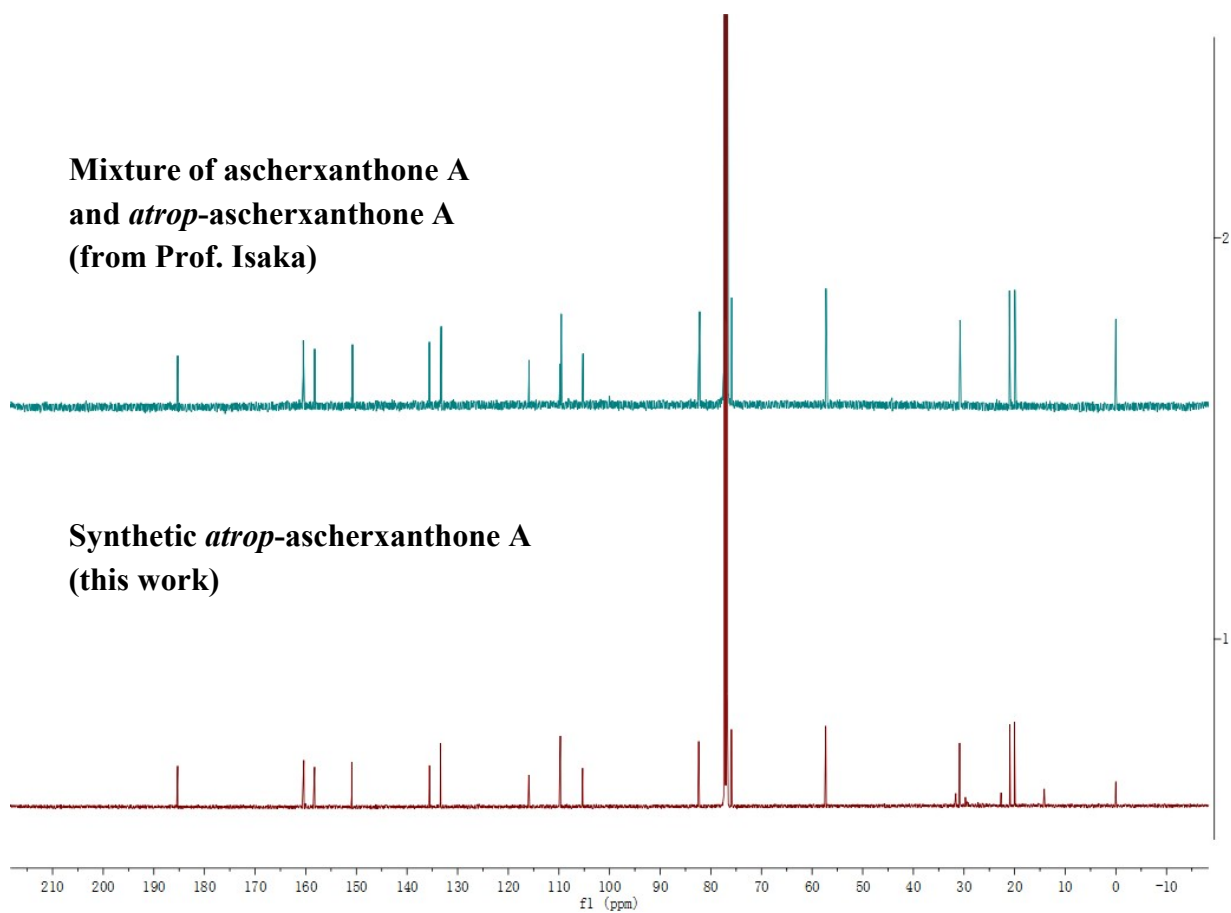

**Synthetic *atrop*-ascherxanthone A  
(this work)**

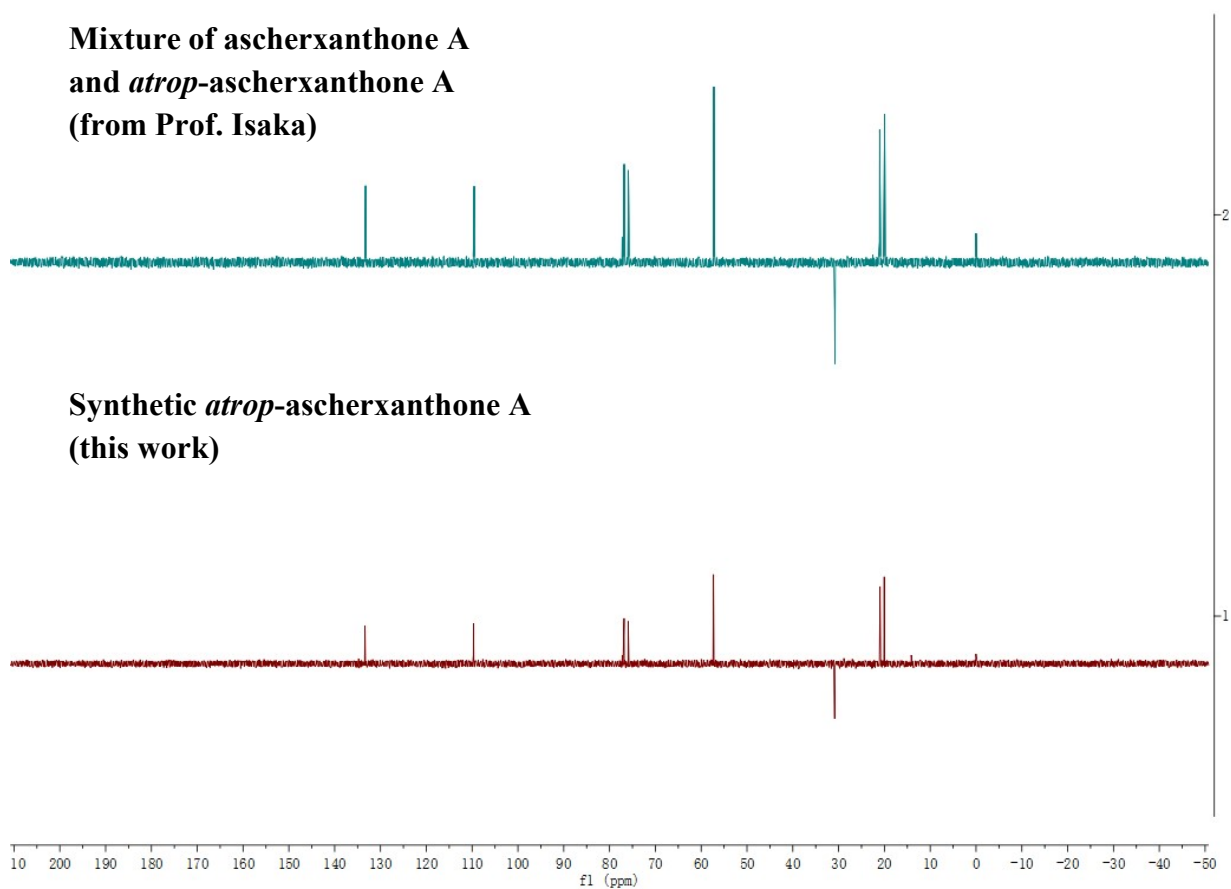

Supplement: Supplementary file 1 [file 7895971]
